# Supplementary material
Source: publisher figshare collection journal article supplement (https://tandf.figshare.com/articles/dataset/_/4738054)

**Figure S1.** The phylogenetic trees of subhaplogroups K1a2, K1a4, K1a13, K1a30, K1b1c, K1b2a2, U1a1c, U2e1b1, U2e2a1d, U3a1, U3a3, U4a2, U4b, U4c1, U4d2, U5a1a1,U5a1a2a, U5a2b, U5b1a, U5b1e’h, U5b3, U7b and U8a1a1a based on complete mitochondrial genome sequences. Serbian (Sb) haplotypes are marked in yellow. Haplogroup names are in boldface. The mutations that are haplogroup diagnostic are listed above the haplogroup names. New proposed subclades are bold and marked in red, redefined subclades are bold-italic and marked in red. Back mutations are underlined, < denotes recurrent mutations, transversions have a base suffix, insertions are marked by “ins” and deletions by “del”. Numbers above haplogroup age estimates represent number of complete mitogenomes used for analysis. Accession numbers and references of sequences used for phylogenetic analysis are listed in Table S3. Ancient samples are marked with †. Time estimates (in kya) calculated according to Soares et al. (2009) (in blue), Perego et al. (2009) (in green) and Soares et al. (2009) (in red) are shown below haplogroup names.

The phylogenetic tree of subhaplogroup K1a2

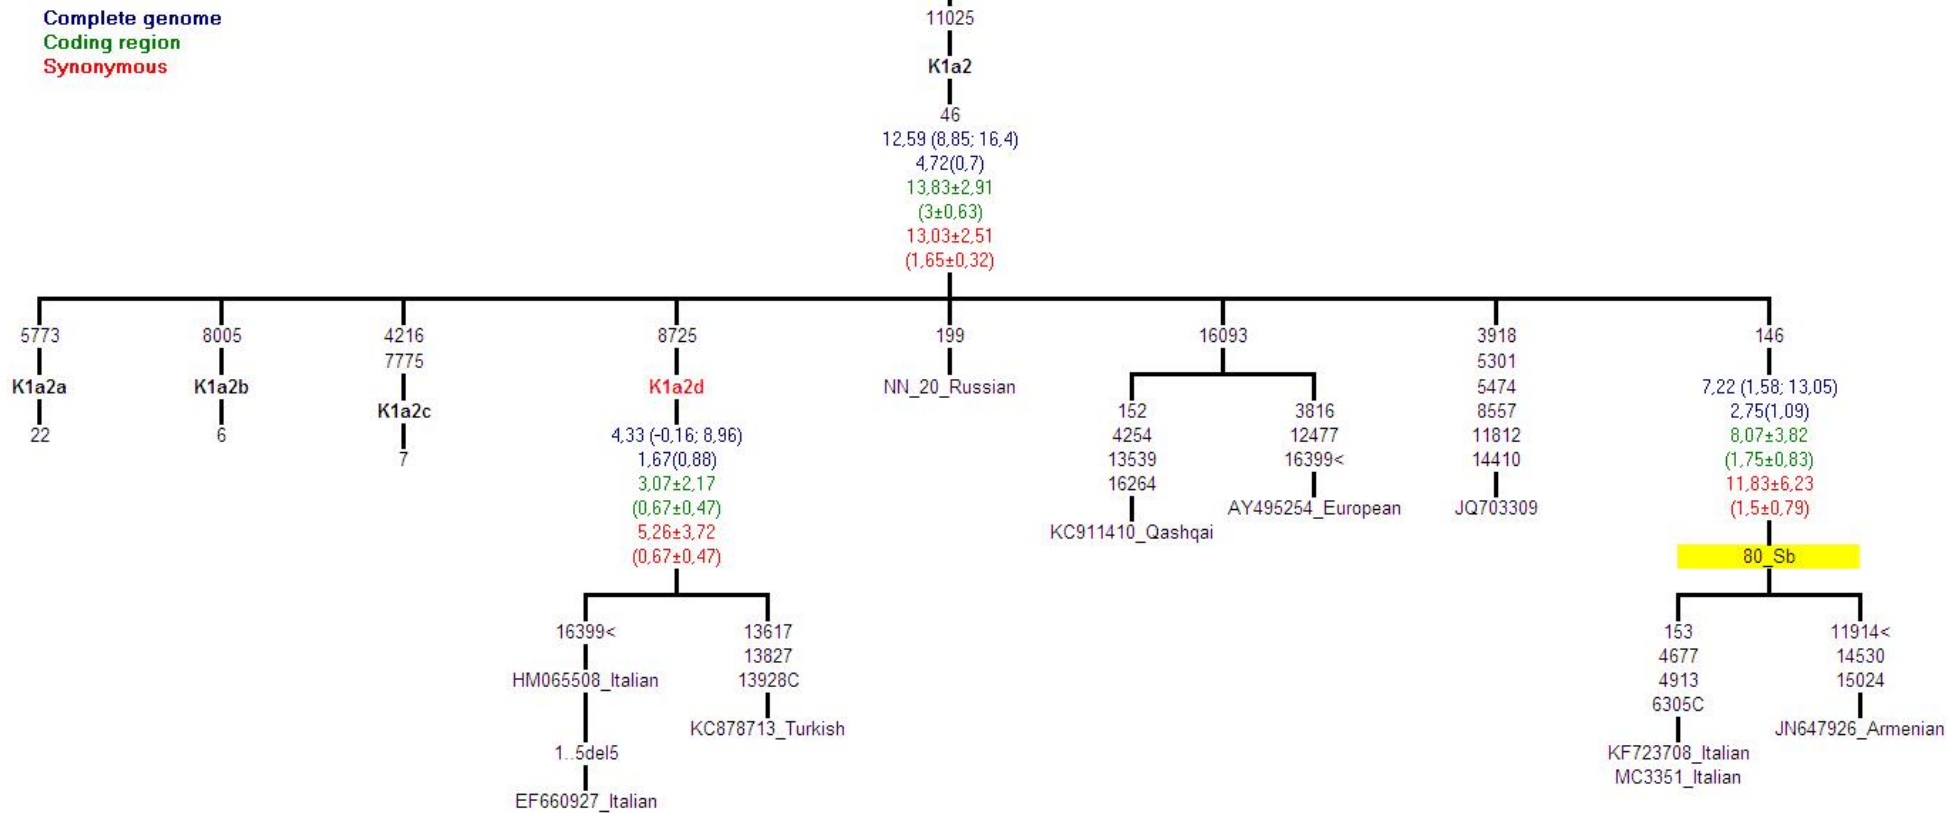

The phylogenetic tree of subhaplogroup K1a4 (to be continued)

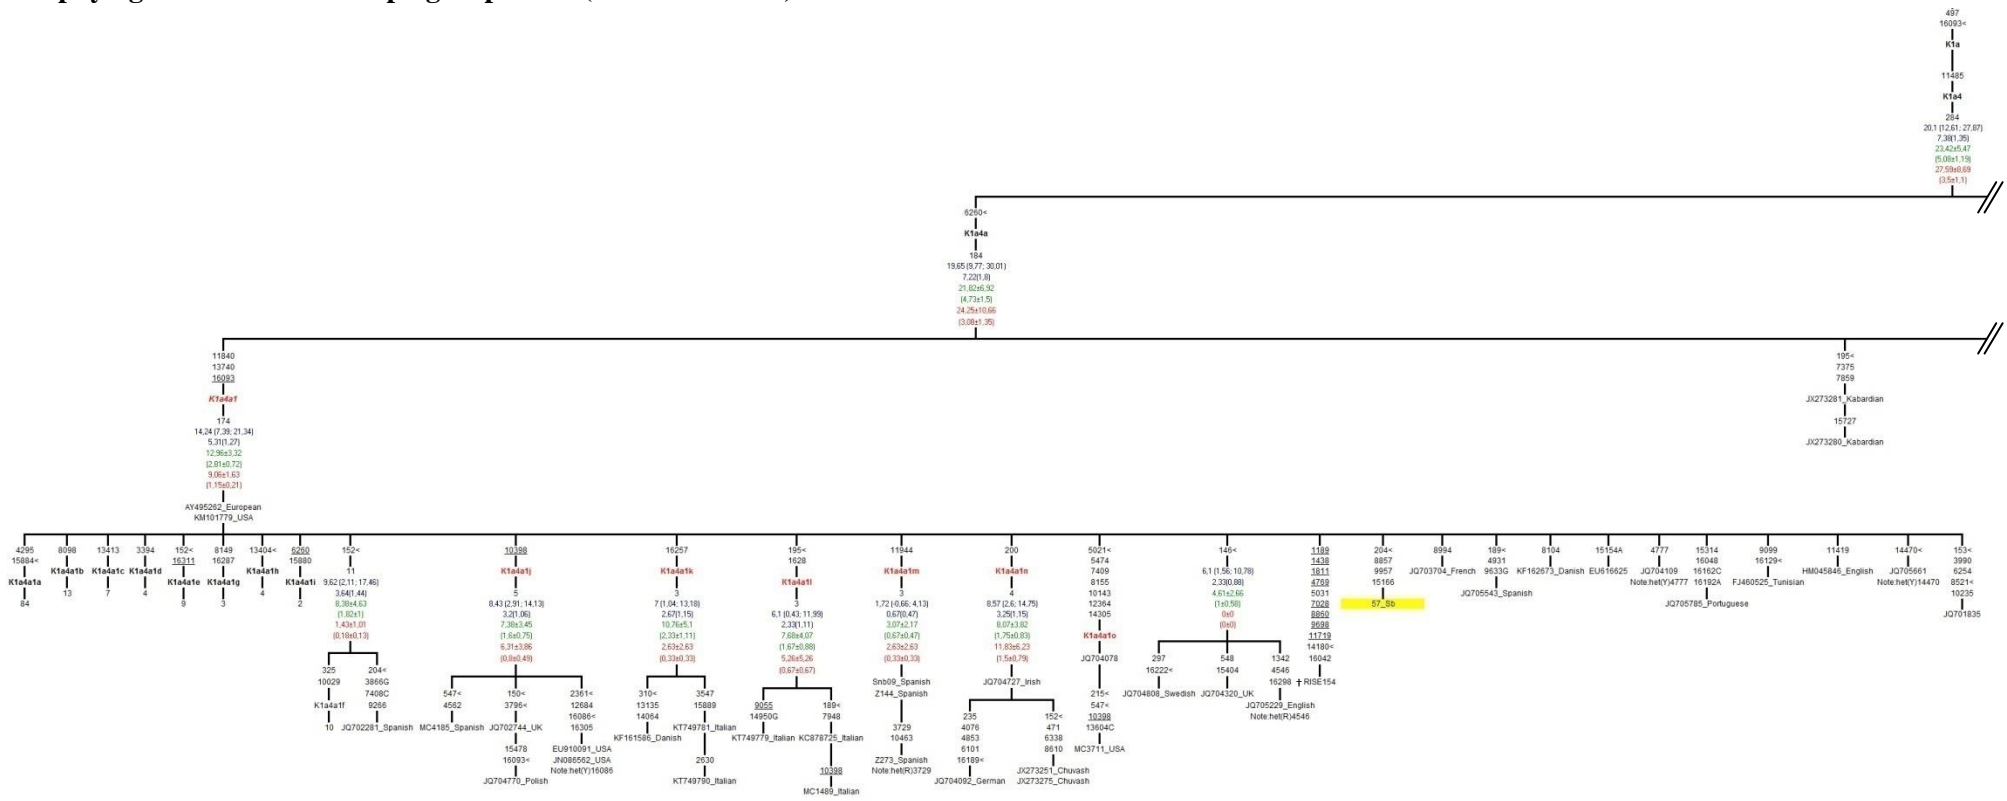

The phylogenetic tree of subhaplogroup K1a4 (continued)

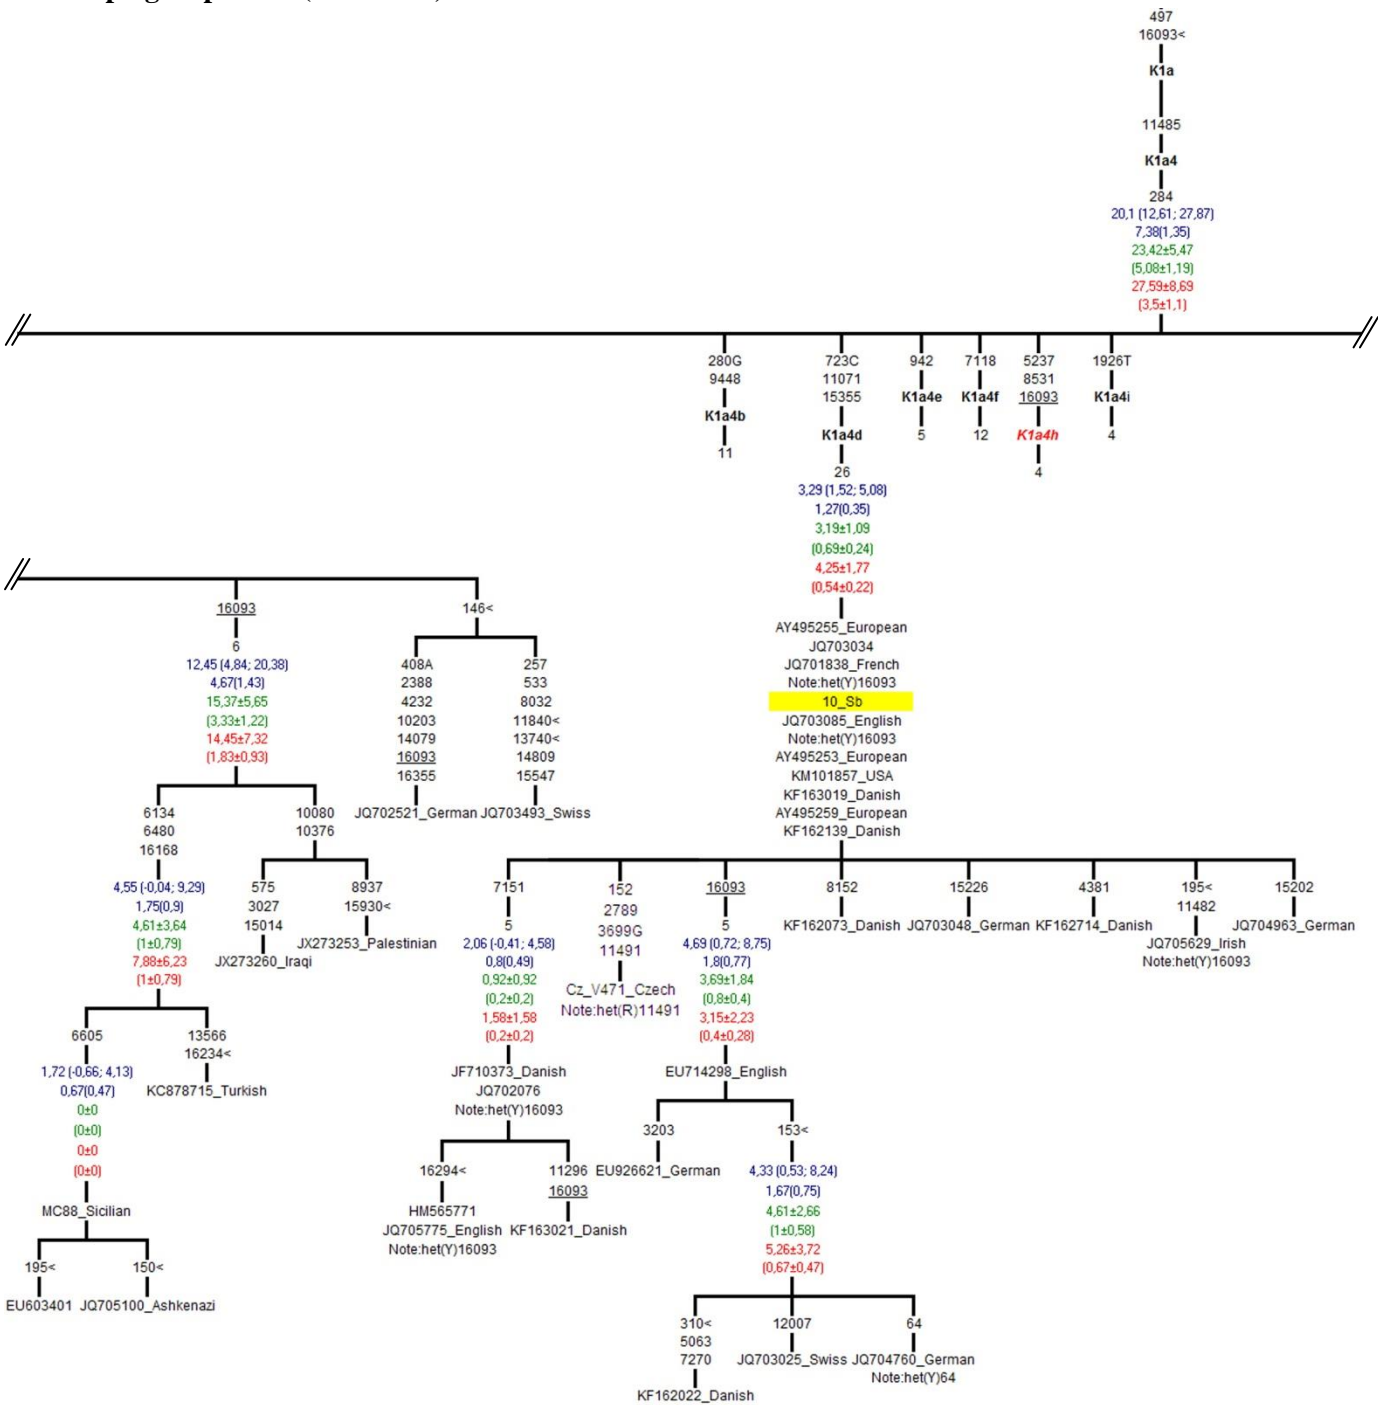

**The phylogenetic tree of subhaplogroup K1a4 (continued)**

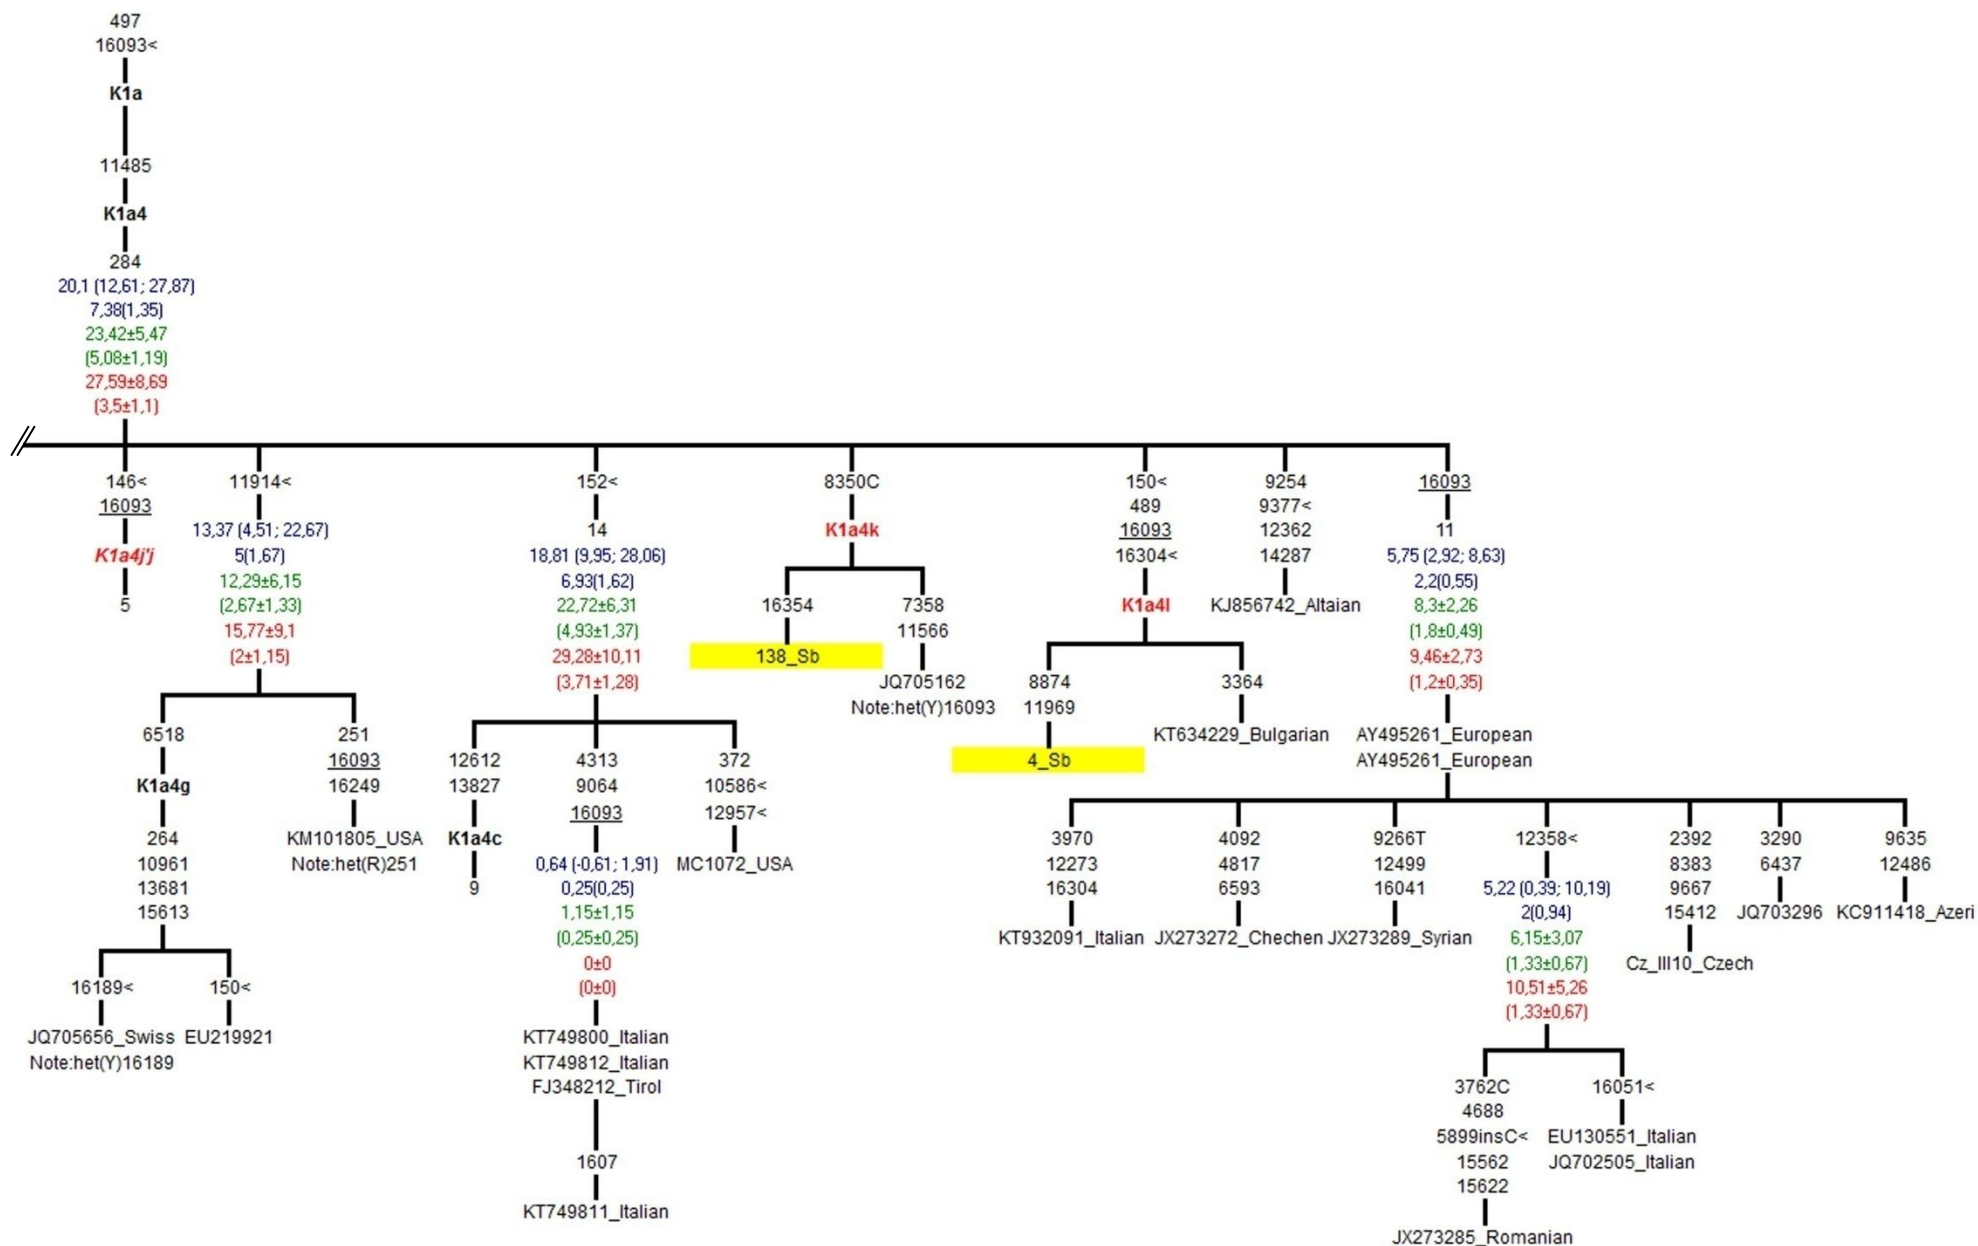

The phylogenetic tree of subhaplogroup K1a13

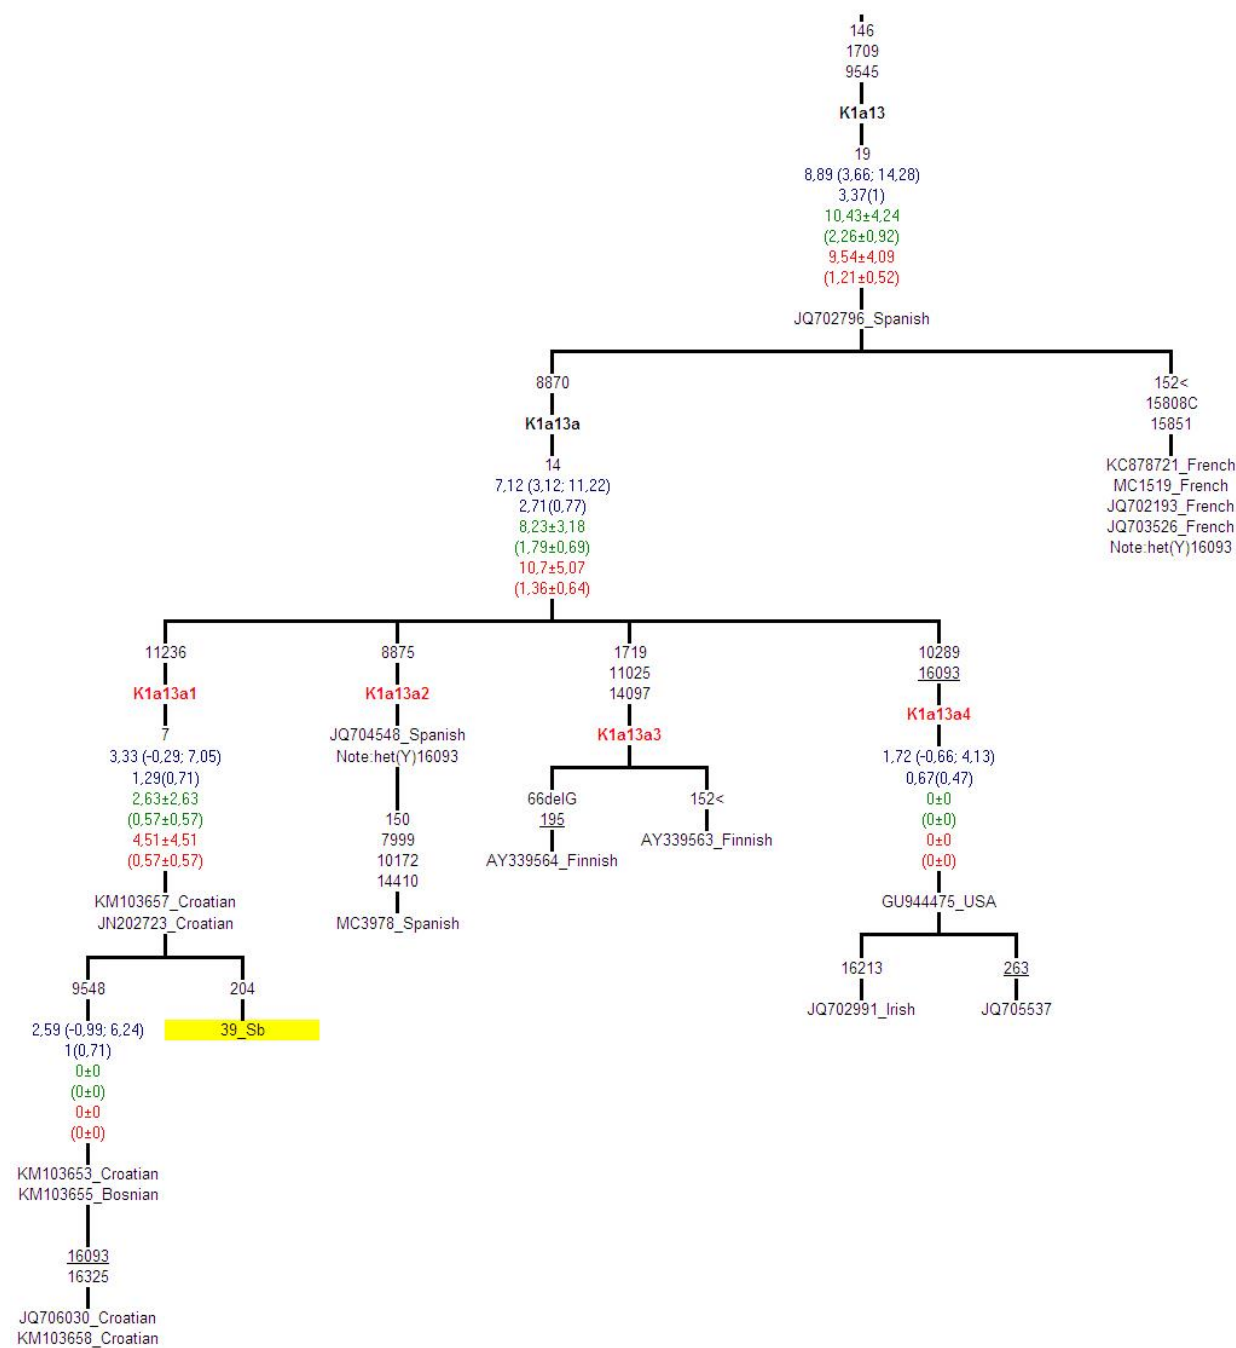

The phylogenetic tree of subhaplogroup K1a30

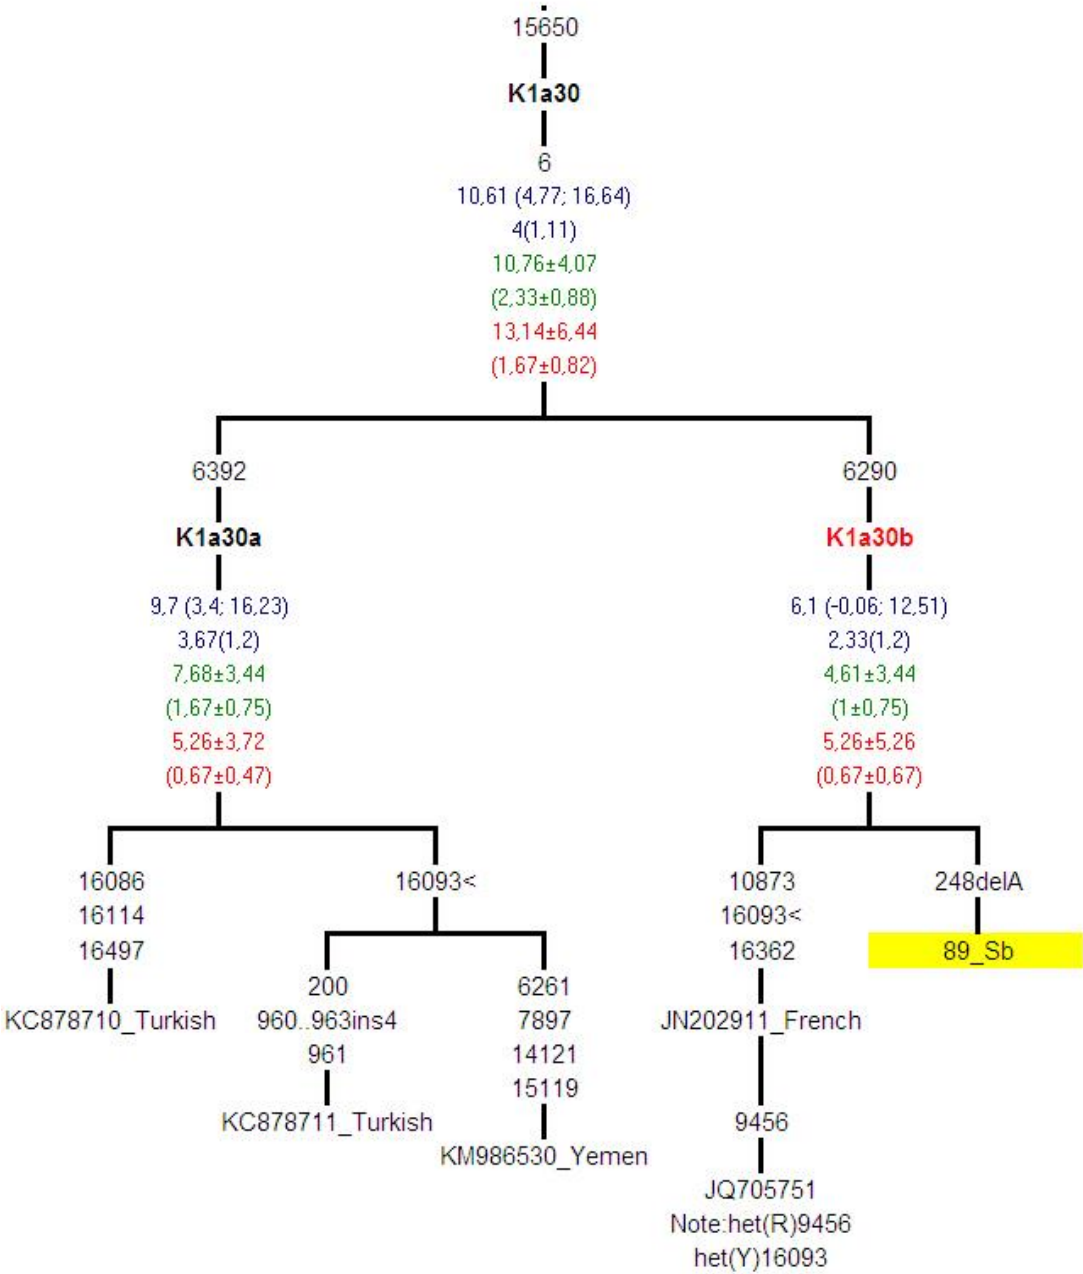

The phylogenetic tree of subhaplogroup K1b1c

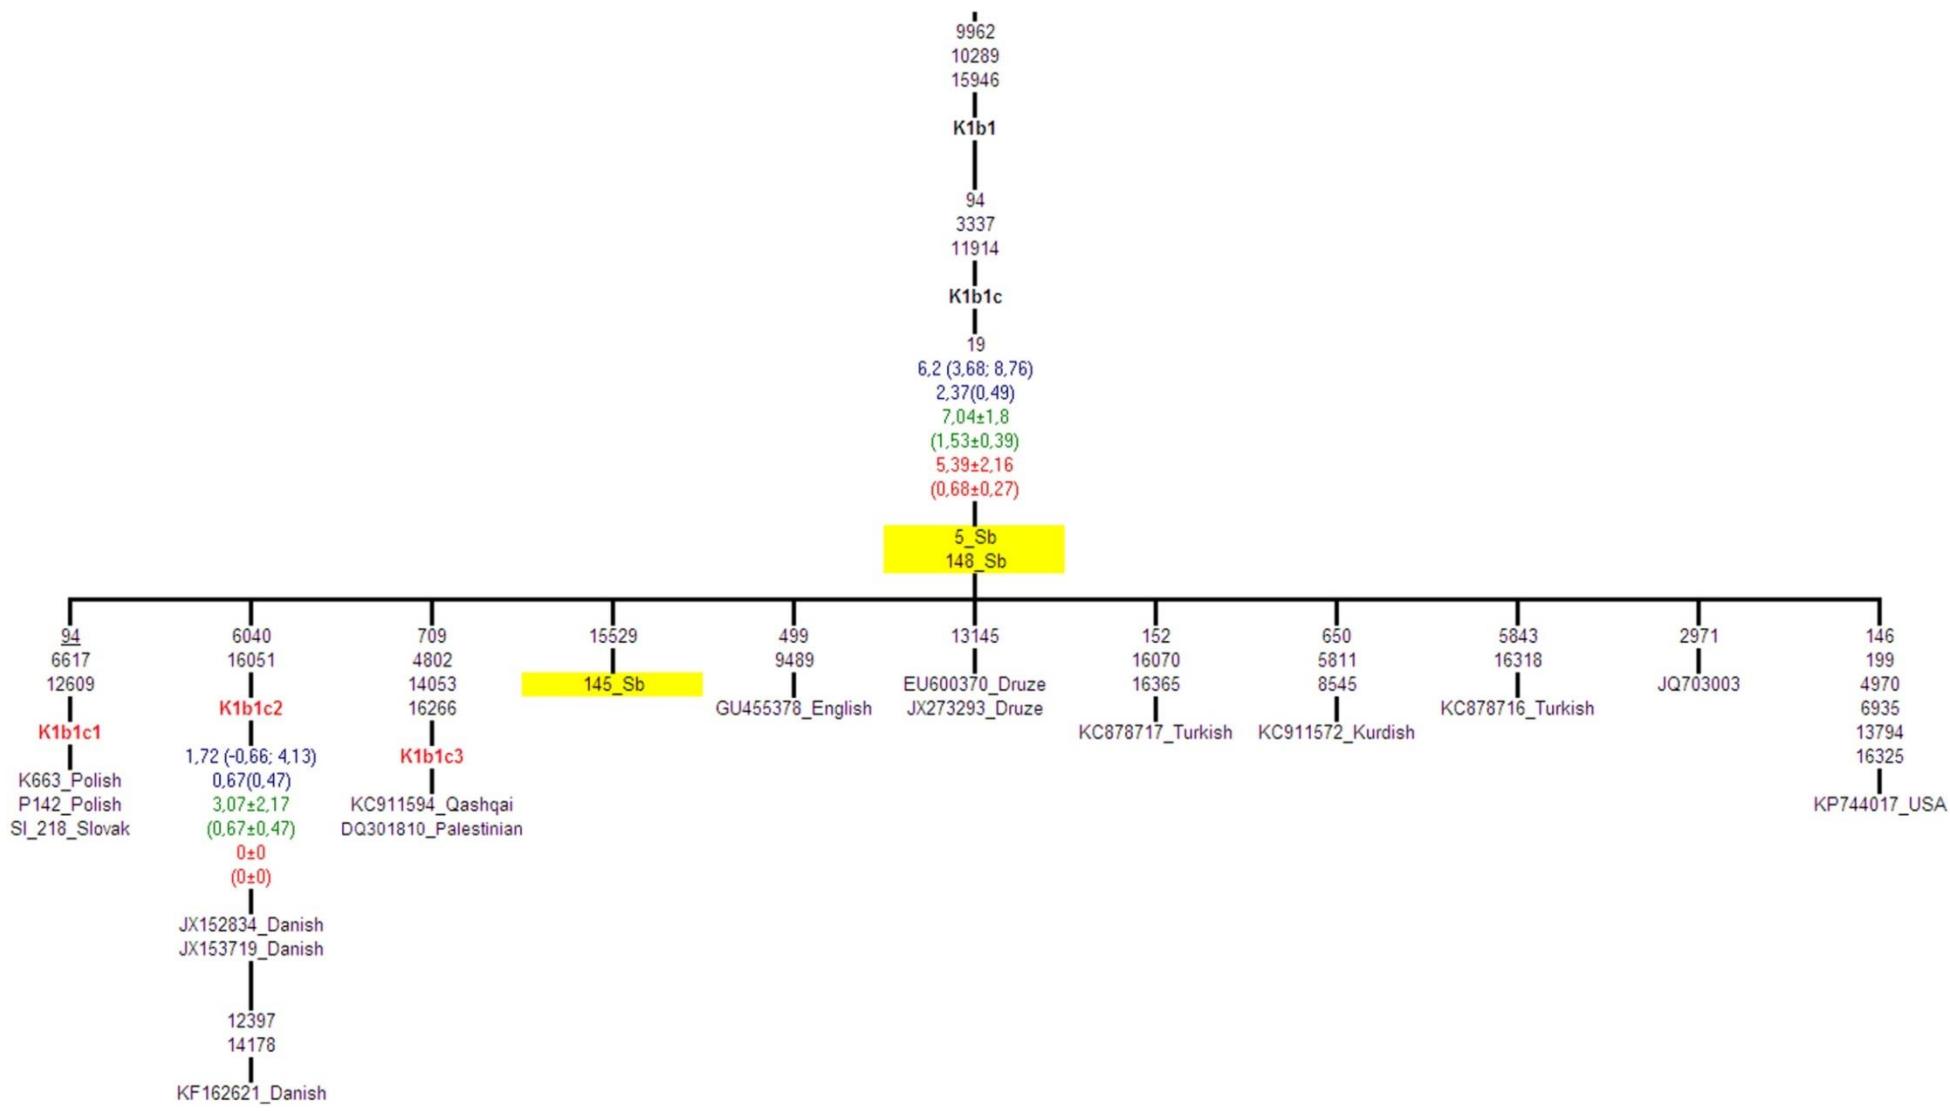

### The phylogenetic tree of subhaplogroup K1b2a2

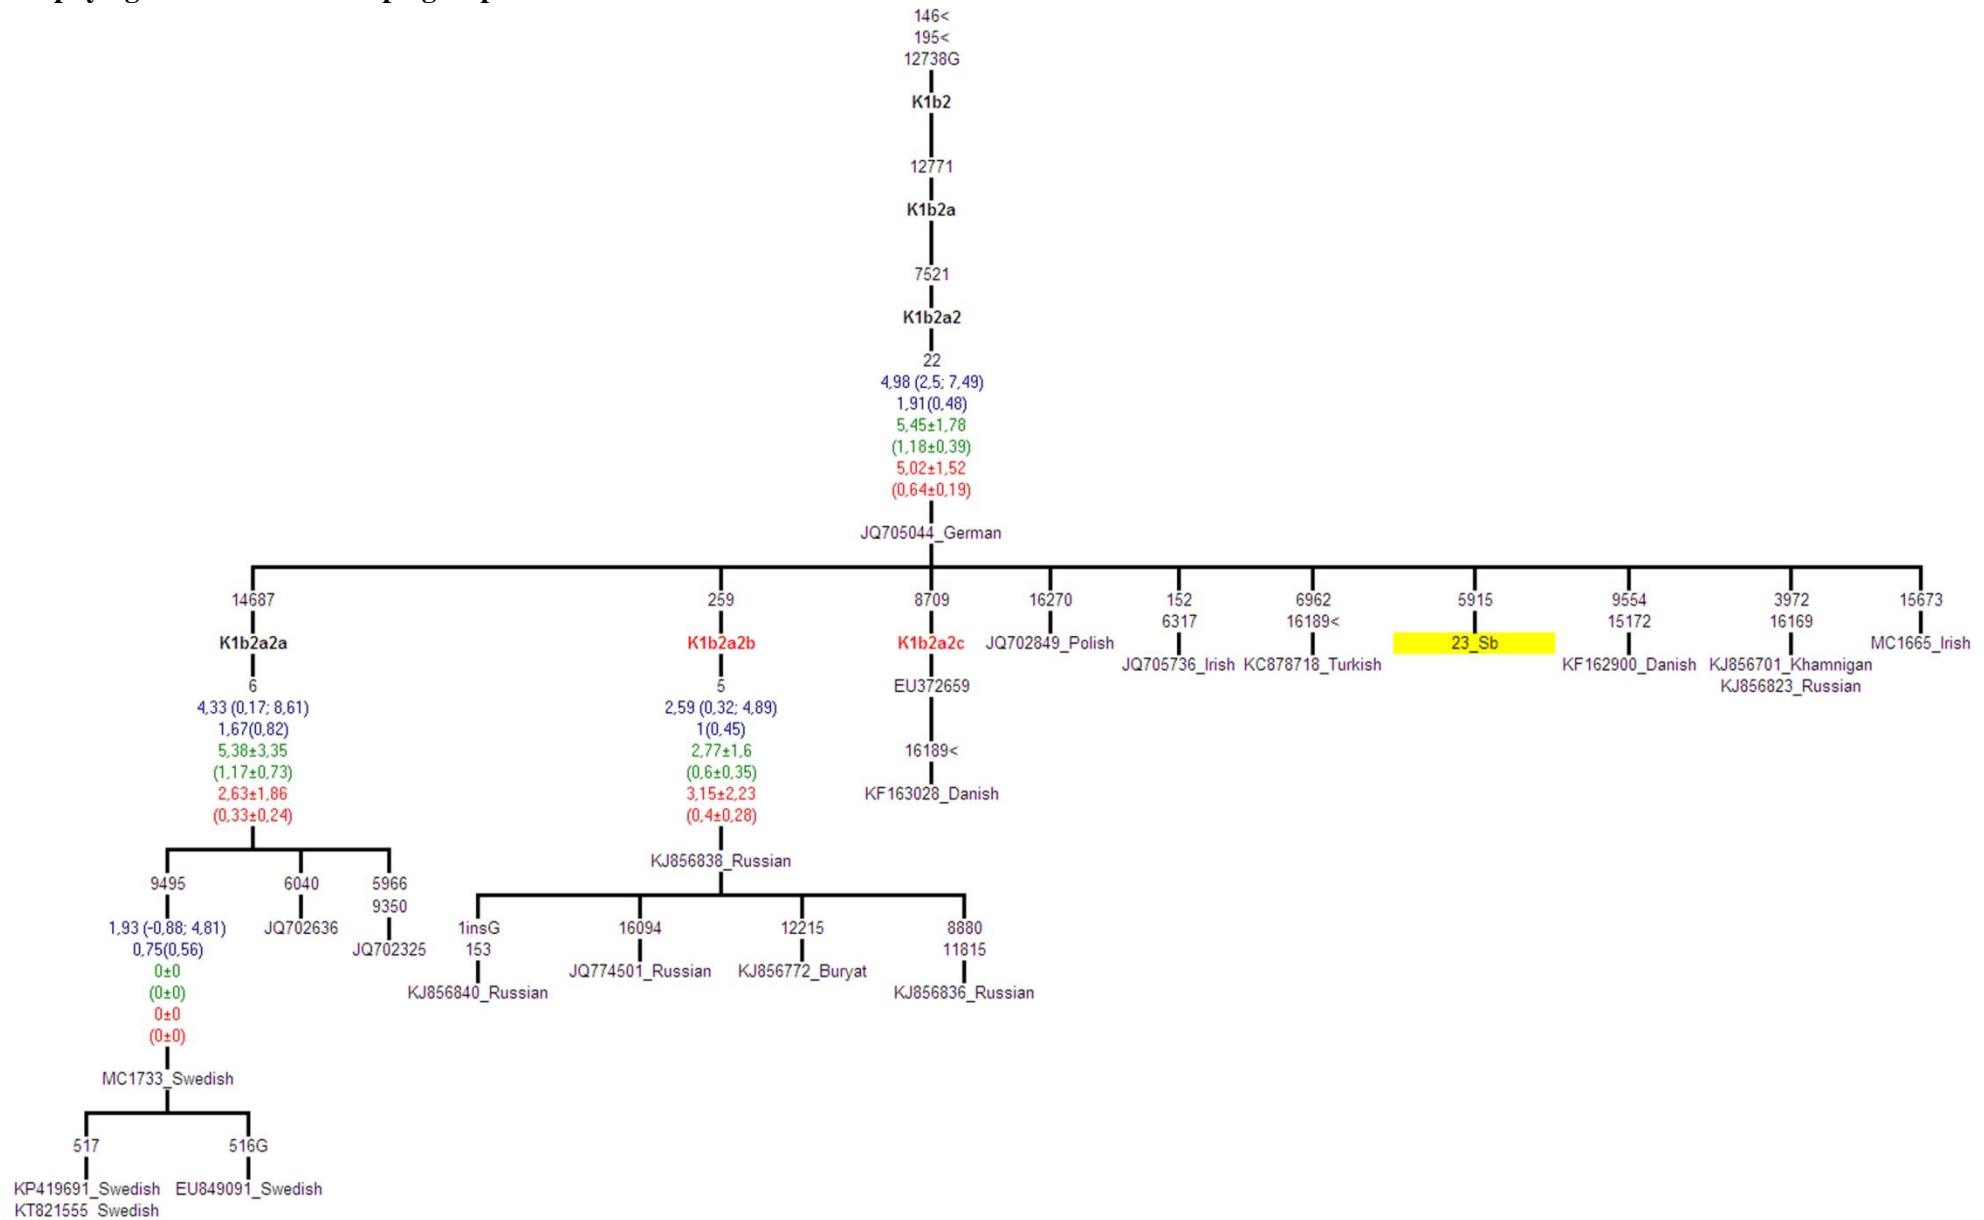



## The phylogenetic tree of subhaplogroup U1a1c

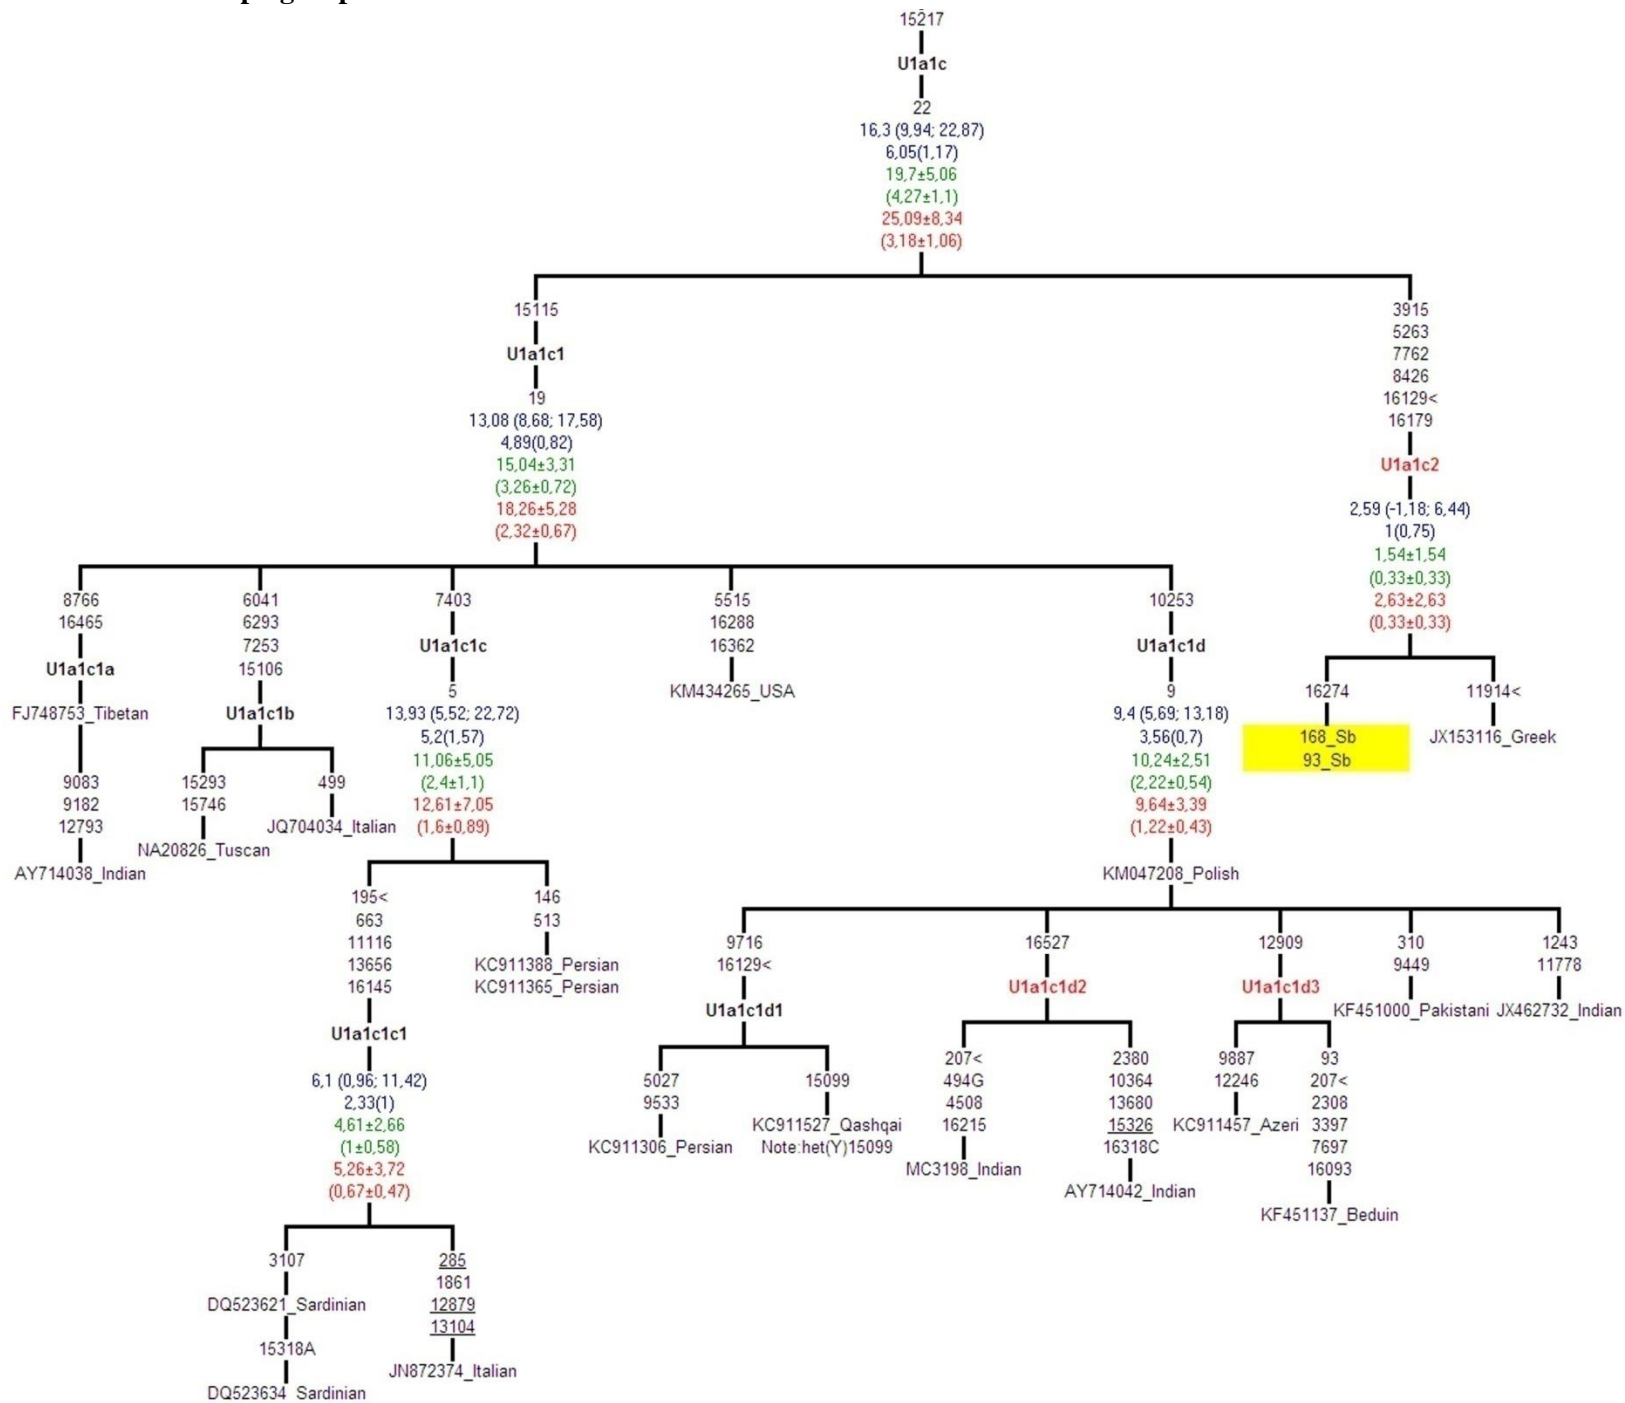

The phylogenetic tree of subhaplogroup U2e1b1

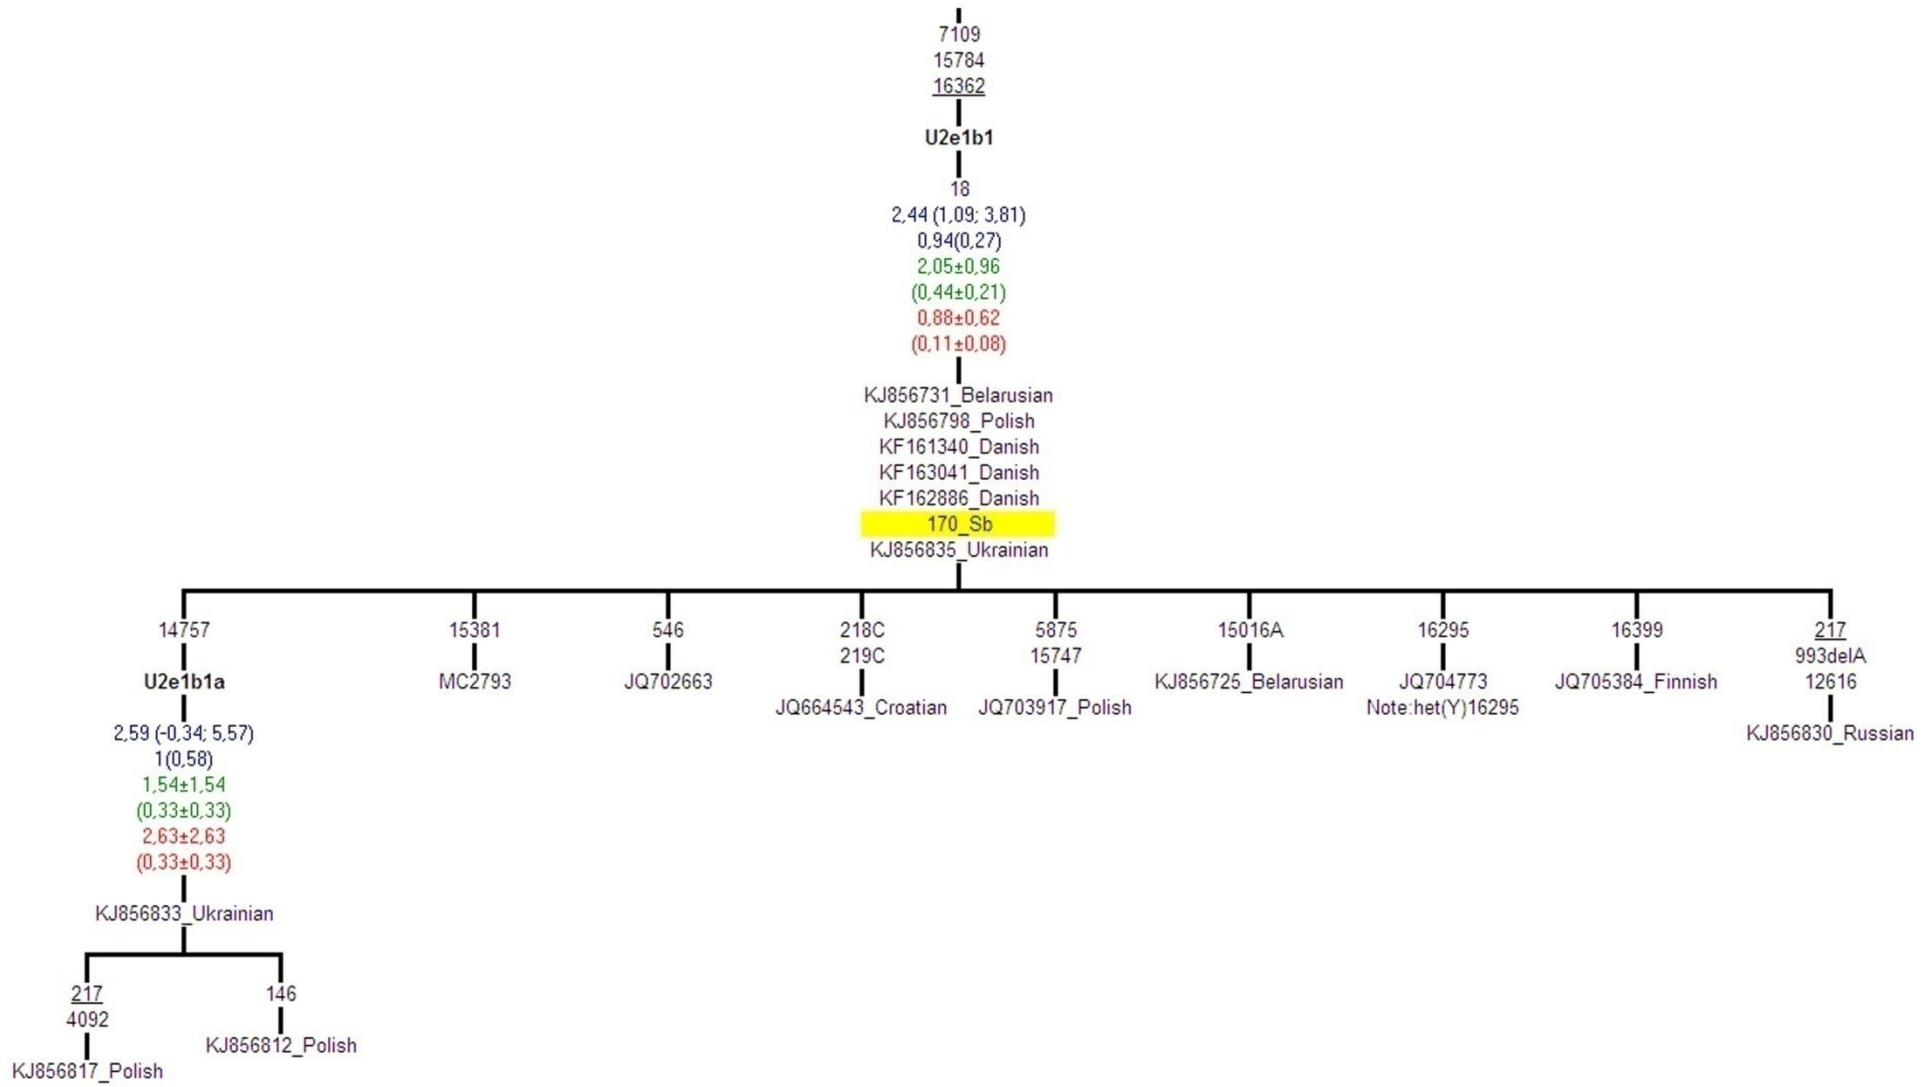

The phylogenetic tree of subhaplogroup U2e2a1d

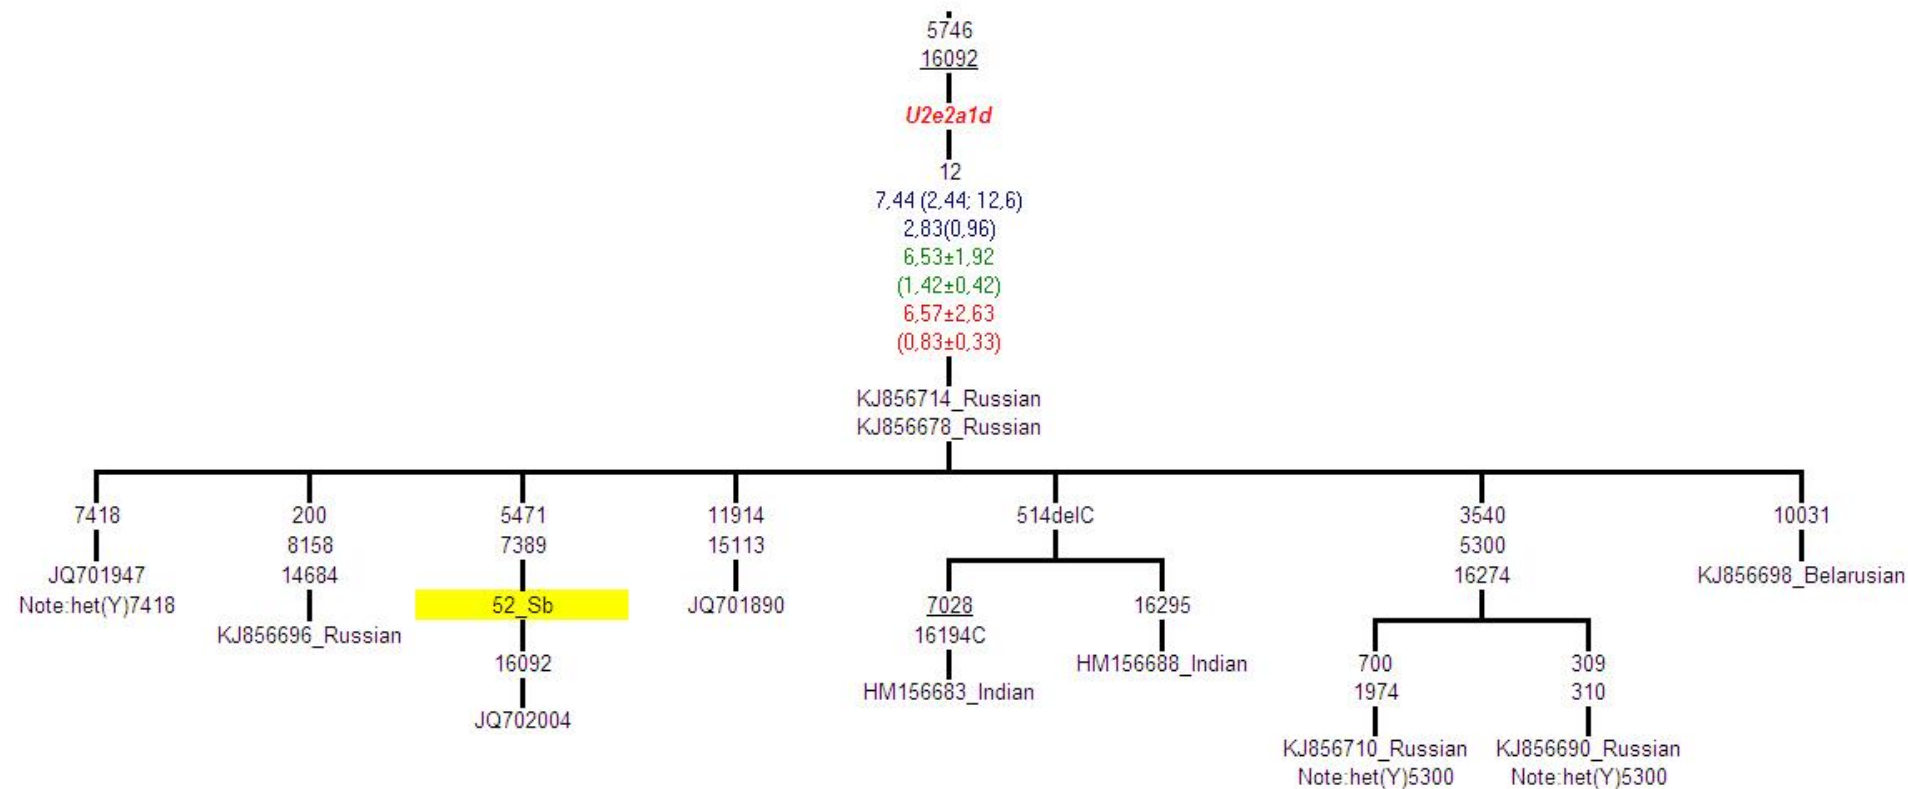

### The phylogenetic tree of subhaplogroup U3a1

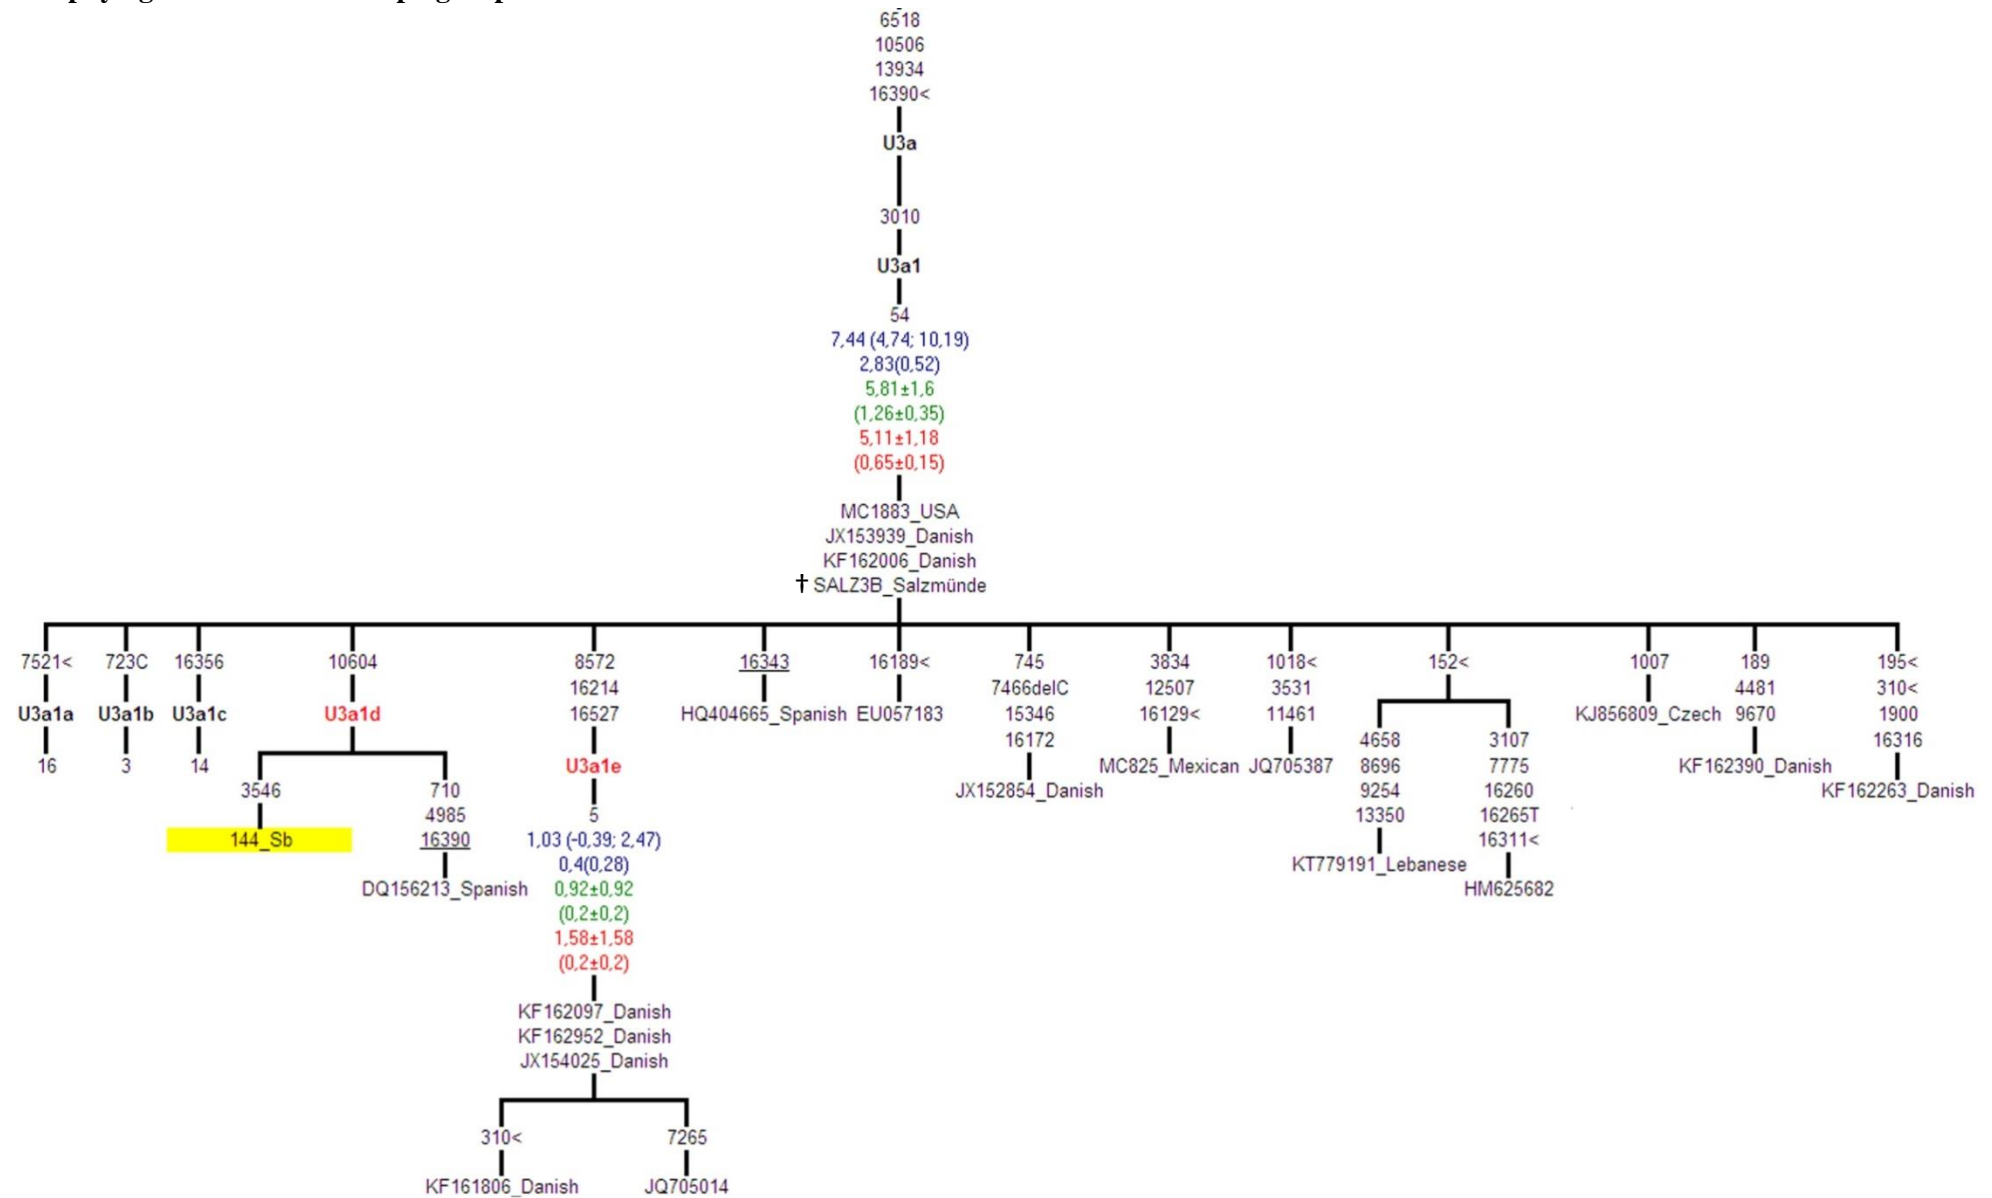

The phylogenetic tree of subhaplogroup U3a3

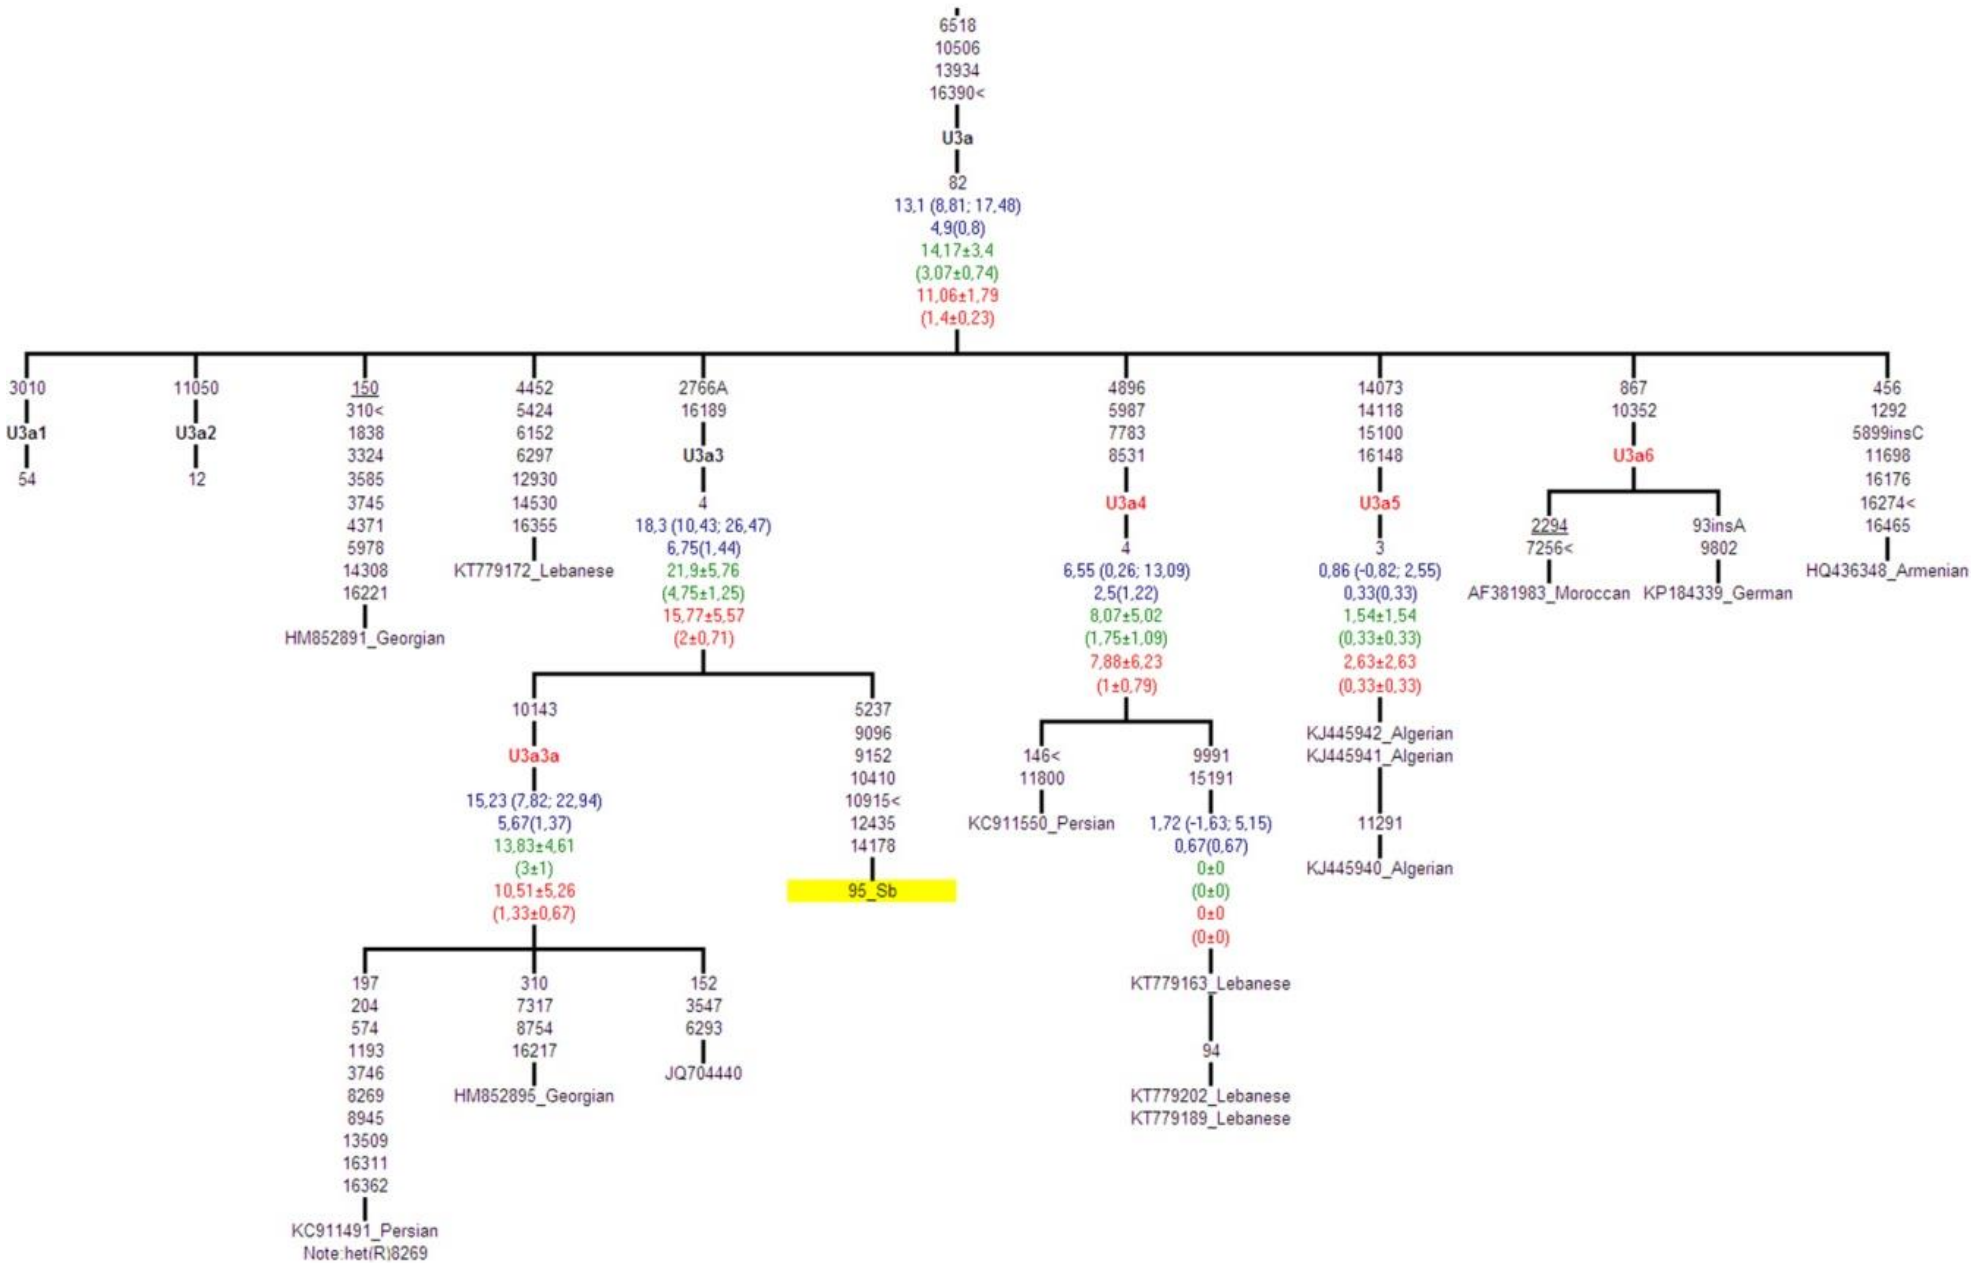

**The phylogenetic tree of subhaplogroup U4a2 (to be continued)**

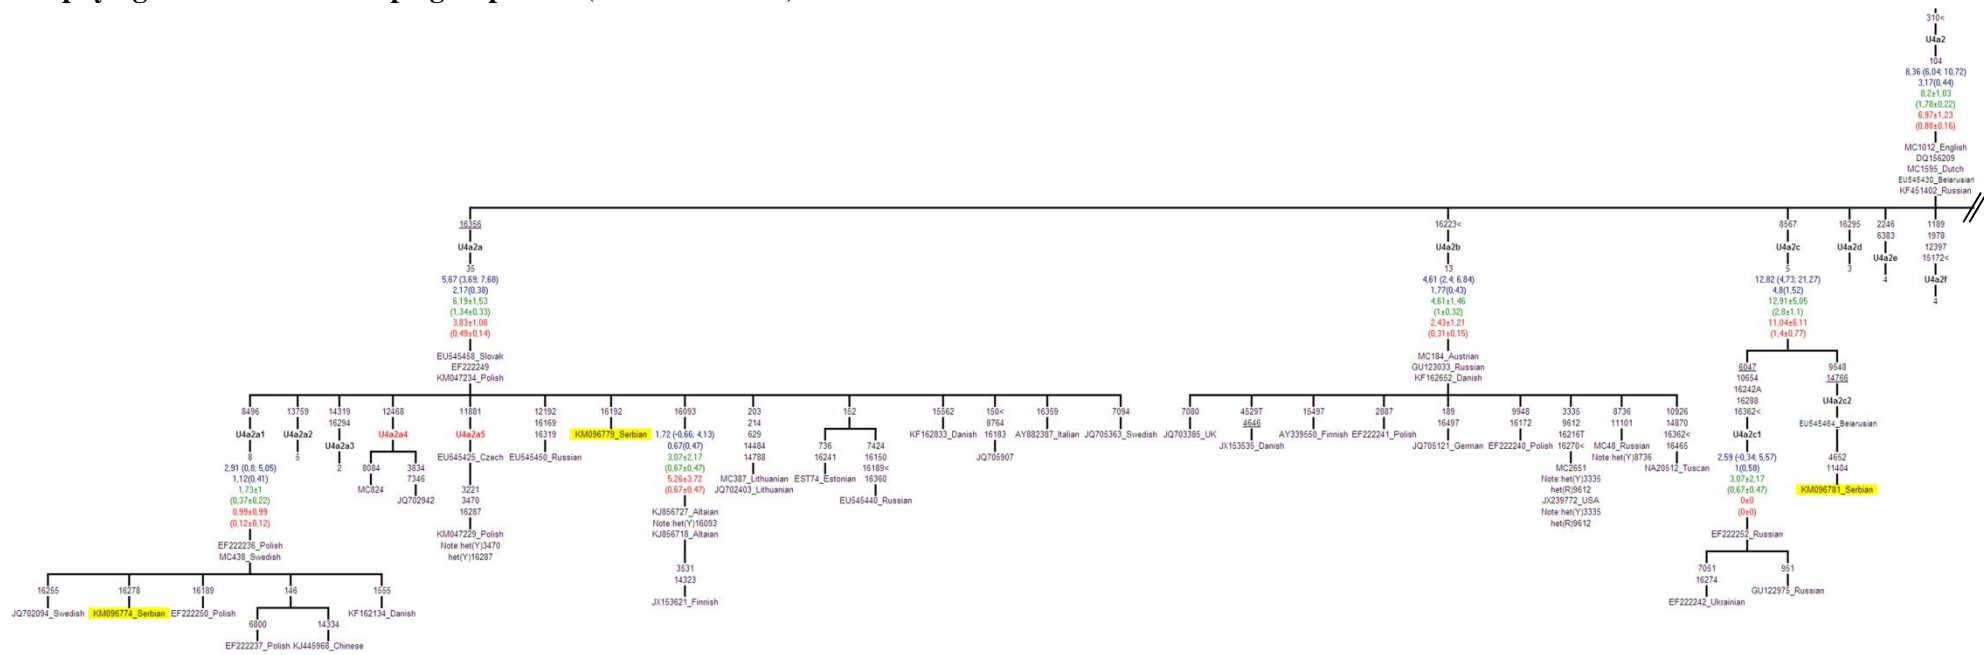

**The phylogenetic tree of subhaplogroup U4a2 (continued)**

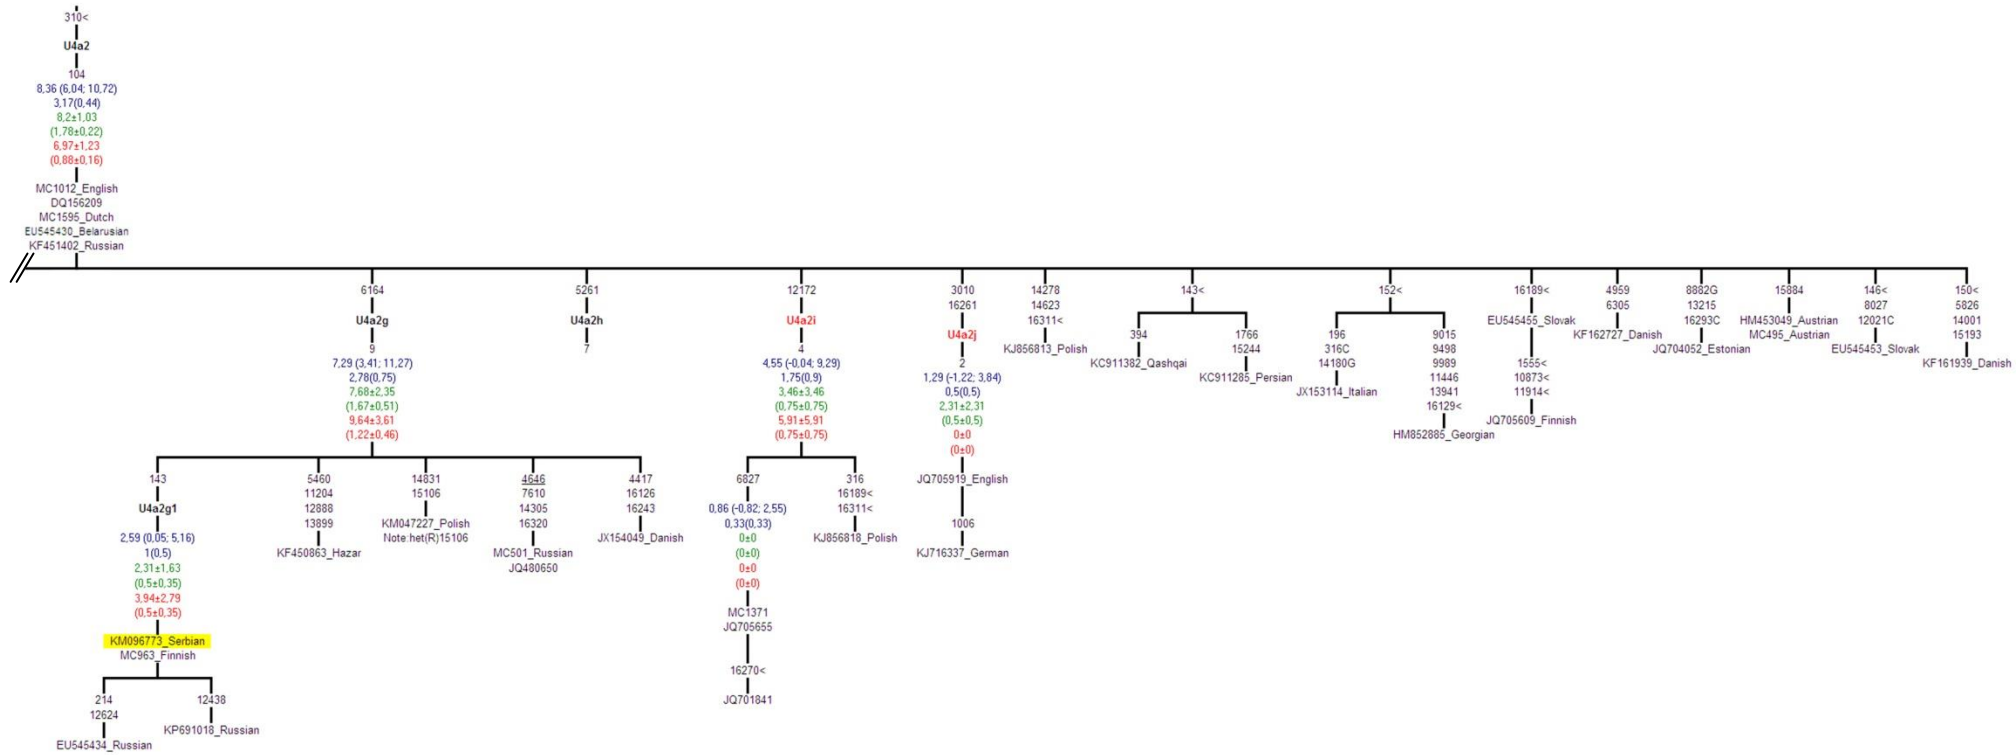

### The phylogenetic tree of subhaplogroup U4b

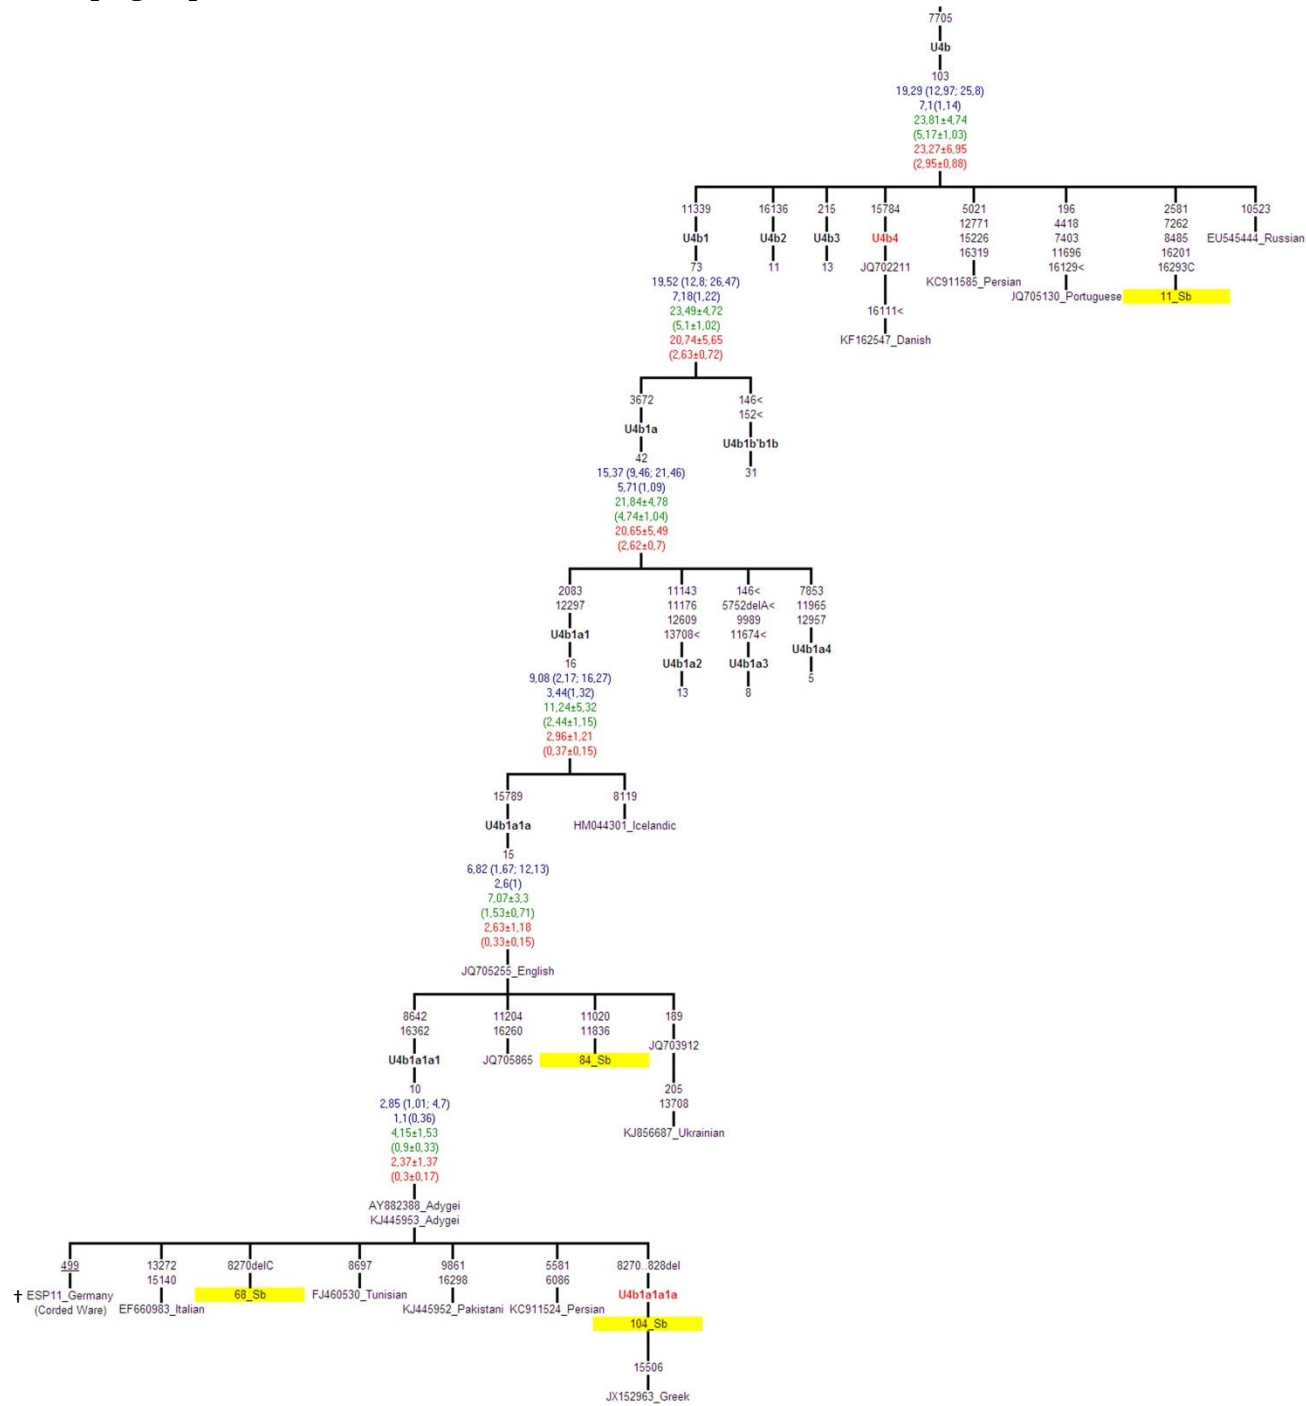



**The phylogenetic tree of subhaplogroup U4c1 (to be continued)**

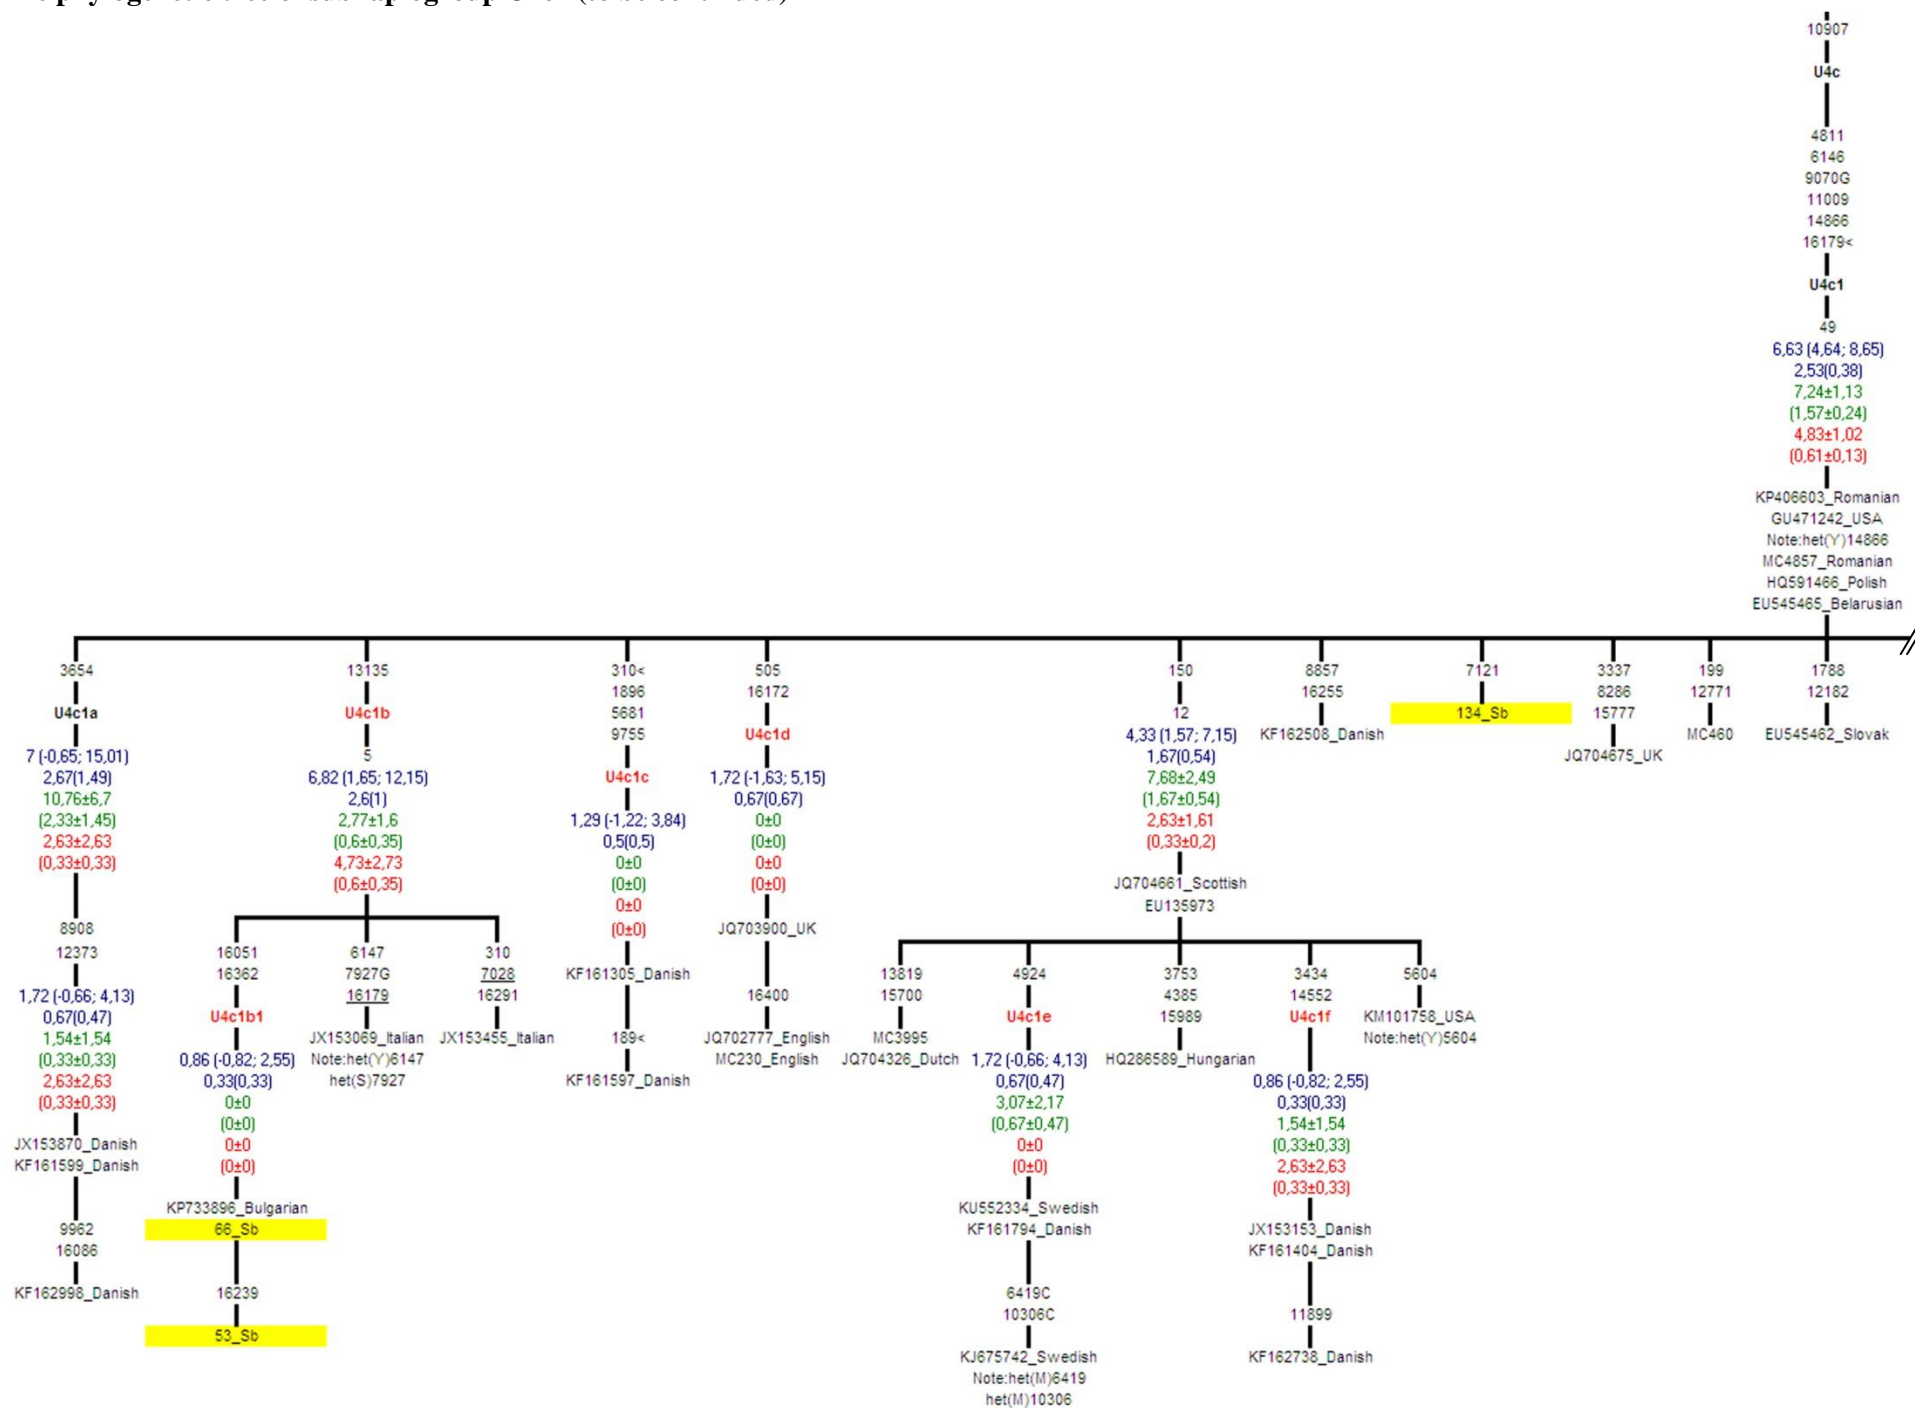

The phylogenetic tree of subhaplogroup U4c1 (continued)

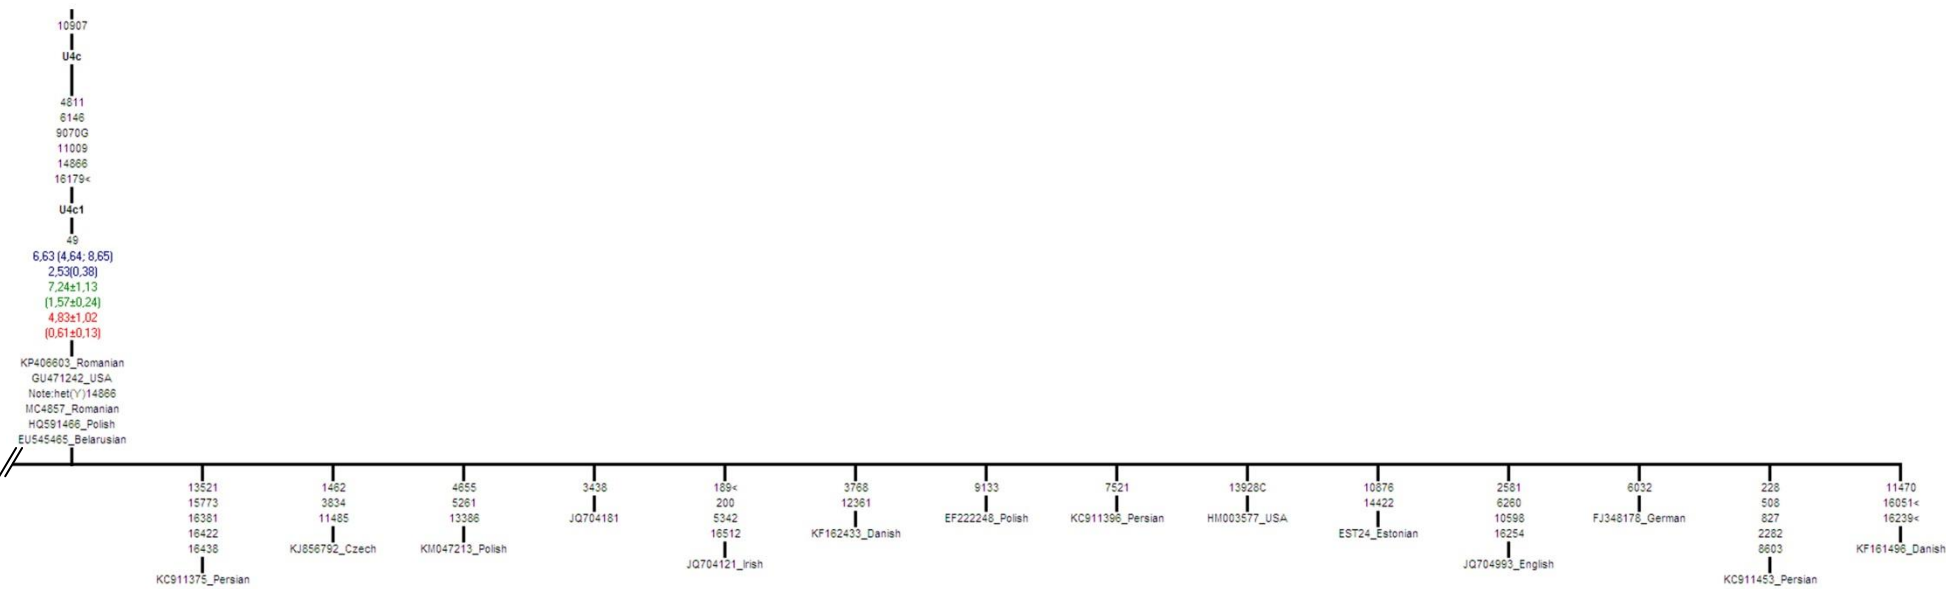

## The phylogenetic tree of subhaplogroup U4d2

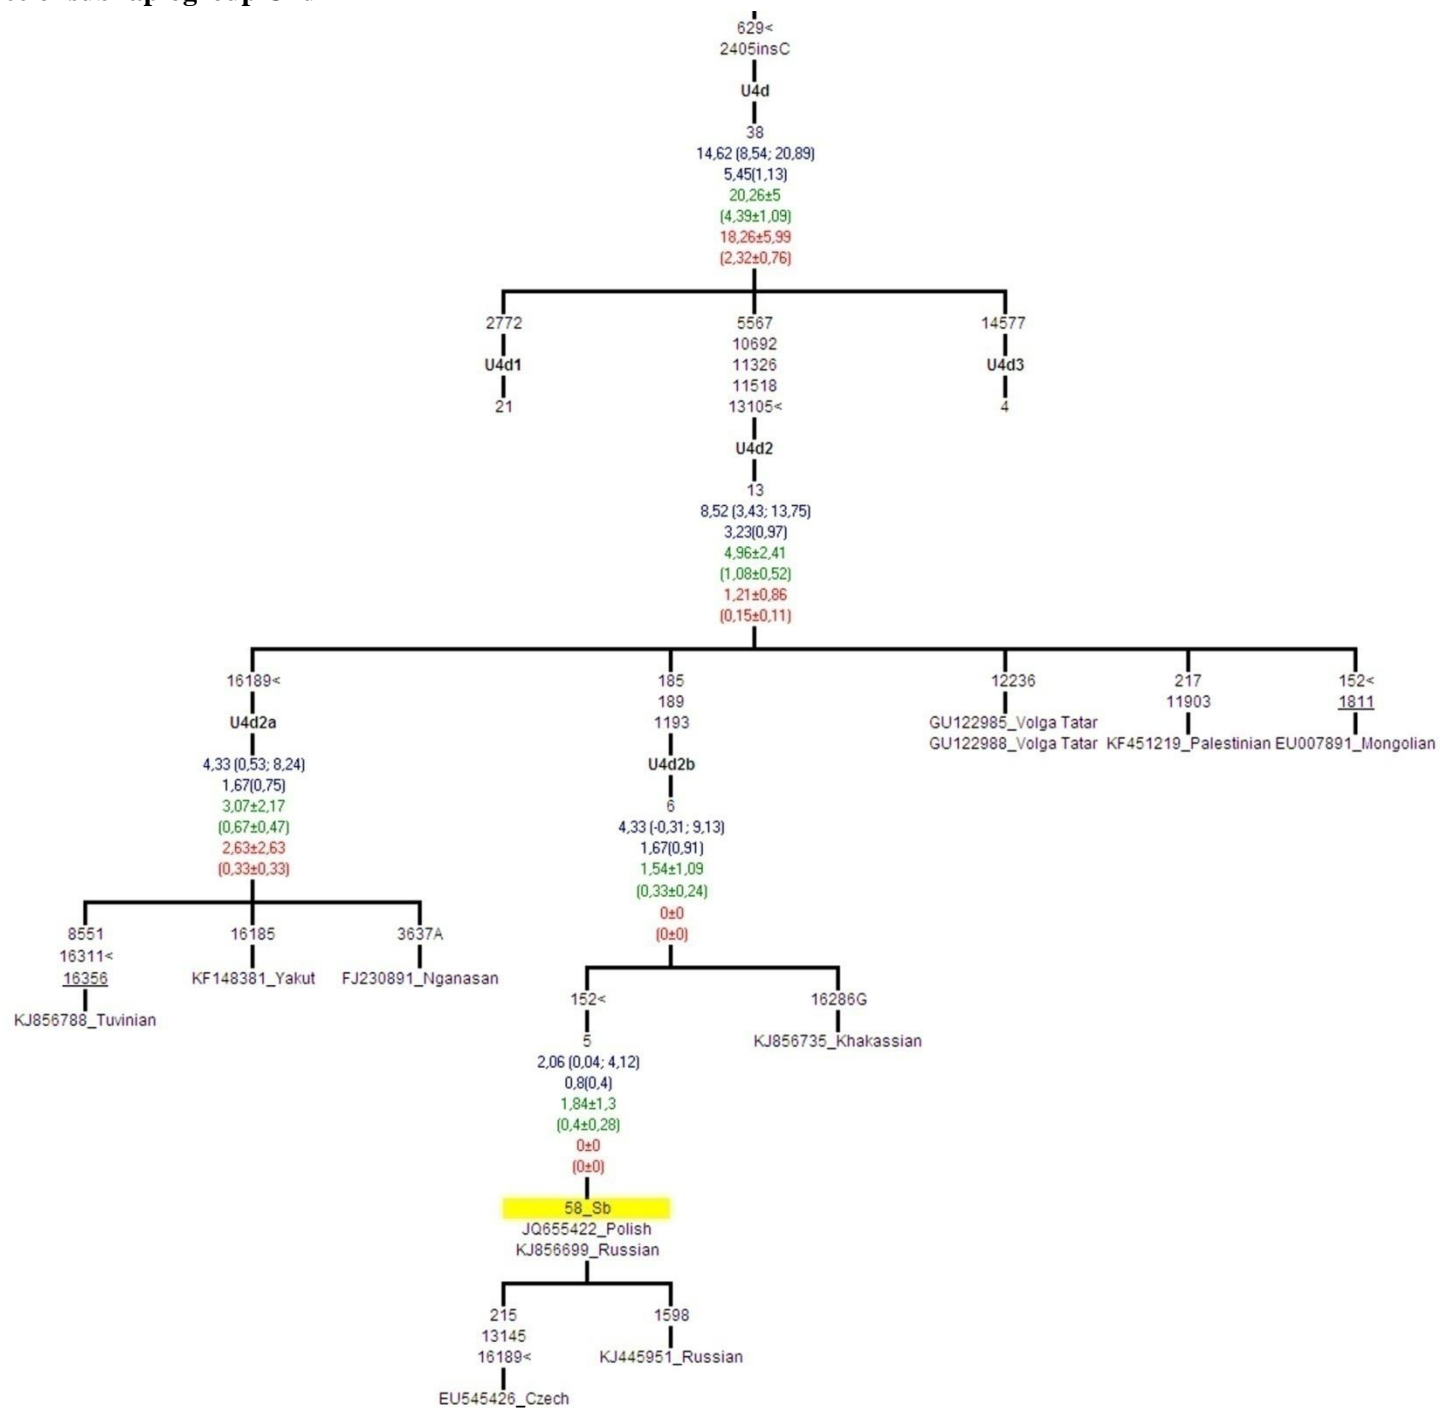

**The phylogenetic tree of subhaplogroup U5a1a1 (continued)**

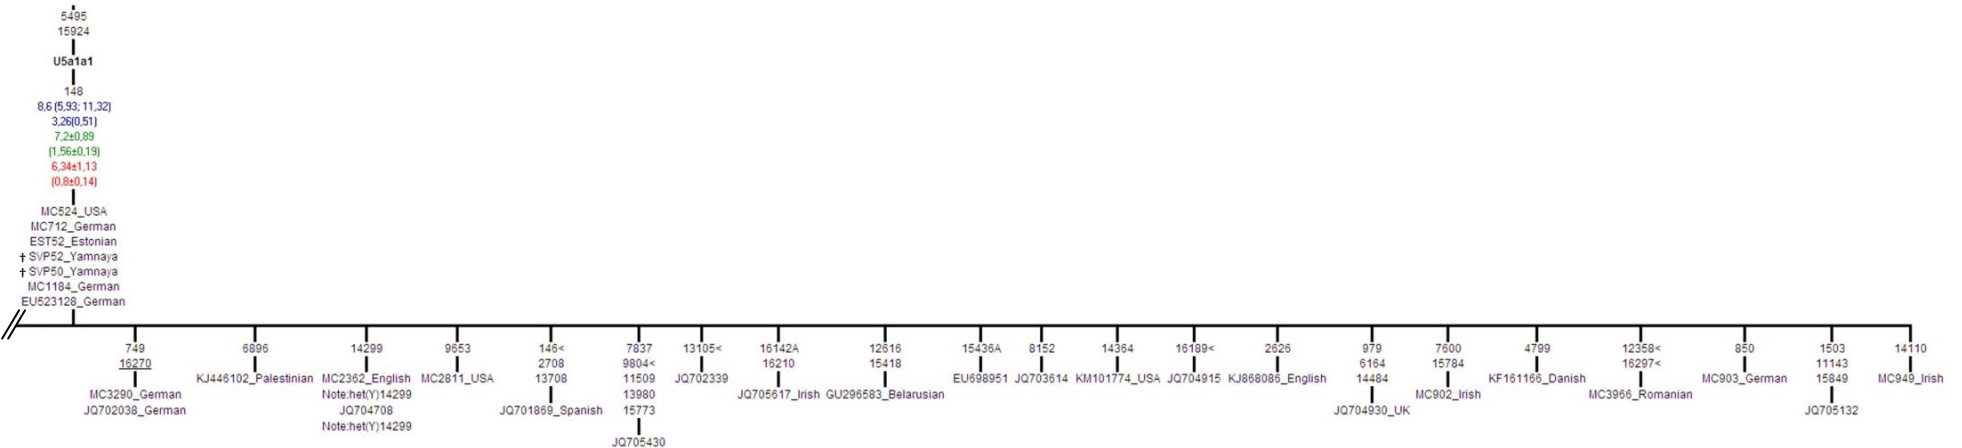

The phylogenetic tree of subhaplogroup U5a1a2a

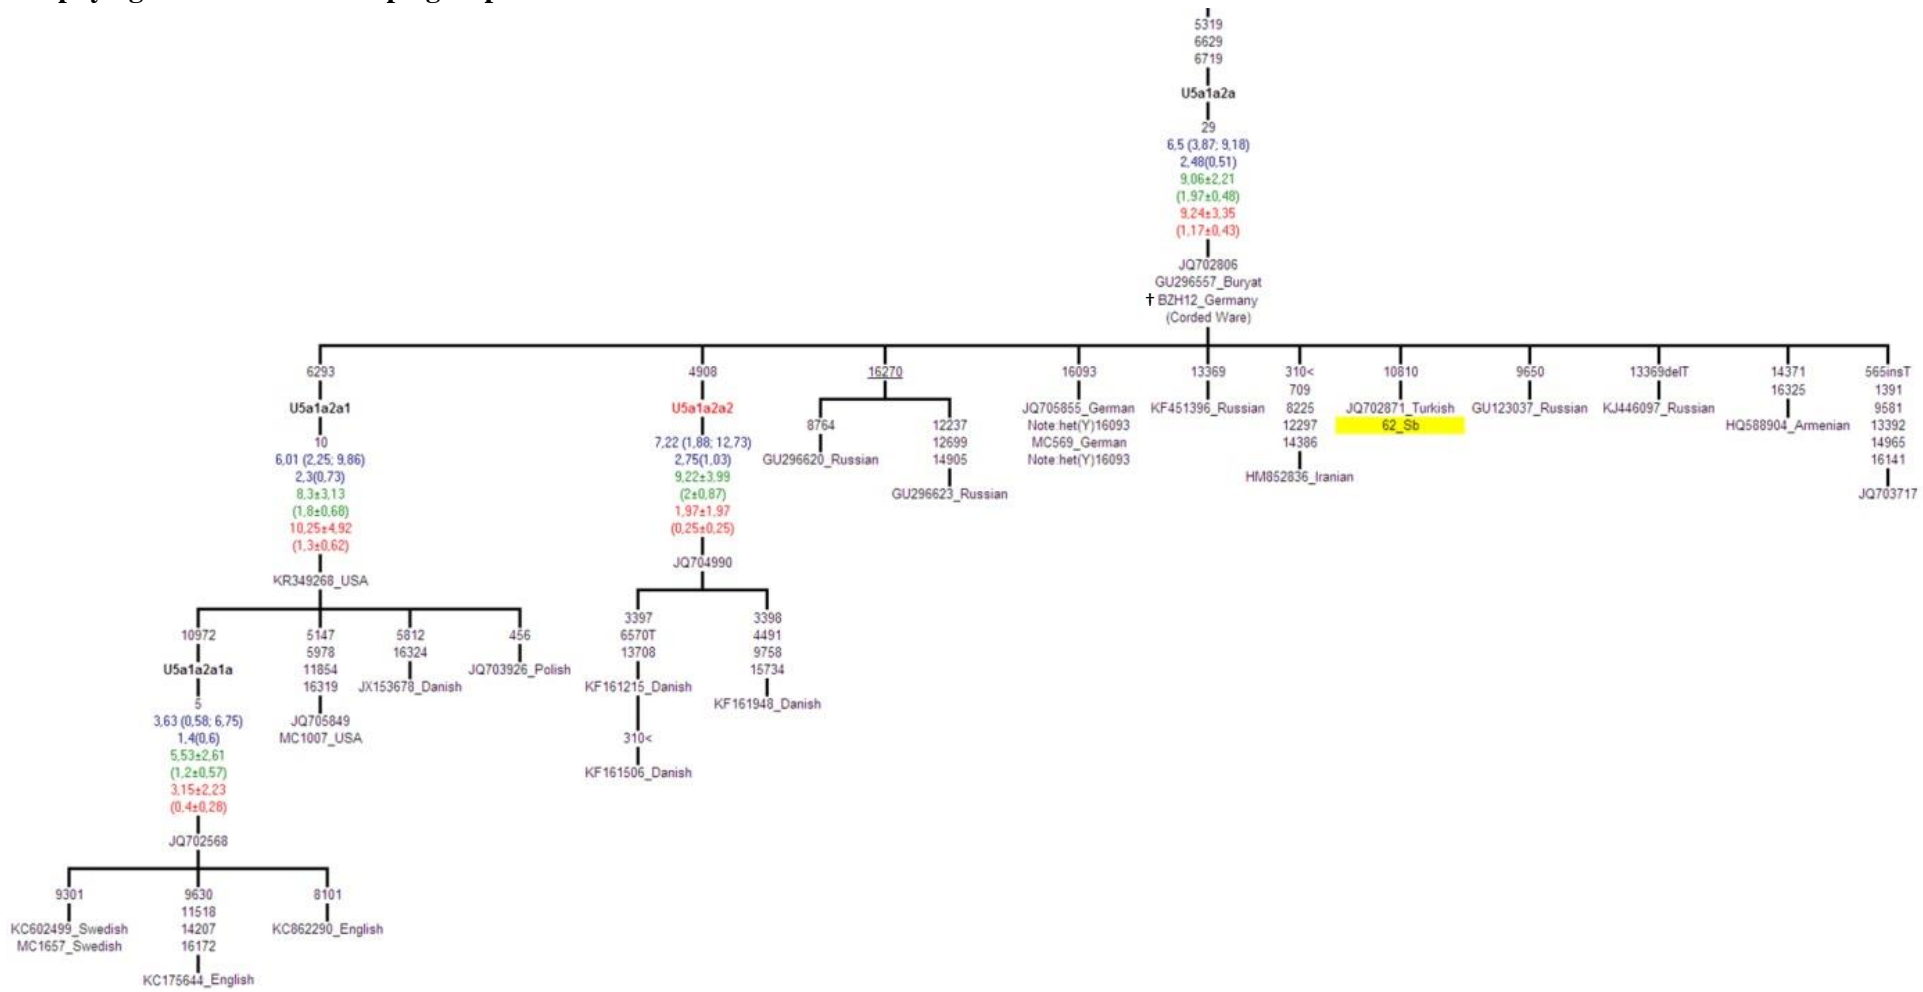

### The phylogenetic tree of subhaplogroup U5a2b

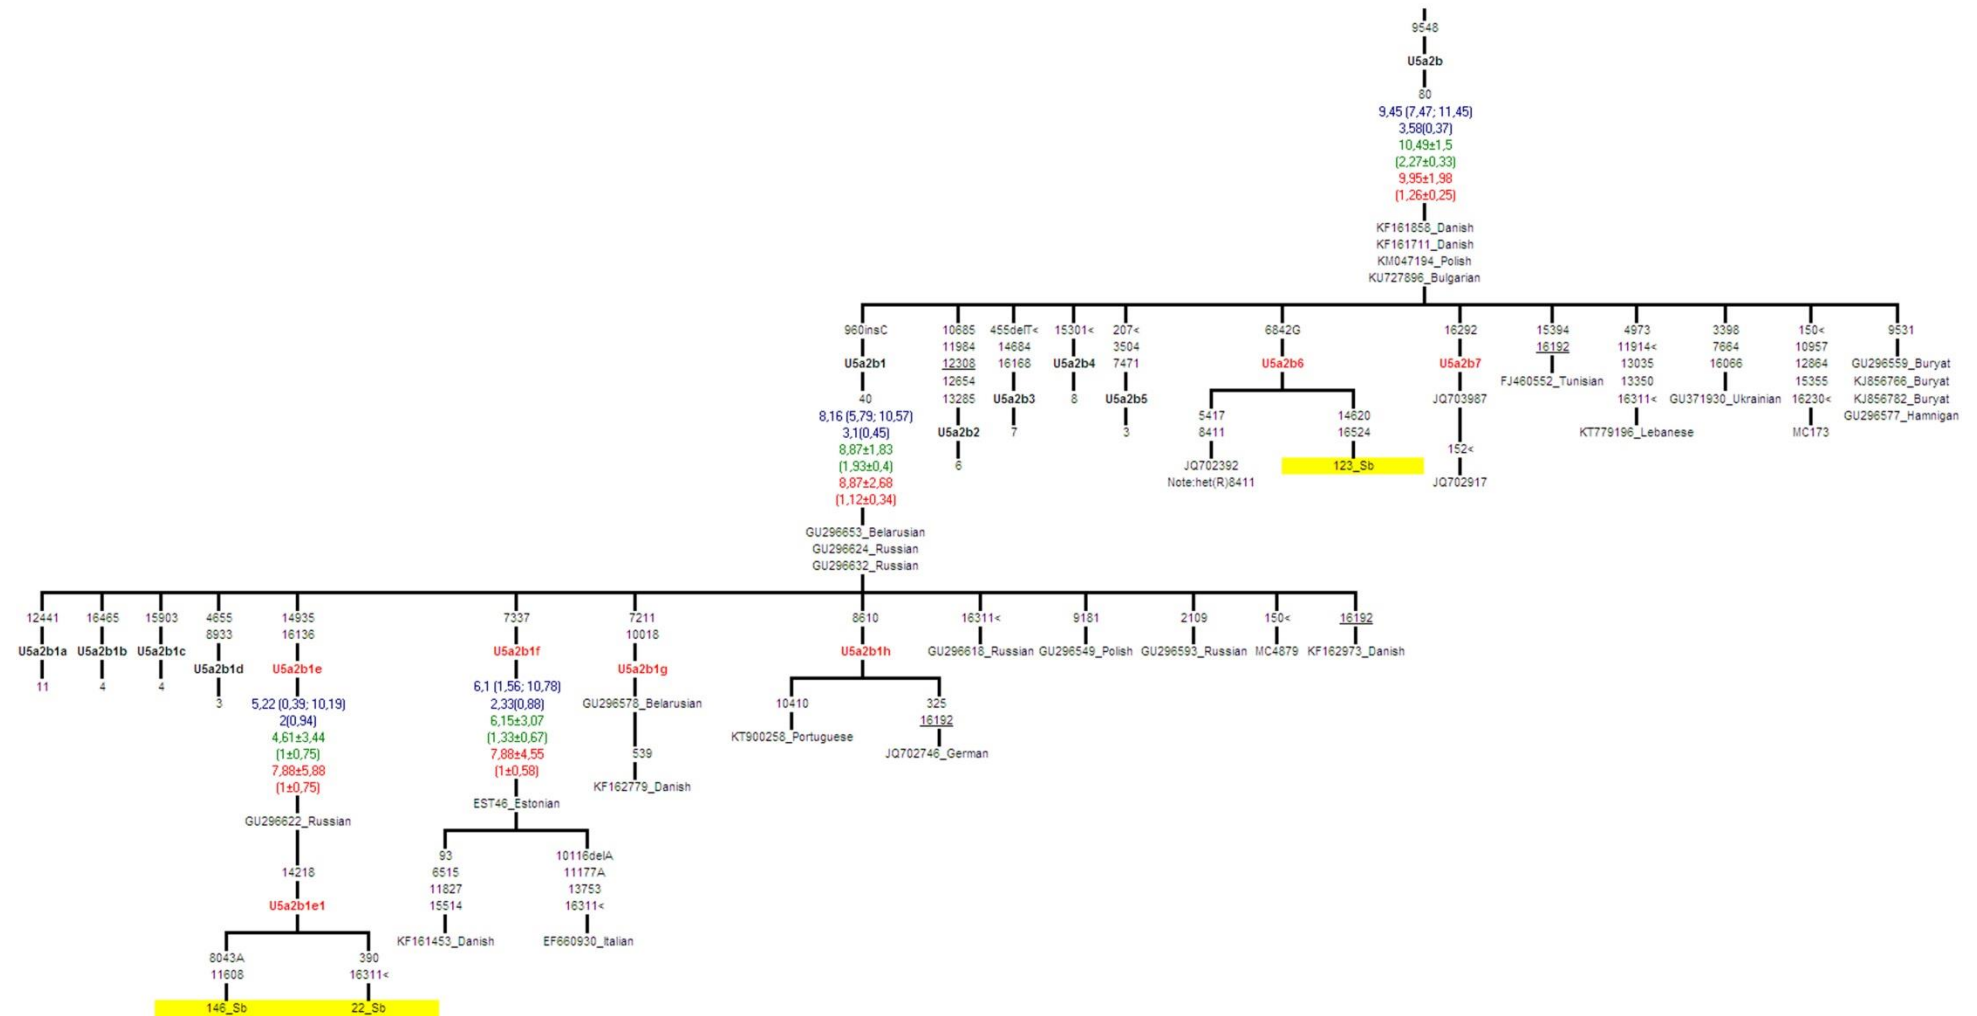

The phylogenetic tree of subhaplogroup U5b1a

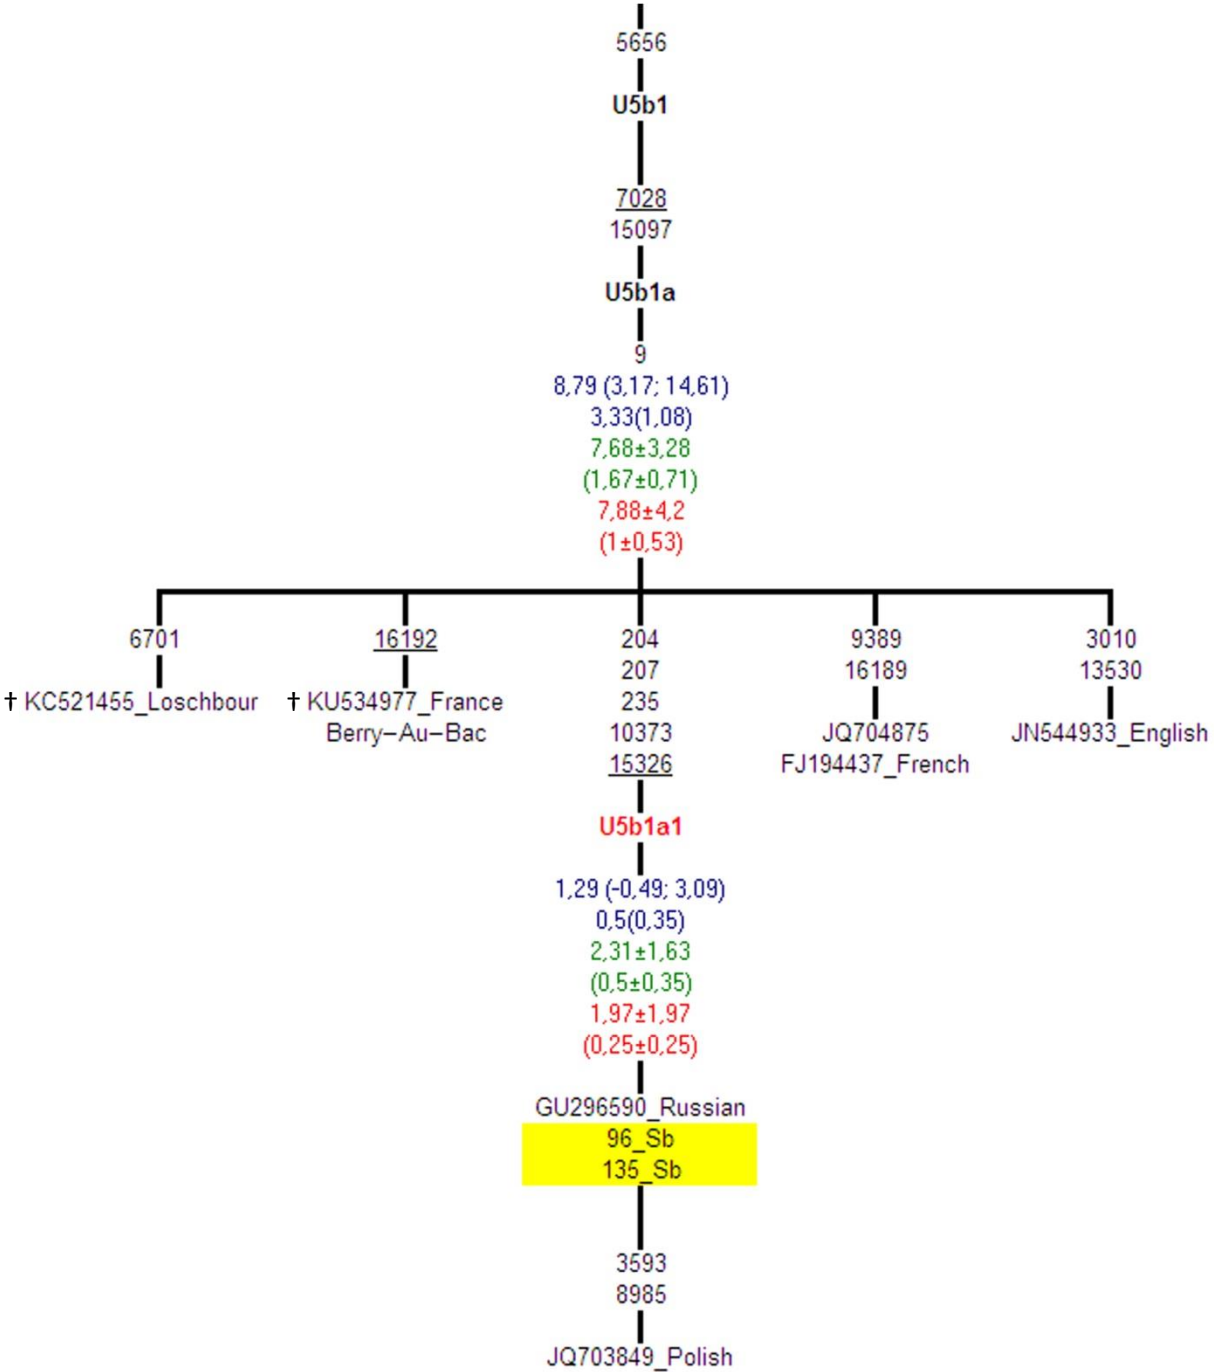

The phylogenetic tree of subhaplogroup U5b1e'h

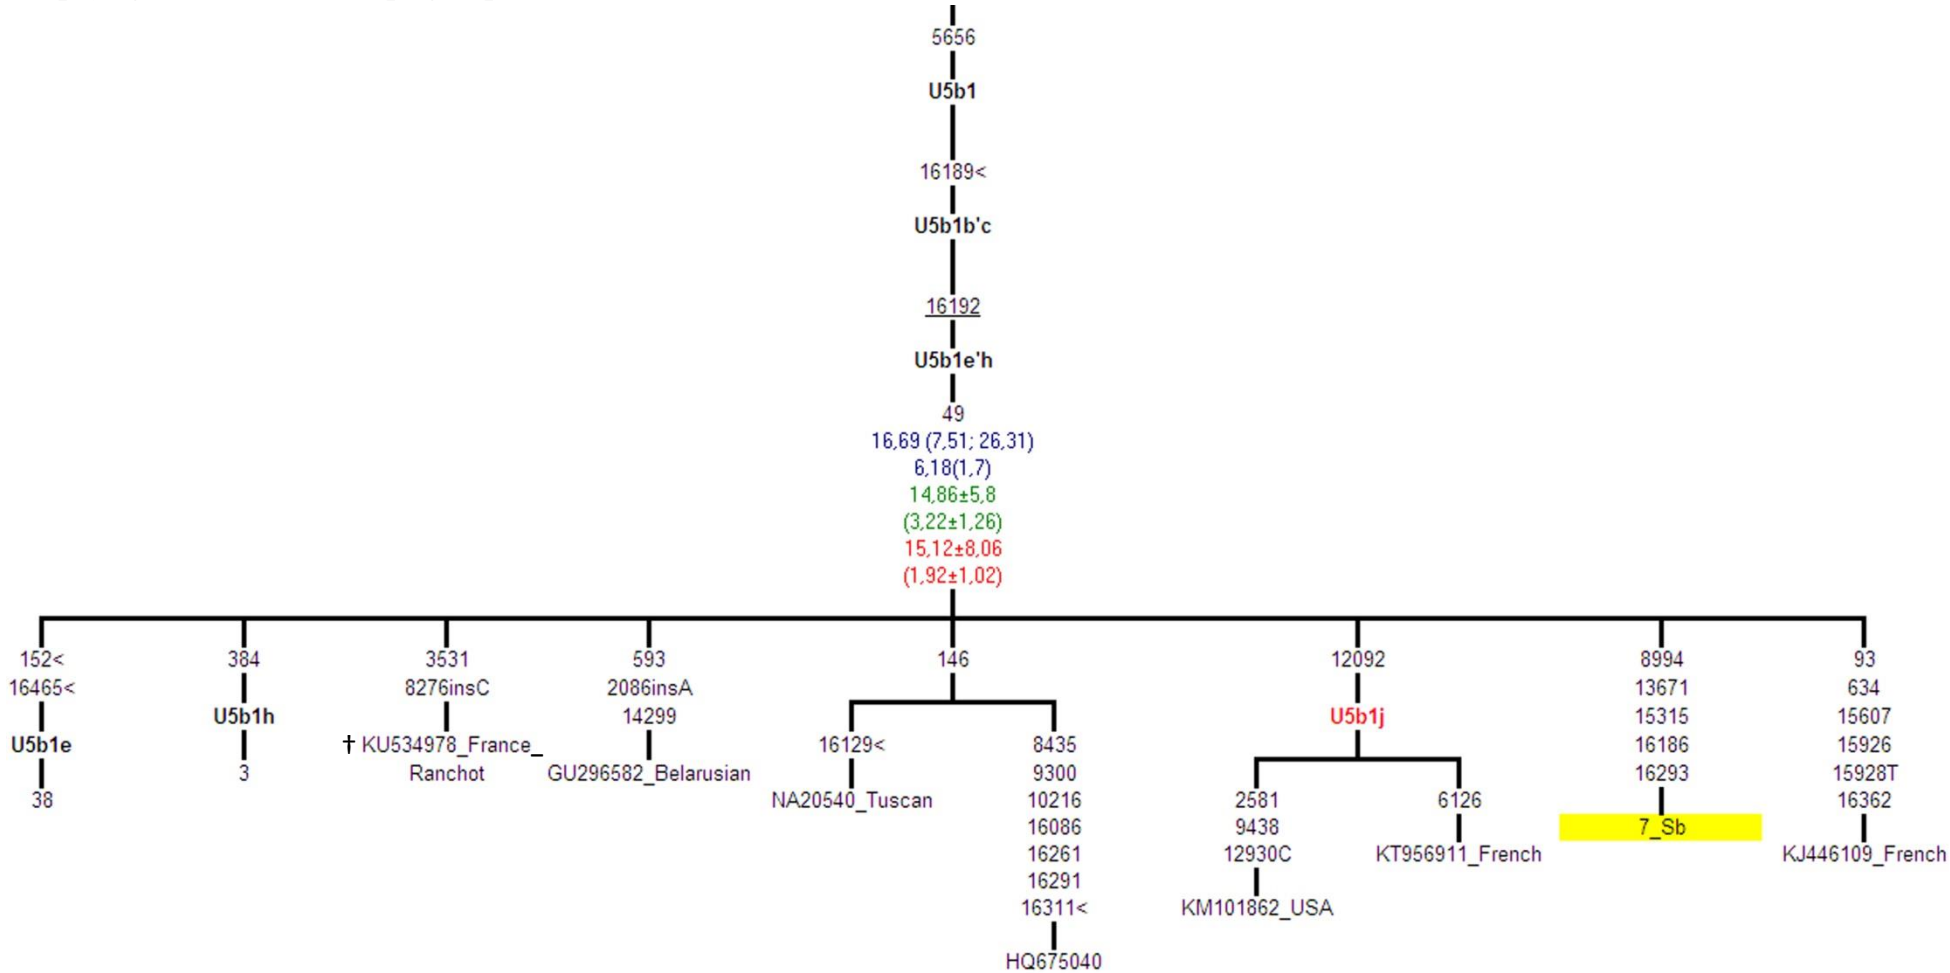



The phylogenetic tree of subhaplogroup U5b3

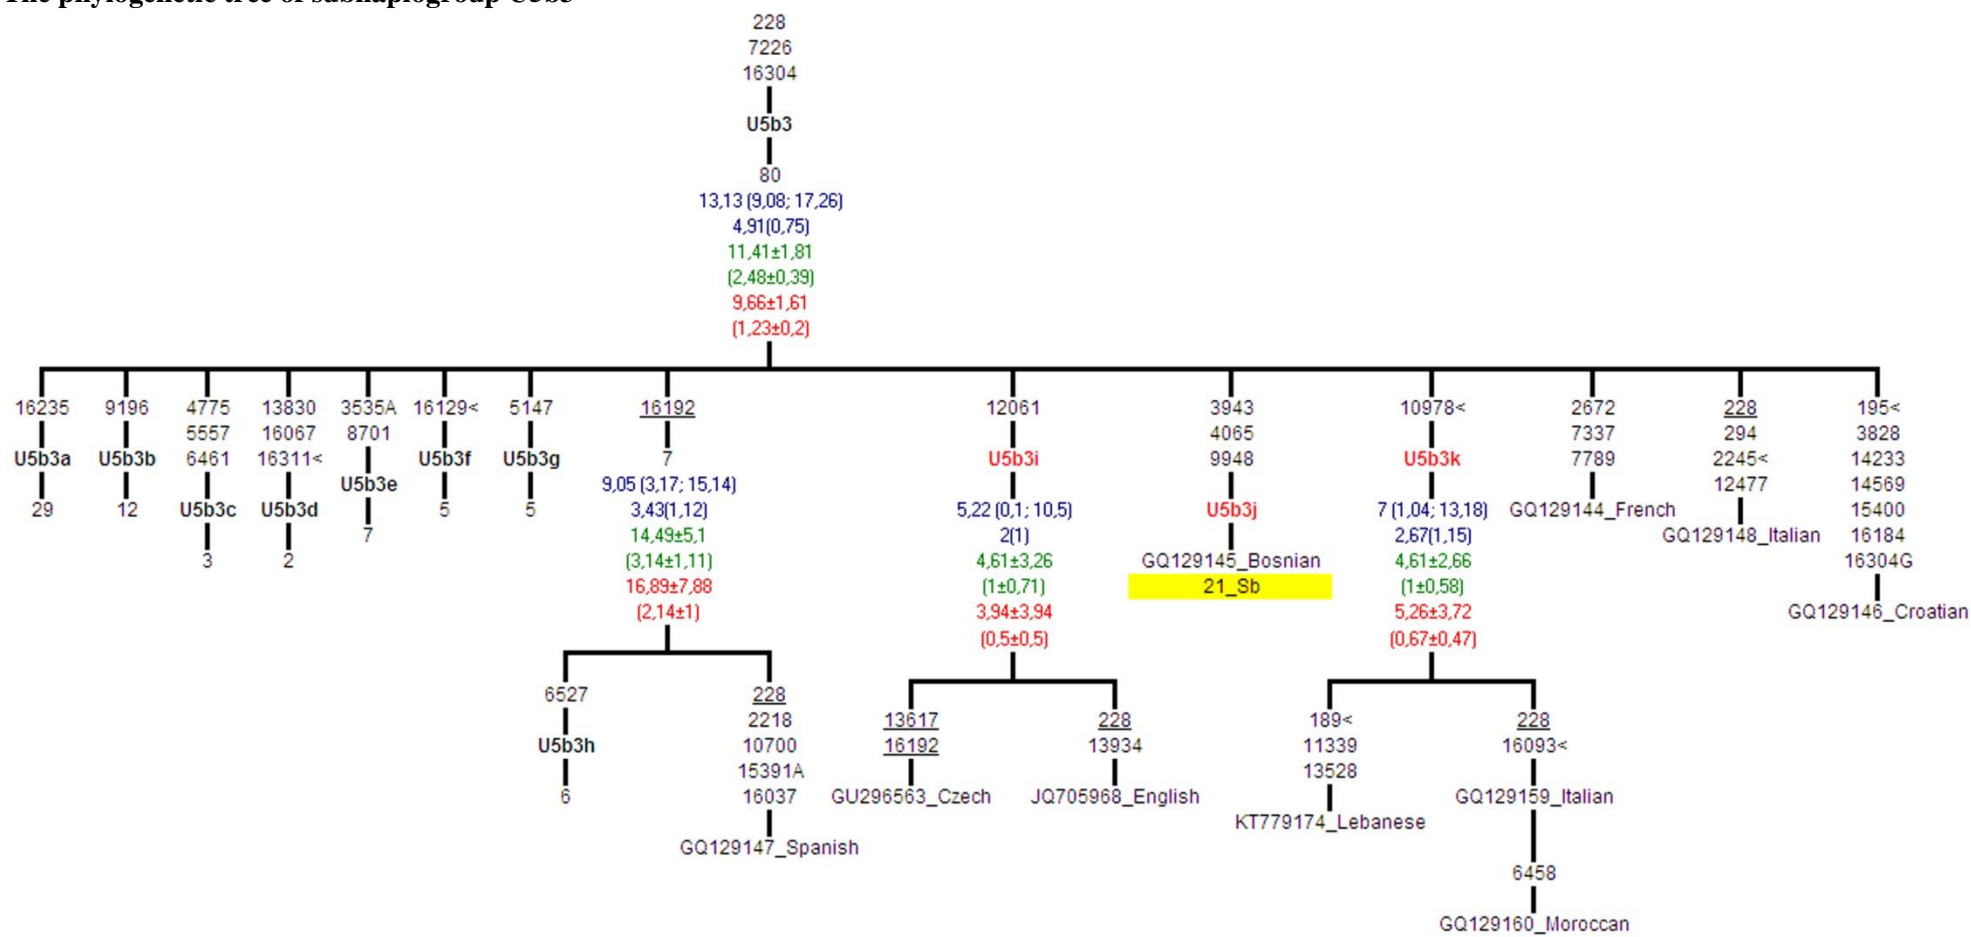

The phylogenetic tree of subhaplogroup U7b

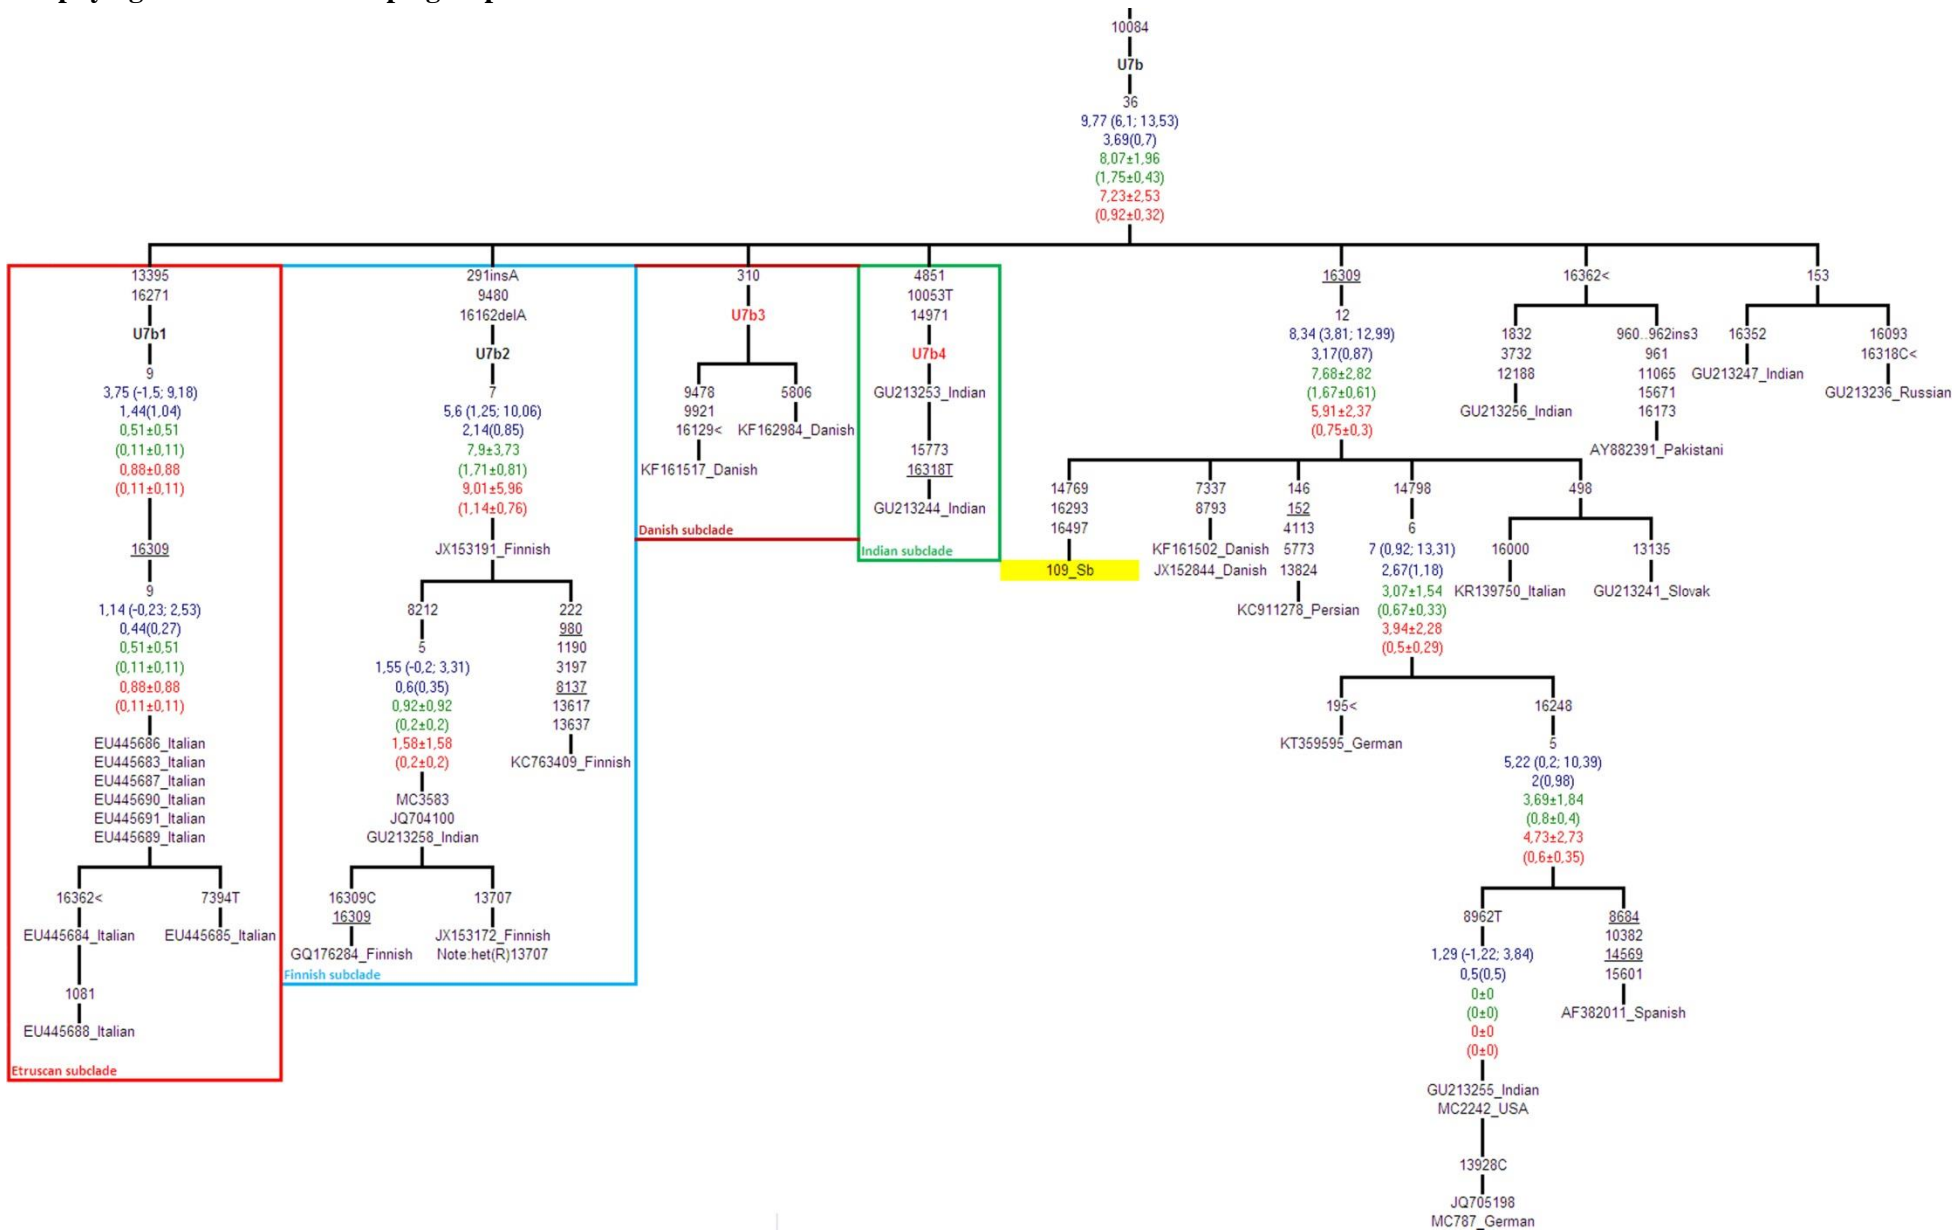

The phylogenetic tree of subhaplogroup U8a1a1a

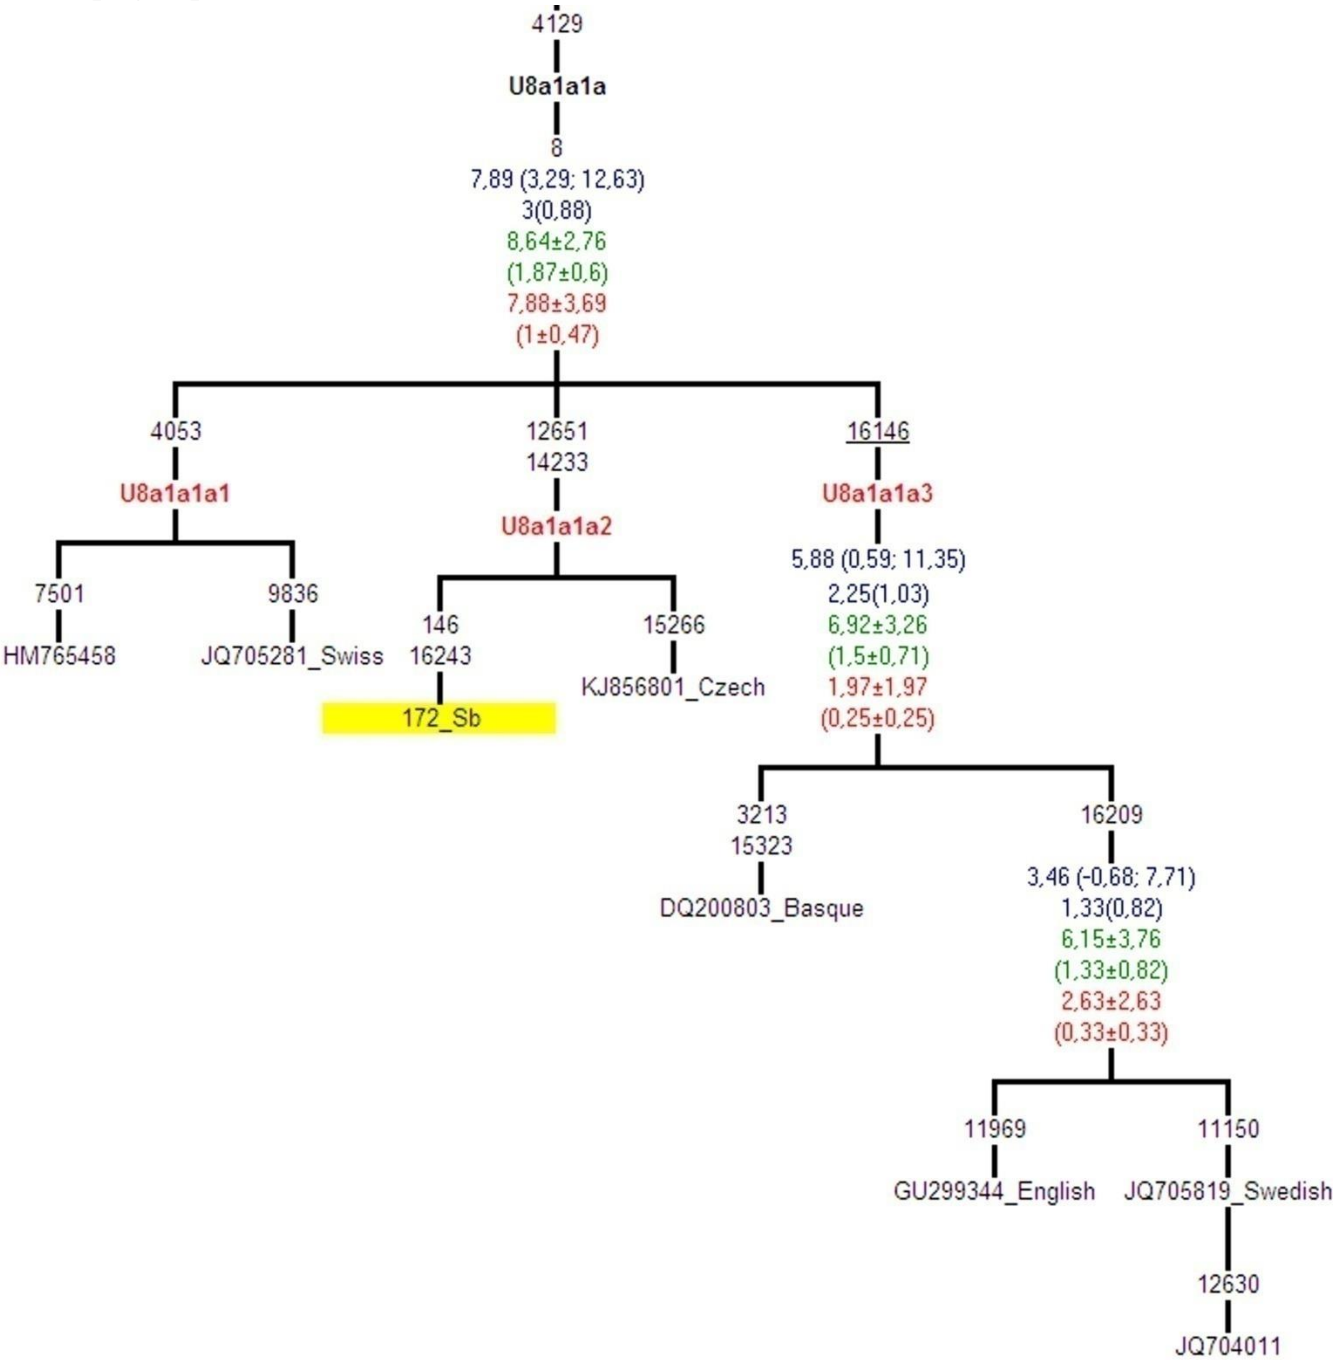

Supplement: Supplementary file 4 [file 1]
