# Supplementary material
Source: publisher figshare collection journal article supplement (https://tandf.figshare.com/articles/dataset/_/4738054)
Supplement: Supplementary file 1 [file 1]

**Table S1.** mtDNA super-haplogroup U frequencies of European populations

| POPULATION                                                                     | HAPLOGROUP |      |      |      |      |       |      |      |      |       | Number of samples |
|--------------------------------------------------------------------------------|------------|------|------|------|------|-------|------|------|------|-------|-------------------|
|                                                                                | U*         | U1   | U2   | U3   | U4   | U5    | U6   | U7   | U8   | K     | N                 |
| ALBANIAN <sup>9, 48, 54</sup>                                                  | 0.00       | 0.96 | 0.00 | 0.96 | 4.81 | 5.77  | 0.00 | 0.00 | 0.00 | 4.33  | 208               |
| AUSTRIAN <sup>15, 83</sup>                                                     | 0.80       | 0.80 | 1.88 | 1.07 | 4.56 | 8.85  | 0.00 | 0.00 | 0.27 | 8.04  | 373               |
| BASQUE <sup>3, 8, 11, 19, 23, 35, 92, 97</sup>                                 | 0.25       | 0.00 | 0.68 | 0.17 | 0.85 | 15.35 | 0.25 | 0.08 | 0.59 | 4.33  | 1179              |
| BELARUSIAN <sup>10, 55</sup>                                                   | 4.46       | 0.28 | 1.11 | 1.67 | 2.79 | 11.14 | 0.00 | 0.28 | 0.00 | 3.34  | 359               |
| BOSNIAN & HERZEGOVINIAN <sup>39, 54, 67, 102</sup>                             | 0.00       | 0.66 | 1.33 | 0.53 | 5.19 | 7.18  | 0.13 | 0.66 | 0.27 | 6.12  | 752               |
| BULGARIAN <sup>18, 49, 97</sup>                                                | 0.20       | 1.31 | 1.20 | 2.11 | 3.82 | 7.03  | 0.00 | 0.70 | 0.40 | 5.92  | 996               |
| CZECH <sup>70, 75, 97, 110, 112</sup>                                          | 4.46       | 0.00 | 0.68 | 1.08 | 1.49 | 9.05  | 0.00 | 0.27 | 0.41 | 4.05  | 740               |
| DANISH <sup>61, 76, 96, 97</sup>                                               | 0.00       | 0.04 | 1.83 | 0.89 | 2.81 | 7.93  | 0.09 | 0.13 | 0.40 | 7.53  | 2244              |
| ENGLISH <sup>35, 41, 88, 96, 97</sup>                                          | 0.00       | 0.00 | 0.58 | 0.88 | 2.05 | 7.02  | 0.00 | 0.00 | 0.29 | 6.14  | 342               |
| ESTONIAN <sup>57, 97, 99, 100</sup>                                            | 1.13       | 0.00 | 1.13 | 0.75 | 5.26 | 13.53 | 0.00 | 0.00 | 0.00 | 1.88  | 266               |
| FINNISH <sup>40, 51, 56, 72, 96, 99</sup>                                      | 1.40       | 0.13 | 0.51 | 0.00 | 1.14 | 21.57 | 0.00 | 0.38 | 0.38 | 4.06  | 788               |
| FRENCH <sup>8, 30, 35, 95, 97, 98</sup>                                        | 0.29       | 0.07 | 1.51 | 1.00 | 2.44 | 9.39  | 0.22 | 0.07 | 0.72 | 8.96  | 1395              |
| GREEK <sup>13, 47, 53, 97</sup>                                                | 0.38       | 1.72 | 0.76 | 2.87 | 3.44 | 4.97  | 0.38 | 0.38 | 0.00 | 4.97  | 523               |
| CROATIAN <sup>7, 39, 54, 102</sup>                                             | 0.00       | 1.15 | 2.30 | 1.48 | 2.46 | 8.87  | 0.16 | 0.33 | 0.33 | 5.09  | 609               |
| IRISH <sup>71, 97</sup>                                                        | 0.33       | 0.00 | 1.33 | 1.00 | 1.33 | 8.33  | 0.00 | 0.00 | 0.00 | 12.00 | 301               |
| ICELANDIC <sup>42, 96, 99</sup>                                                | 0.00       | 0.00 | 0.00 | 2.24 | 2.46 | 7.61  | 0.00 | 0.00 | 0.00 | 7.16  | 447               |
| ITALIAN <sup>2, 7, 12, 17, 21, 32, 33, 36, 74, 77, 81, 97, 104, 105, 109</sup> | 0.11       | 1.04 | 1.71 | 2.45 | 1.71 | 5.99  | 0.45 | 0.59 | 0.33 | 6.99  | 2690              |
| CORSICAN <sup>32, 97, 111</sup>                                                | 0.00       | 0.00 | 0.82 | 0.00 | 0.82 | 5.74  | 0.00 | 0.00 | 1.64 | 8.20  | 122               |
| LATVIAN <sup>57, 90</sup>                                                      | 0.97       | 0.00 | 3.63 | 2.18 | 9.20 | 10.17 | 0.00 | 0.00 | 0.00 | 2.42  | 413               |
| LITHUANIAN <sup>50, 57</sup>                                                   | 1.17       | 0.00 | 0.00 | 1.17 | 3.79 | 10.79 | 0.00 | 0.00 | 0.58 | 1.75  | 343               |
| HUNGARIAN <sup>46, 108</sup>                                                   | 1.28       | 0.32 | 0.96 | 0.64 | 3.21 | 7.05  | 0.64 | 0.32 | 0.32 | 5.77  | 312               |

|                                                                                 |      |      |      |      |      |       |      |      |      |      |       |
|---------------------------------------------------------------------------------|------|------|------|------|------|-------|------|------|------|------|-------|
| MACEDONIAN <sup>13, 25, 54, 115</sup>                                           | 1.23 | 1.23 | 1.98 | 1.23 | 3.21 | 7.65  | 0.00 | 0.00 | 0.00 | 4.69 | 405   |
| GERMAN <sup>6, 14, 31, 35, 45, 62, 87, 91, 96, 97, 106</sup>                    | 0.50 | 0.29 | 0.71 | 1.43 | 3.07 | 8.21  | 0.00 | 0.14 | 0.29 | 6.07 | 1401  |
| NORWEGIAN <sup>41, 79, 84, 97</sup>                                             | 0.32 | 0.16 | 0.00 | 1.27 | 2.70 | 11.76 | 0.00 | 0.00 | 0.32 | 5.72 | 629   |
| POLISH <sup>38, 68, 75, 97</sup>                                                | 0.08 | 0.47 | 1.09 | 0.93 | 4.81 | 11.09 | 0.00 | 0.16 | 0.78 | 3.95 | 1290  |
| PORTUGUESE <sup>16, 23, 37, 64, 85, 86, 92, 96</sup>                            | 0.68 | 0.00 | 1.37 | 0.93 | 1.55 | 6.96  | 1.99 | 0.06 | 0.00 | 5.53 | 1610  |
| ROMANIAN <sup>13, 44, 97</sup>                                                  | 0.92 | 0.00 | 0.92 | 0.92 | 3.69 | 8.00  | 0.00 | 0.00 | 0.31 | 5.54 | 325   |
| RUSSIAN <sup>10, 38, 52, 65, 66, 68, 78, 80, 97</sup>                           | 0.70 | 0.38 | 1.08 | 0.76 | 4.19 | 10.48 | 0.06 | 0.25 | 0.83 | 4.19 | 1575  |
| SARDINIAN <sup>28, 32, 34, 97</sup>                                             | 0.00 | 2.79 | 0.00 | 1.40 | 0.47 | 8.60  | 1.40 | 0.00 | 0.00 | 5.81 | 430   |
| SLOVAK <sup>59, 69</sup>                                                        | 0.34 | 0.52 | 0.86 | 0.86 | 5.51 | 10.84 | 0.00 | 0.17 | 0.52 | 3.79 | 581   |
| SLOVENIAN <sup>67, 102, 116, 117</sup>                                          | 0.00 | 1.10 | 2.61 | 1.92 | 2.88 | 10.16 | 0.14 | 0.00 | 0.27 | 5.91 | 728   |
| SICILIAN <sup>17, 81, 97, 113</sup>                                             | 0.00 | 1.07 | 0.54 | 1.61 | 0.80 | 3.49  | 0.54 | 1.07 | 0.27 | 7.51 | 373   |
| SERBIAN <sup>1, 25, 26, 39, 54, 114</sup>                                       | 0.45 | 0.45 | 1.58 | 0.90 | 6.11 | 6.79  | 0.00 | 0.68 | 0.45 | 5.43 | 442   |
| SCOTISH <sup>41</sup>                                                           | 0.00 | 0.33 | 0.67 | 1.50 | 1.92 | 7.33  | 0.00 | 0.08 | 0.25 | 8.75 | 1200  |
| SPANISH <sup>4, 5, 8, 20, 23, 24, 32, 35, 37, 43, 58, 63, 82, 89, 92, 101</sup> | 0.58 | 0.10 | 0.97 | 1.10 | 1.79 | 8.64  | 1.62 | 0.06 | 0.29 | 5.91 | 3080  |
| SWISS <sup>29, 94</sup>                                                         | 0.00 | 0.00 | 0.88 | 0.88 | 3.07 | 7.02  | 0.00 | 0.00 | 0.00 | 5.26 | 228   |
| SWEDISH <sup>51, 57, 60, 100, 107</sup>                                         | 0.94 | 0.42 | 0.83 | 0.62 | 3.22 | 11.75 | 0.00 | 0.21 | 0.42 | 7.59 | 962   |
| TURKISH <sup>18, 22, 27, 48, 73, 96, 97, 103</sup>                              | 0.72 | 2.71 | 1.26 | 3.43 | 2.89 | 4.87  | 0.00 | 0.36 | 0.54 | 5.23 | 554   |
| UKRAINIAN <sup>66, 75, 93</sup>                                                 | 0.00 | 0.00 | 1.53 | 1.02 | 5.61 | 10.46 | 0.00 | 0.00 | 0.26 | 4.97 | 784   |
| WELSH <sup>96</sup>                                                             | 0.00 | 0.00 | 0.00 | 0.00 | 0.00 | 4.35  | 0.00 | 0.00 | 0.00 | 7.61 | 92    |
| VLACH <sup>13</sup>                                                             | 0.00 | 1.14 | 0.00 | 1.71 | 2.29 | 10.86 | 0.00 | 0.00 | 0.00 | 5.71 | 175   |
|                                                                                 |      |      |      |      |      |       |      |      |      |      | 32266 |

## References:

1. This study ( SRB= 33) – mtDNA haplogroup affiliation was assessed based on the coding region markers and control region sequencing as described in Davidovic et al. (2015).

2. Achilli A, Olivieri A, Pala M, Metspalu E, Fornarino S, Battaglia V, Accetturo M, Kutuev I, Khusnutdinova E, Pennarun E et al. 2007. Mitochondrial DNA variation of modern Tuscans supports the near eastern origin of Etruscans. *Am J Hum Genet* 80(4):759-768. (ITA=322)
3. Alfonso-Sanchez MA, Cardoso S, Martinez-Bouzas C, Pena JA, Herrera RJ, Castro A, Fernandez-Fernandez I, De Pancorbo MM. 2008. Mitochondrial DNA haplogroup diversity in Basques: A reassessment based on HVI and HVII polymorphisms. *Am J Hum Biol* 20(2):154-164. (BSQ=55)
4. Alvarez L, Santos C, Ramos A, Pratdesaba R, Francalacci P, Aluja MP. 2010. Mitochondrial DNA Patterns in the Iberian Northern Plateau: Population Dynamics and Substructure of the Zamora Province. *Am J Phys Anthropol* 142(4):531-539. (SPA=214)
5. Alvarez-Iglesias V, Mosquera-Miguel A, Cerezo M, Quintans B, Zarrabeitia MT, Cusco I, Lareu MV, Garcia O, Perez-Jurado L, Carracedo A et al. 2009. New Population and Phylogenetic Features of the Internal Variation within Mitochondrial DNA Macro-Haplogroup R0. *Plos ONE* 4(4): e5112. (SPA=518)
6. Baasner A, Schafer C, Junge A, Madea B. 1998. Polymorphic sites in human mitochondrial DNA control region sequences: population data and maternal inheritance. *Forensic Sci Int* 98(3):169-178. (GER=50)
7. Babalini C, Martinez-Labarga C, Tolk HV, Kivisild T, Giampaolo R, Tarsi T, Contini I, Barac L, Janicijevic B, Klaric IM et al. 2005. The population history of the Croatian linguistic minority of Molise (southern Italy): a maternal view. *Eur J Hum Genet* 13(8):902-912. (CRO=41, ITA=199)
8. Behar DM, Harmant C, Manry J, van Oven M, Haak W, Martinez-Cruz B, Salaberria J, Oyharzabal B, Bauduer F, Comas D et al. 2012. The Basque Paradigm: Genetic Evidence of a Maternal Continuity in the Franco-Cantabrian Region since Pre-Neolithic Times. *Am J Hum Genet* 90(3):486-493. (BSQ=599, FRA=160, SPA=145)
9. Belledi M, Poloni ES, Casalotti R, Conterio F, Mikerezi I, Tagliavini J, Excoffier L. 2000. Maternal and paternal lineages in Albania and the genetic structure of Indo-European populations. *Eur J Hum Genet* 8(7):480-486. (ALB=42)
10. Belyaeva O, Bermisheva M, Khrunin A, Slominsky P, Bebyakova N, Khusnutdinova E, Mikulich A, Limborska S. 2003. Mitochondrial DNA variations in Russian and Belorussian populations. *Hum Biol* 75(5):647-660. (RUS=159, BEL=92)
11. Bertranpetit J, Sala J, Calafell F, Underhill PA, Moral P, Comas D. 1995. Human mitochondrial DNA variation and the origin of Basques. *Ann Hum Genet* 59(Pt 1):63-81. (BSQ=45)
12. Bini C, Ceccardi S, Luiselli D, Ferri G, Pelotti S, Colalongo C, Falconi M, Pappalardo G. 2003. Different informativeness of the three hypervariable mitochondrial DNA regions in the population of Bologna (Italy). *Forensic Sci Int* 135(1):48-52. (ITA=100)

13. Bosch E, Calafell F, Gonzalez-Neira A, Flaiz C, Mateu E, Scheil HG, Huckenbeck W, Efremovska L, Mikerezi I, Xirotiris N et al. 2006. Paternal and maternal lineages in the Balkans show a homogeneous landscape over linguistic barriers, except for the isolated Aromuns. *Ann Hum Genet* 70:459-487. (GRE=25, MAC=37, ROM=105, VLA=175)
14. Brandstatter A, Klein R, Duftner N, Wiegand P, Parson W. 2006. Application of a quasi-median network analysis for the visualization of character conflicts to a population sample of mitochondrial DNA control region sequences from southern Germany (Ulm). *Int J Legal Med* 120(5):310-314. (GER=100)
15. Brandstatter A, Niederstatter H, Pavlic M, Grubwieser P, Parson W. 2007. Generating population data for the EMPOP database- An overview of the mtDNA sequencing and data evaluation processes considering 273 Austrian control region sequences as example. *Forensic Sci Int* 166(2-3):164-175. (AUS=273)
16. Brehm A, Pereira L, Kivisild T, Amorim A. 2003. Mitochondrial portraits of the Madeira and Acores archipelagos witness different genetic pools of its settlers. *Hum Genet* 114(1):77-86. (POR=333)
17. Brisighelli F, Alvarez-Iglesias V, Fondevila M, Blanco-Verea A, Carracedo A, Pascali VL, Capelli C, Salas A. 2012. Uniparental Markers of Contemporary Italian Population Reveals Details on Its Pre-Roman Heritage. *Plos ONE* 7(12): e50794. (ITA=502, SIC=80)
18. Calafell F, Underhill P, Tolun A, Angelicheva D, Kalaydjieva L. 1996. From Asia to Europe: Mitochondrial DNA sequence variability in Bulgarians and Turks. *Ann Hum Genet* 60:35-49. (BUG=30, TUR=29)
19. Cardoso S, Alfonso-Sanchez MA, Valverde L, Odriozola A, Perez-Miranda AM, Pena JA, de Pancorbo MM. 2011. The Maternal Legacy of Basques in Northern Navarre: New Insights Into the Mitochondrial DNA Diversity of the Franco-Cantabrian Area. *Am J Phys Anthropol* 145(3):480-488. (BSQ=110)
20. Cardoso S, Zarrabeitia MT, Valverde L, Odriozola A, Alfonso-Sanchez MA, de Pancorbo MM. 2010. Variability of the Entire Mitochondrial DNA Control Region in a Human Isolate from the Pas Valley (Northern Spain). *J Forensic Sci* 55(5):1196-1201. (SPA=61)
21. Coia V, Boschi I, Trombetta F, Cavulli F, Montinaro F, Destro-Bisol G, Grimaldi S, Pedrotti A. 2012. Evidence of high genetic variation among linguistically diverse populations on a micro-geographic scale: a case study of the Italian Alps. *J Hum Genet* 57(4):254-260. (ITA=392)
22. Comas D, Calafell F, Mateu E, PerezLezaun A, Bertranpetit J. 1996. Geographic variation in human mitochondrial DNA control region sequence: The population history of Turkey and its relationship to the European populations. *Mol Biol Evol* 13(8):1067-1077. (TUR=45)
23. CorteReal HBSM, Macaulay VA, Richards MB, Hariti G, Issad MS, CambonThomsen A, Papiha S, Bertranpetit J, Sykes BC. 1996. Genetic diversity in the Iberian Peninsula determined from mitochondrial sequence analysis. *Ann Hum Genet* 60:331-350. (BSQ=61, POR=54, SPA=71)

24. Crespillo M, Luque JA, Paredes M, Fernandez R, Ramirez E, Valverde JL. 2000. Mitochondrial DNA sequences for 118 individuals from northeastern Spain. *Int J Legal Med* 114(1-2):130-132. (SPA=118)
25. Cvjetan S, Tolk HV, Lauc LB, Colak I, Dordevic D, Efremovska L, Janicijevic B, Kvesic A, Klaric IM, Metspalu E et al. 2004. Frequencies of mtDNA haplogroups in southeastern Europe - Croatians, Bosnians and Herzegovinians, Serbians, Macedonians and Macedonian Romani. *Collegium Antropol* 28(1):193-198. (MAC=146, SRB=117)
26. Davidovic S, Malyarchuk B, Aleksic JM, Derenko M, Topalovic V, Litvinov A, Stevanovic M, Kovacevic-Grujicic N. 2015. Mitochondrial DNA perspective of Serbian genetic diversity. *Am J Phys Anthropol* 156(3):449-465. (SRB=139)
27. Di Benedetto G, Erguven A, Stenico M, Castri L, Bertorelle G, Togan I, Barbujani G. 2001. DNA diversity and population admixture in Anatolia. *Am J Phys Anthropol* 115(2):144-156. (TUR=72)
28. Di Rienzo A, Wilson AC. 1991. Branching pattern in the evolutionary tree for human mitochondrial DNA. *Proc Natl Acad Sci USA* 88(5):1597-1601. (SAR=87)
29. Dimo-Simonin N, Grange F, Taroni F, Brandt-Casadevall C, Mangin P. 2000. Forensic evaluation of mtDNA in a population from south west Switzerland. *Int J Legal Med* 113(2):89-97. (SWI=154)
30. Dubut V, Chollet L, Murail P, Cartault F, Beraud-Colomb E, Serre M, Mogentale-Profizi N. 2004. mtDNA polymorphisms in five French groups: importance of regional sampling. *Eur J Hum Genet* 12(4):293-300. (FRA=210)
31. Eduardoff M, Huber G, Bayer B, Schmid D, Anslinger K, Gobel T, Zimmermann B, Schneider PM, Rock AW, Parson W. 2013. Mass spectrometric base composition profiling: Implications for forensic mtDNA databasing. *Forensic Sci Int-Gen* 7(6):587-592. (GER=199)
32. Falchi A, Giovannoni L, Calo CM, Piras IS, Moral P, Paoli G, Vona G, Varesi L. 2006. Genetic history of some western Mediterranean human isolates through mtDNA HVR1 polymorphisms. *J Hum Genet* 51(1):9-14. (ITA=61, COR=53, SAR=234, SPA=66)
33. Francalacci P, Bertranpetit J, Calafell F, Underhill PA. 1996. Sequence diversity of the control region of mitochondrial DNA in tuscany and its implications for the peopling of Europe. *Am J Phys Anthropol* 100(4):443-460. (ITA=49)
34. Fraumene C, Belle EMS, Castri L, Sanna S, Mancosu G, Cosso M, Marras F, Barbujani G, Pirastu M, Angius A. 2006. High resolution analysis and phylogenetic network construction using complete mtDNA sequences in Sardinian genetic isolates. *Mol Biol Evol* 23(11):2101-2111. (SAR=63)
35. Garcia O, Fregel R, Larruga JM, Alvarez V, Yurrebaso I, Cabrera VM, Gonzalez AM. 2011. Using mitochondrial DNA to test the hypothesis of a European post-glacial human recolonization from the Franco-Cantabrian refuge. *Heredity* 106(1):37-45. (BSQ=230, ENG=9, FRA=33, GER=11, SPA=131)

36. Gomez-Carballa A, Pardo-Seco J, Amigo J, Martinon-Torres F, Salas A. 2015. Mitogenomes from The 1000 Genome Project reveal new Near Eastern features in present-day Tuscans. *Plos ONE* 10(3):e0119242. (ITA=110)
37. Gonzalez AM, Brehm A, Perez JA, Maca-Meyer N, Flores C, Cabrera VM. 2003. Mitochondrial DNA affinities at the Atlantic fringe of Europe. *Am J Phys Anthropol* 120(4):391-404. (POR=299, SPA=43)
38. Grzybowski T, Malyarchuk BA, Derenko MV, Perkova MA, Bednarek J, Wozniak M. 2007. Complex interactions of the Eastern and Western Slavic populations with other European groups as revealed by mitochondrial DNA analysis. *Forensic Sci Int-Gen* 1(2):141-147. (POL=413, RUS=157)
39. Harvey et al., NCBI GenBank. (B&H=165, CRO=61, SRB=55)
40. Hedman M, Brandstatter A, Pimenoff V, Sistonen P, Palo JU, Parson W, Sajantila A. 2007. Finnish mitochondrial DNA HVS-I and HVS-II population data. *Forensic Sci Int* 172(2-3):171-178. (FIN=200)
41. Helgason A, Hickey E, Goodacre S, Bosnes V, Stefansson K, Ward R, Sykes B. 2001. mtDNA and the islands of the north atlantic: Estimating the proportions of Norse and Gaelic ancestry. *Am J Hum Genet* 68(3):723-737. (ENG=141, NOR=323, SCO=1200)
42. Helgason A, Siguroardottir S, Gulcher JR, Ward R, Stefansson K. 2000. mtDNA and the origin of the Icelanders: Deciphering signals of recent population history. *Am J Hum Genet* 66(3):999-1016. (ICE=394)
43. Hernandez CL, Reales G, Dugoujon JM, Novelletto A, Rodriguez JN, Cuesta P, Calderon R. 2014. Human maternal heritage in Andalusia (Spain): its composition reveals high internal complexity and distinctive influences of mtDNA haplogroups U6 and L in the western and eastern side of region. *BMC Genet* 15:11. (SPA=279)
44. Hervella M, Izagirre N, Alonso S, Ioana M, Netea MG, de-la-Rua C. 2014. The Carpathian range represents a weak genetic barrier in South-East Europe. *BMC Genet* 15:56. (ROM=128)
45. Hofmann S, Jaksch M, Bezold R, Mertens S, Aholt S, Paprotta A, Gerbitz KD. 1997. Population genetics and disease susceptibility: characterization of central European haplogroups by mtDNA gene mutations, correlation with D loop variants and association with disease. *Hum Mol Genet* 6(11):1835-1846. (GER=67)
46. Irwin J, Egyed B, Saunier J, Szamosi G, O'Callaghan J, Padar Z, Parsons TJ. 2007. Hungarian mtDNA population databases from Budapest and the Baranya county Roma. *Int J Legal Med* 121(5):377-383. (HUN=211)
47. Irwin J, Saunier J, Strouss K, Paintner C, Diegoli T, Sturk K, Kovatsi L, Brandstatter A, Cariolou MA, Parson W et al. 2008. Mitochondrial control region sequences from northern Greece and Greek Cypriots. *Int J Legal Med* 122(1):87-89. (GRE=319)

48. Jankova-Ajanovska R, Zimmermann B, Huber G, Rock AW, Bodner M, Jakovski Z, Janeska B, Duma A, Parson W. 2014. Mitochondrial DNA control region analysis of three ethnic groups in the Republic of Macedonia. *Forensic Sci Int Genet* 13:1-2. (ALB=148, TUR=150)
49. Karachanak S, Carossa V, Nesheva D, Olivieri A, Pala M, Kashani BH, Grugni V, Battaglia V, Achilli A, Yordanov Y et al. 2012. Bulgarians vs the other European populations: a mitochondrial DNA perspective. *Int J Legal Med* 126(4):497-503. (BUG=855)
50. Kasperaviciute D, Kucinskas V, Stoneking M. 2004. Y chromosome and mitochondrial DNA variation in Lithuanians. *Ann Hum Genet* 68:438-452. (LIT=180)
51. Kittles RA, Bergen AW, Urbanek M, Virkkunen M, Linnoila M, Goldman D, Long JC. 1999. Autosomal, mitochondrial, and Y chromosome DNA variation in Finland: Evidence for a male-specific bottleneck. *Am J Phys Anthropol* 108(4):381-399. (FIN=74, SWE=28)
52. Kornienko et al., 2001 NCBI GenBank (RUS=124)
53. Kouvatsi A, Karaskou N, Apostolidis A, Kirmizidis G. 2001. Mitochondrial DNA sequence variation in Greeks. *Hum Biol* 73(6):855-869. (GRE=54)
54. Kovacevic L, Tambets K, Ilumae AM, Kushniarevich A, Yunusbayev B, Solnik A, Bego T, Primorac D, Skaro V, Leskovac A et al. 2014. Standing at the Gateway to Europe - The Genetic Structure of Western Balkan Populations Based on Autosomal and Haploid Markers. *Plos ONE* 9(8): e105090. (B&H=74, MAC=22, SRB=21, CRO=19, ALB=18)
55. Kushniarevich A, Sivitskaya L, Danilenko N, Novogrodskii T, Tsybovsky I, Kiseleva A, Kotova S, Chaubey G, Metspalu E, Sahakyan H et al. 2013. Uniparental Genetic Heritage of Belarusians: Encounter of Rare Middle Eastern Matrilineages with a Central European Mitochondrial DNA Pool. *Plos ONE* 8(6): e66499. (BEL=267)
56. Lahermo P, Sajantila A, Sistonen P, Lukka M, Aula P, Peltonen L, Savontaus ML. 1996. The genetic relationship between the Finns and the Finnish Saami (Lapps): Analysis of nuclear DNA and mtDNA. *Am J Hum Genet* 58(6):1309-1322. (FIN=32)
57. Lappalainen T, Laitinen V, Salmela E, Andersen P, Huoponen K, Savontaus ML, Lahermo P. 2008. Migration waves to the Baltic Sea region. *Ann Hum Genet* 72:337-348. (EST=117, LAT=114, LIT=163, SWE=307)
58. Larruga JM, Diez F, Pinto FM, Flores C, Gonzalez AM. 2001. Mitochondrial DNA characterisation of European isolates: The Maragatos from Spain. *Eur J Hum Genet* 9(9):708-716. (SPA=160)
59. Lehocky I, Baldovic M, Kadasi L, Metspalu E. 2008. A database of mitochondrial DNA hypervariable regions I and II sequences of individuals from Slovakia. *Forensic Sci Int Genet* 2(4):e53-59. (SLK=374)
60. Lembring M, van Oven M, Montelius M, Allen M. 2013. Mitochondrial DNA analysis of Swedish population samples. *Int J Legal Med* 127(6):1097-1099. (SWE=299)

61. Li ST, Besenbacher S, Li YR, Kristiansen K, Grarup N, Albrechtsen A, Sparso T, Korneliussen T, Hansen T, Wang J et al. 2014. Variation and association to diabetes in 2000 full mtDNA sequences mined from an exome study in a Danish population. *Eur J Hum Genet* 22(8):1040-5. (DAN=2000)
62. Lutz S, Weisser HJ, Heizmann J, Pollak S. 1998. Location and frequency of polymorphic positions in the mtDNA control region of individuals from Germany (vol 111, pg 67, 1998). *Int J Legal Med* 111(5):286-286. (GER=200)
63. Maca-Meyer N, Sanchez-Velasco P, Flores C, Larruga JM, Gonzalez AM, Oterino A, Leyva-Cobian F. 2003. Y chromosome and mitochondrial DNA characterization of Pasiegos, a human isolate from Cantabria (Spain). *Ann Hum Genet* 67(Pt 4):329-339. (SPA=242)
64. Mairal Q, Santos C, Silva M, Marques SL, Ramos A, Aluja MP, Amorim A, Prata MJ, Alvarez L. 2013. Linguistic isolates in Portugal: Insights from the mitochondrial DNA pattern. *Forensic Sci Int-Gen* 7(6):618-623. (POR=121)
65. Malyarchuk B, Derenko M, Grzybowski T, Lunkina A, Czarny J, Rychkov S, Morozava I, Denisova G, Miscicka-Sliwka D. 2004. Differentiation of mitochondrial DNA and Y chromosomes in Russian populations. *Hum Biol* 76(6):877-900. (RUS=325)
66. Malyarchuk BA, Derenko MV. 2001. Mitochondrial DNA variability in Russians and Ukrainians: Implication to the origin of the Eastern Slavs. *Ann Hum Genet* 65:63-78. (RUS=50, UKR=18)
67. Malyarchuk BA, Grzybowski T, Derenko MV, Czarny J, Drobni K, Miscicka-Sliwka D. 2003. Mitochondrial DNA variability in Bosnians and Slovenians. *Ann Hum Genet* 67:412-425. (BIH=144, SLO=104)
68. Malyarchuk BA, Grzybowski T, Derenko MV, Czarny J, Wozniak M, Miscicka-Sliwka D. 2002. Mitochondrial DNA variability in Poles and Russians. *Ann Hum Genet* 66:261-283. (POL=436, RUS=201)
69. Malyarchuk BA, Perkova MA, Derenko MV, Vanecek T, Lazur J, Gomolcak P. 2008. Mitochondrial DNA variability in Slovaks, with application to the Roma origin. *Ann Hum Genet* 72(Pt 2):228-240. (SLK=207)
70. Malyarchuk BA, Vanecek T, Perkova MA, Derenko MV, Sip M. 2006. Mitochondrial DNA variability in the Czech population, with application to the ethnic history of slavs. *Hum Biol* 78(6):681-696. (CZE=179)
71. McEvoy B, Richards M, Forster P, Bradley DG. 2004. The Longue duree of genetic ancestry: Multiple genetic marker systems and Celtic origins on the Atlantic facade of Europe. *Am J Hum Genet* 75(4):693-702. (IRE=200)
72. Meinila M, Finnila S, Majamaa K. 2001. Evidence for mtDNA admixture between the Finns and the Saami. *Hum Hered* 52(3):160-170. (FIN=403)
73. Mergen H, Oner R, Oner C. 2004. Mitochondrial DNA sequence variation in the Anatolian peninsula (Turkey). *J Genet* 83(1):39-47. (TUR=75)



74. Messina F, Scorrano G, Labarga CM, Rolfo MF, Rickards O. 2010. Mitochondrial DNA variation in an isolated area of Central Italy. *Ann Hum Biol* 37(3):385-402. (ITA=124)
75. Mielnik-Sikorska M, Daca P, Malyarchuk B, Derenko M, Skonieczna K, Perkova M, Dobosz T, Grzybowski T. 2013. The History of Slavs Inferred from Complete Mitochondrial Genome Sequences. *Plos ONE* 8(1): e54360. (CZE=85, POL=404, UKR=159)
76. Mikkelsen M, Sorensen E, Rasmussen EM, Morling N. 2010. Mitochondrial DNA HV1 and HV2 variation in Danes. *Forensic Sci Int-Gen* 4(4):E87-E88. (DAN=206)
77. Mogentale-Profizi N, Chollet L, Stevanovitch A, Dubut V, Poggi C, Pradie MP, Spadoni JL, Gilles A, Beraud-Colomb E. 2001. Mitochondrial DNA sequence diversity in two groups of Italian Veneto speakers from Veneto. *Ann Hum Genet* 65:153-166. (ITA=68)
78. Morozova I, Evsyukov A, Kon'kov A, Grosheva A, Zhukova O, Rychkov S. 2012. Russian ethnic history inferred from mitochondrial DNA diversity. *Am J Phys Anthropol* 147(3):341-351. (RUS=431)
79. Opdal SH, Rognum TO, Vege A, Stave AK, Dupuy BM, Egeland T. 1998. Increased number of substitutions in the D-loop of mitochondrial DNA in the sudden infant death syndrome. *Acta Paediatr* 87(10):1039-1044. (NOR=216)
80. Orekhov V, Poltoraus A, Zhivotovsky LA, Spitsyn V, Ivanov P, Yankovsky N. 1999. Mitochondrial DNA sequence diversity in Russians. *FEBS Lett* 445(1):197-201. (RUS=103)
81. Ottoni C, Martinez-Labarga C, Vitelli L, Scano G, Fabrini E, Contini I, Biondi G, Rickards O. 2009. Human mitochondrial DNA variation in Southern Italy. *Ann Hum Biol* 36(6):785-811. (ITA=187, SIC=154)
82. Pardinas AF, Roca A, Garcia-Vazquez E, Lopez B. 2012. Mitochondrial diversity patterns and the Magdalenian resettlement of Europe: new insights from the edge of the Franco-Cantabrian refuge. *J Hum Genet* 57(11):717-726. (SPA=429)
83. Parson W, Parsons TJ, Scheithauer R, Holland MM. 1998. Population data for 101 Austrian Caucasian mitochondrial DNA d-loop sequences: Application of mtDNA sequence analysis to a forensic case. *Int J Legal Med* 111(3):124-132. (AUS=100)
84. Passarino G, Cavalleri GL, Lin AA, Cavalli-Sforza LL, Borresen-Dale AL, Underhill PA. 2002. Different genetic components in the Norwegian population revealed by the analysis of mtDNA and Y chromosome polymorphisms. *Eur J Hum Genet* 10(9):521-529. (NOR=74)
85. Pereira L, Prata MJ, Amorim A. 2000. Diversity of mtDNA lineages in Portugal: not a genetic edge of European variation. *Ann Hum Genet* 64:491-506. (POR=241)
86. Pereira V, Gomes V, Amorim A, Gusmao L, Prata MJ. 2010. Genetic Characterization of Uniparental Lineages in Populations from Southwest Iberia with Past Malaria Endemicity. *Am J Hum Biol* 22(5):588-595. (POR=285)

87. Pfeiffer H, Brinkmann B, Huhne J, Rolf B, Morris AA, Steighner R, Holland MM, Forster P. 1999. Expanding the forensic German mitochondrial DNA control region database: genetic diversity as a function of sample size and microgeography. *Int J Legal Med* 112(5):291-298. (GER=100)
88. Piercy R, Sullivan KM, Benson N, Gill P. 1993. The application of mitochondrial DNA typing to the study of white Caucasian genetic identification. *Int J Legal Med* 106(2):85-90. (ENG=100)
89. Plaza S, Calafell F, Helal A, Bouzerna N, Lefranc G, Bertranpetit J, Comas D. 2003. Joining the pillars of hercules: mtDNA sequences show multidirectional gene flow in the western Mediterranean. *Ann Hum Genet* 67:312-328. (SPA=95)
90. Pliss L, Tambets K, Loogvali EL, Pronina N, Lazdins M, Krumina A, Baumanis V, Villems R. 2006. Mitochondrial DNA portrait of Latvians: Towards the understanding of the genetic structure of Baltic-speaking populations. *Ann Hum Genet* 70:439-458. (LAT=299)
91. Poetsch M, Wittig H, Krause D, Lignitz E. 2003. Mitochondrial diversity of a northeast German population sample. *Forensic Sci Int* 137(2-3):125-132. (GER=300)
92. Prieto L, Zimmermann B, Goios A, Rodriguez-Monge A, Paneto GG, Alves C, Alonso A, Fridman C, Cardoso S, Lima G et al. 2011. The GHEP-EMPOP collaboration on mtDNA population data-A new resource for forensic casework. *Forensic Sci Int-Gen* 5(2):146-151. (SPA=378, POR=240, BSQ=29)
93. Pshenichnov A, Balanovsky O, Utevska O, Metspalu E, Zaporozhchenko V, Agdzhoyan A, Churnosov M, Atramentova L, Balanovska E. 2013. Genetic Affinities of Ukrainians From the Maternal Perspective. *Am J Phys Anthropol* 152(4):543-550. (UKR=607)
94. Pult I, Sajantila A, Simanainen J, Georgiev O, Schaffner W, Paabo S. 1994. Mitochondrial DNA sequences from Switzerland reveal striking homogeneity of European populations. *Biol Chem Hoppe-Seyler* 375(12):837-840. (SWI=74)
95. Richard C, Pennarun E, Kivisild T, Tambets K, Tolk HV, Metspalu E, Reidla M, Chevalier S, Giraudet S, Lauc LB et al. 2007. An mtDNA perspective of French genetic variation. *Ann Hum Biol* 34(1):68-79. (FRA=868)
96. Richards M, CorteReal H, Forster P, Macaulay V, WilkinsonHerbots H, Demaine A, Papiha S, Hedges R, Bandelt HJ, Sykes B. 1996. Paleolithic and neolithic lineages in the European mitochondrial gene pool. *Am J Hum Genet* 59(1):185-203. (DAN=33, ENG=69, FIN=29, GER=156, ICE=14, POR=37, TUR=22, WEL=92)
97. Richards M, Macaulay V, Hickey E, Vega E, Sykes B, Guida V, Rengo C, Sellitto D, Cruciani F, Kivisild T et al. 2000. Tracing European founder lineages in the Near Eastern mtDNA pool. *Am J Hum Genet* 67(5):1251-1276. (BSQ=50, BUG=111, COR=23, CZE=83, DAN=5, ENG=23, EST=101, FRA=71, GER=5, GRE=125, ITA=48, IRE=101, NOR=16, POL=37, ROM=92, RUS=25, SAR=46, SIC=90, TUR=132)

98. Rousselet F, Mangin P. 1998. Mitochondrial DNA polymorphisms: A study of 50 French Caucasian individuals and application to forensic casework. *Int J Legal Med* 111(6):292-298. (FRA=50)
99. Sajantila A, Lahermo P, Anttinen T, Lukka M, Sistonen P, Savontaus ML, Aula P, Beckman L, Tranebjaerg L, Gedde-Dahl T et al. 1995. Genes and languages in Europe: an analysis of mitochondrial lineages. *Genome Res* 5(1):42-52. (EST=28, FIN=50, ICE=39)
100. Sajantila A, Salem AH, Savolainen P, Bauer K, Gierig C, Paabo S. 1996. Paternal and maternal DNA lineages reveal a bottleneck in the founding of the Finnish population. *Proc Natl Acad Sci USA* 93(21):12035-12039. (EST=20, SWE=32)
101. Salas A, Comas D, Lareu MV, Bertranpetit J, Carracedo A. 1998. MtDNA analysis of the Galician population: A genetic edge of European variation. *Eur J Hum Genet* 6(4):365-375. (SPA=92)
102. Sarac J, Saric T, Augustin DH, Jeran N, Kovacevic L, Cvjetan S, Lewis AP, Metspalu E, Reidla M, Novokmet N et al. 2014. Maternal Genetic Heritage of Southeastern Europe Reveals a New Croatian Isolate and a Novel, Local Sub-Branching in the X2 Haplogroup. *Ann Hum Genet* 78(3):178-194. (B&H=369, CRO=488, SLO=97)
103. Schonberg A, Theunert C, Li MK, Stoneking M, Nasidze I. 2011. High-throughput sequencing of complete human mtDNA genomes from the Caucasus and West Asia: high diversity and demographic inferences. *Eur J Hum Genet* 19(9):988-994. (TUR=29)
104. Stenico M, Nigro L, Bertorelle G, Calafell F, Capitanio M, Corrain C, Barbujani G. 1996. High mitochondrial sequence diversity in linguistic isolates of the Alps. *Am J Hum Genet* 59(6):1363-1375. (ITA=50)
105. Tagliabracci A, Turchi C, Buscemi L, Sassaroli C. 2001. Polymorphism of the mitochondrial DNA control region in Italians. *Int J Legal Med* 114(4-5):224-228. (ITA=83)
106. Tetzlaff S, Brandstater A, Wegener R, Parson W, Weirich V. 2007. Mitochondrial DNA population data of HVS-I and HVS-II sequences from a northeast German sample. *Forensic Sci Int* 172(2-3):218-224. (GER=213)
107. Tillmar AO, Coble MD, Wallerstrom T, Holmlund G. 2010. Homogeneity in mitochondrial DNA control region sequences in Swedish subpopulations. *Int J Legal Med* 124(2):91-98. (SWE=296)
108. Tomory G, Csanyi B, Bogacsi-Szabo E, Kalmar T, Czibula A, Csosz A, Priskin K, Mende B, Lango P, Downes CS et al. 2007. Comparison of maternal lineage and biogeographic analyses of ancient and modern Hungarian populations. *Am J Phys Anthropol* 134(3):354-368. (HUN=101)
109. Turchi C, Buscemi L, Previdere C, Grignani P, Brandstatter A, Achilli A, Parson W, Tagliabracci A, Group G. 2008. Italian mitochondrial DNA database: results of a collaborative exercise and proficiency testing. *Int J Legal Med* 122(3):199-204. (ITA=395)
110. Vanecek T, Vorel F, Sip M. 2004. Mitochondrial DNA D-loop hypervariable regions: Czech population data. *Int J Legal Med* 118(1):14-18. (CZE=93)

111. Varesi L, Memmi M, Cristofari MC, Mameli GE, Calo CM, Vona G. 2000. Mitochondrial control-region sequence variation in the Corsican population, France. *Am J Hum Biol* 12(3):339-351. (COR=46)
112. Vidrova V, Tesarova M, Trefilova E, Honzik T, Magner M, Zeman J. 2008. Mitochondrial DNA Haplogroups in the Czech Population Compared to Other European Countries. *Hum Biol* 80(6):669-674. (CZE=300)
113. Vona G, Ghiani ME, Calo CM, Vacca L, Memmi M, Varesi L. 2001. Mitochondrial DNA sequence analysis in Sicily. *Am J Hum Biol* 13(5):576-589. (SIC=49)
114. Zgonjanin D, Veselinovic I, Kubat M, Furac I, Antov M, Loncar E, Tasic M, Vukovic R, Omorjan R. 2010. Sequence polymorphism of the mitochondrial DNA control region in the population of Vojvodina Province, Serbia. *Legal Med* 12(2):104-107. (SRB=77)
115. Zimmermann B, Brandstatter A, Duftner N, Niederwieser D, Spiroski M, Arsov T, Parson W. 2007. Mitochondrial DNA control region population data from Macedonia. *Forensic Sci Int Genet* 1(3-4):e4-9. (MAC=200)
116. Zupanic Pajnic I, Balazic J, Komel R. 2004. Sequence polymorphism of the mitochondrial DNA control region in the Slovenian population. *Int J Legal Med* 118(1):1-4. (SLO=125)
117. Zupan A, Hauptman N, Glavac D. 2015. The maternal perspective for five Slovenian regions: The importance of regional sampling. *Ann Hum Biol*:1-10. (SLO=402)
