# Supplementary material
Source: publisher figshare collection journal article supplement (https://tandf.figshare.com/articles/dataset/_/4738054)
Supplement: Supplementary file 3 [file 1]

**Table S3.** List of the super-haplogroup U sequences used for phylogeny reconstruction

| Haplogroup |         | N  | Acc. No./<br>sequence ID | Population/<br>Archaeological site | Reference               |
|------------|---------|----|--------------------------|------------------------------------|-------------------------|
| K1a13      |         | 19 | KC878721                 | French                             | Costa et al., 2013.     |
|            |         |    | MC1519                   | French                             | mtDNA Community         |
|            |         |    | JQ702193                 | French                             | Behar et al., 2012.     |
|            |         |    | JQ703526                 | French                             | Behar et al., 2012.     |
|            |         |    | JQ702796                 | Spanish                            | Behar et al., 2012.     |
| K1a13a     |         | 14 |                          |                                    |                         |
|            | K1a13a1 | 7  | KM103655                 | Bosnian                            | Kovacevic et al., 2014. |
|            |         |    | KM103657                 | Croatian                           | Kovacevic et al., 2014. |
|            |         |    | KM103653                 | Croatian                           | Kovacevic et al., 2014. |
|            |         |    | KM103658                 | Croatian                           | Kovacevic et al., 2014. |
|            |         |    | JQ706030                 | Croatian                           | Behar et al., 2012.     |
|            |         |    | JN202723                 | Croatian                           | Family Tree DNA         |
|            |         |    | 39_Sb                    | Serbian                            | this study              |
|            | K1a13a2 | 2  | JQ704548                 | Spanish                            | Behar et al., 2012.     |
|            |         |    | MC3978                   | Spanish                            | mtDNA Community         |
|            | K1a13a3 | 2  | AY339564                 | Finnish                            | Moilanen et al., 2003.  |
|            |         |    | AY339563                 | Finnish                            | Moilanen et al., 2003.  |
|            | Ka13a4  | 3  | JQ702991                 | Irish                              | Behar et al., 2012.     |
|            |         |    | JQ705537                 | NA                                 | Behar et al., 2012.     |
|            |         |    | GU944475                 | USA                                | Family Tree DNA         |
| K1a2       |         | 46 | JN647926                 | Armenian                           | Family Tree DNA         |
|            |         |    | AY495254                 | European                           | Coble et al., 2004.     |
|            |         |    | HM065508                 | Italian                            | Family Tree DNA         |

|        |    |          |                  |                             |         |
|--------|----|----------|------------------|-----------------------------|---------|
| K1a2a  | 22 | EF660927 | Italian          | Gasparre et al., 2007.      | ancient |
|        |    | KF723708 | Italian          | Family Tree DNA             |         |
|        |    | MC3351   | Italian          | mtDNA Community             |         |
|        |    | JQ703309 | NA               | Behar et al., 2012.         |         |
|        |    | KC911410 | Qashqai          | Derenko et al., 2013.       |         |
|        |    | NN_20    | Russian          | this study                  |         |
|        |    | 80_Sb    | Serbian          | this study                  |         |
|        |    | KC878713 | Turkish          | Costa et al., 2013.         |         |
|        |    | KF161641 | Danish           | Li et al., 2014.            |         |
|        |    | JQ705620 | German           | Behar et al., 2012.         |         |
|        |    | EU915473 | Italian          | Pello et al., 2008.         |         |
|        |    | KT749777 | Italian          | Coia et al., 2016.          |         |
|        |    | EU849002 | NA               | Family Tree DNA             |         |
|        |    | JQ702031 | NA               | Behar et al., 2012.         |         |
|        |    | JQ705354 | NA               | Behar et al., 2012.         |         |
|        |    | JQ705646 | Polish           | Behar et al., 2012.         |         |
|        |    | JQ703026 | Scottish         | Behar et al., 2012.         |         |
|        |    | Troc4    | Els Trocs, Spain | Haak et al., 2015.          |         |
|        |    | JQ703041 | UK               | Behar et al., 2012.         |         |
|        |    | JQ705456 | UK               | Behar et al., 2012.         |         |
|        |    | MC1780   | USA              | mtDNA Community             |         |
| K1a2a1 | 5  | JQ701856 | NA               | Behar et al., 2012.         |         |
|        |    | MC3340   | NA               | mtDNA Community             |         |
|        |    | JQ702748 | Scottish         | Behar et al., 2012.         |         |
|        |    | NA20522  | Tuscan           | Gomez-Carbala et al., 2015. |         |
|        |    |          |                  |                             |         |
| K1a2a2 | 6  | MC2596   | Finnish          | mtDNA Community             |         |
|        |    | KF171123 | Finnish          | Family Tree DNA             |         |
|        |    | AY339565 | Finnish          | Moilanen et al., 2003.      |         |
|        |    | JQ703581 | NA               | Behar et al., 2012.         |         |
|        |    | MC723    | USA              | mtDNA Community             |         |

|       |     |          |                           |                       |         |
|-------|-----|----------|---------------------------|-----------------------|---------|
| K1a2b | 6   | EU760854 | English                   | Family Tree DNA       |         |
|       |     | HM041971 | French                    | Family Tree DNA       |         |
|       |     | MC3078   | German                    | mtDNA Community       |         |
|       |     | JQ704017 | NA                        | Behar et al., 2012.   |         |
|       |     | JQ706001 | NA                        | Behar et al., 2012.   |         |
|       |     | GQ281051 | NA                        | Family Tree DNA       |         |
|       |     |          |                           |                       |         |
| K1a2c | 7   | JQ705149 | Finnish                   | Behar et al., 2012.   | ancient |
|       |     | ROT3     | Rothenschirmbach, Germany | Haak et al., 2015.    |         |
|       |     | MC1359   | NA                        | mtDNA Community       |         |
|       |     | JQ703037 | NA                        | Behar et al., 2012.   |         |
|       |     | JQ702306 | NA                        | Behar et al., 2012.   |         |
|       |     | KC477768 | Swedish                   | Family Tree DNA       |         |
|       |     | MC3639   | USA                       | mtDNA Community       |         |
| K1a4  | 284 | KJ856742 | Altaian                   | Derenko et al., 2014. |         |
|       |     | KC911418 | Azeri                     | Derenko et al., 2013. |         |
|       |     | JX273272 | Chechen                   | Costa et al., 2013.   |         |
|       |     | Cz_III10 | Czech                     | this study            |         |
|       |     | AY495261 | European                  | Coble et al., 2004.   |         |
|       |     | AY495263 | European                  | Coble et al., 2004.   |         |
|       |     | EU130551 | Italian                   | Family Tree DNA       |         |
|       |     | JQ702505 | Italian                   | Behar et al., 2012.   |         |
|       |     | KT932091 | Italian                   | Family Tree DNA       |         |
|       |     | KT749800 | Italian                   | Coia et al., 2016.    |         |
|       |     | KT749812 | Italian                   | Coia et al., 2016.    |         |
|       |     | KT749811 | Italian                   | Coia et al., 2016.    |         |
|       |     | JQ703296 | NA                        | Behar et al., 2012.   |         |
|       |     | JX273285 | Romanian                  | Costa et al., 2013.   |         |
|       |     | JX273289 | Syrian                    | Costa et al., 2013.   |         |
|       |     | FJ348212 | Tirol                     | Pichler 2010.         |         |
|       |     | MC1072   | USA                       | mtDNA Community       |         |
|       |     | KM101805 | USA                       | Just et al., 2015.    |         |
|       |     |          |                           |                       |         |
|       |     |          |                           |                       |         |

K1a4a

184

|          |                    |                     |
|----------|--------------------|---------------------|
| JQ705100 | Ashkenazi          | Behar et al., 2012. |
| JQ702521 | German             | Behar et al., 2012. |
| JX273260 | Iraqi              | Costa et al., 2013. |
| JX273281 | Kabardian (Russia) | Costa et al., 2013. |
| JX273280 | Kabardian (Russia) | Costa et al., 2013. |
| EU603401 | NA                 | Family Tree DNA     |
| JX273253 | Palestinian        | Costa et al., 2013. |
| MC88     | Sicilian           | mtDNA Community     |
| JQ703493 | Swiss              | Behar et al., 2012. |
| KC878715 | Turkish            | Costa et al., 2013. |

K1a4a1

174

|          |                  |                     |
|----------|------------------|---------------------|
| KF162673 | Danish           | Li et al., 2014.    |
| AY495262 | European         | Coble et al., 2004. |
| JQ705229 | English          | Behar et al., 2012. |
| HM045846 | English          | Family Tree DNA     |
| JQ703704 | French           | Behar et al., 2012. |
| EU616625 | NA               | Family Tree DNA     |
| JQ704109 | NA               | Behar et al., 2012. |
| JQ705661 | NA               | Behar et al., 2012. |
| JQ701835 | NA               | Behar et al., 2012. |
| RISE154  | Poland (Unetice) | Allentoft 2015.     |
| JQ705785 | Portuguese       | Behar et al., 2012. |
| 57_Sb    | Serbian          | this study          |
| JQ705543 | Spanish          | Behar et al., 2012. |
| JQ702281 | Spanish          | Behar et al., 2012. |
| JQ704808 | Swedish          | Behar et al., 2012. |
| FJ460525 | Tunisian         | Costa et al., 2009. |
| JQ704320 | UK               | Behar et al., 2012. |
| KM101779 | USA              | Just et al., 2015.  |

ancient

K1a4a1a

84

|          |          |                     |
|----------|----------|---------------------|
| JQ705556 | Croatian | Behar et al., 2012. |
| JX153374 | Danish   | Raule et al., 2014. |
| JX152839 | Danish   | Raule et al., 2014. |

|          |         |                     |
|----------|---------|---------------------|
| JX152846 | Danish  | Raule et al., 2014. |
| JX153933 | Danish  | Raule et al., 2014. |
| KF161488 | Danish  | Li et al., 2014.    |
| KF161533 | Danish  | Li et al., 2014.    |
| KF161684 | Danish  | Li et al., 2014.    |
| KF161801 | Danish  | Li et al., 2014.    |
| KF161116 | Danish  | Li et al., 2014.    |
| KF162733 | Danish  | Li et al., 2014.    |
| KF161295 | Danish  | Li et al., 2014.    |
| KF161491 | Danish  | Li et al., 2014.    |
| KF161531 | Danish  | Li et al., 2014.    |
| KF162875 | Danish  | Li et al., 2014.    |
| JX153646 | Danish  | Raule et al., 2014. |
| KF161995 | Danish  | Li et al., 2014.    |
| KF161951 | Danish  | Li et al., 2014.    |
| KF162058 | Danish  | Li et al., 2014.    |
| KF162749 | Danish  | Li et al., 2014.    |
| JX153525 | Danish  | Raule et al., 2014. |
| JX153663 | Danish  | Raule et al., 2014. |
| KF161092 | Danish  | Li et al., 2014.    |
| KF162127 | Danish  | Li et al., 2014.    |
| KF161836 | Danish  | Li et al., 2014.    |
| KF161920 | Danish  | Li et al., 2014.    |
| KF162364 | Danish  | Li et al., 2014.    |
| JX153167 | Danish  | Raule et al., 2014. |
| KF161764 | Danish  | Li et al., 2014.    |
| JX047544 | English | Family Tree DNA     |
| JN089380 | English | Family Tree DNA     |
| HQ907958 | English | Family Tree DNA     |
| MC1418   | English | mtDNA Community     |
| JX153264 | Finnish | Raule et al., 2014. |
| JX153211 | Finnish | Raule et al., 2014. |
| JX153253 | Finnish | Raule et al., 2014. |
| KP752420 | Finnish | Family Tree DNA     |

|          |           |                          |
|----------|-----------|--------------------------|
| KR712273 | Finnish   | Family Tree DNA          |
| JX153257 | Finnish   | Raule et al., 2014.      |
| KF451073 | French    | Lippold et al., 2014.    |
| JQ703763 | French    | Behar et al., 2012.      |
| KF723707 | German    | Family Tree DNA          |
| JQ705714 | Hungarian | Behar et al., 2012.      |
| MC205    | Irish     | mtDNA Community          |
| JQ703782 | Irish     | Behar et al., 2012.      |
| KT749782 | Italian   | Coia et al., 2016.       |
| JQ702175 | NA        | Behar et al., 2012.      |
| AY495265 | NA        | Coble et al., 2004.      |
| JQ702213 | NA        | Behar et al., 2012.      |
| JQ702700 | NA        | Behar et al., 2012.      |
| JQ703007 | NA        | Behar et al., 2012.      |
| JQ702773 | NA        | Behar et al., 2012.      |
| JQ702811 | NA        | Behar et al., 2012.      |
| JN122621 | NA        | Family Tree DNA          |
| JQ704873 | NA        | Behar et al., 2012.      |
| JQ703444 | NA        | Behar et al., 2012.      |
| JQ705980 | NA        | Behar et al., 2012.      |
| JQ705270 | NA        | Behar et al., 2012.      |
| HM031133 | NA        | Family Tree DNA          |
| JQ703685 | NA        | Behar et al., 2012.      |
| EU328539 | NA        | Family Tree DNA          |
| MC1046   | NA        | mtDNA Community          |
| JQ702896 | NA        | Behar et al., 2012.      |
| KJ801422 | NA        | Lang et al., 2015.       |
| JQ701810 | NA        | Behar et al., 2012.      |
| JQ702238 | NA        | Behar et al., 2012.      |
| JQ703880 | NA        | Behar et al., 2012.      |
| JQ703168 | NA        | Behar et al., 2012.      |
| GU122978 | Russian   | Malyarchuk et al., 2010. |
| GU123015 | Russian   | Malyarchuk et al., 2010. |
| JQ340869 | Scottish  | Family Tree DNA          |

|         |    |          |          |                     |
|---------|----|----------|----------|---------------------|
| K1a4a1b | 13 | JN559854 | Swedish  | Family Tree DNA     |
|         |    | JQ702797 | Swedish  | Behar et al., 2012. |
|         |    | MC1232   | Swiss    | mtDNA Community     |
|         |    | JQ703212 | UK       | Behar et al., 2012. |
|         |    | KP718061 | USA      | Family Tree DNA     |
|         |    | KM101914 | USA      | Just et al., 2015.  |
|         |    | MC4884   | USA      | mtDNA Community     |
|         |    | GU361766 | USA      | Family Tree DNA     |
|         |    | KT700199 | USA      | Family Tree DNA     |
|         |    | KM101806 | USA      | Just et al., 2015.  |
|         |    | KM101905 | USA      | Just et al., 2015.  |
|         |    | GU371909 | USA      | Family Tree DNA     |
|         |    | MC1329   | USA      | mtDNA Community     |
| K1a4a1c | 7  | MC124    | Canadian | mtDNA Community     |
|         |    | MC2837   | English  | mtDNA Community     |
|         |    | GU191795 | English  | Family Tree DNA     |
|         |    | JQ702779 | English  | Behar et al., 2012. |
|         |    | JQ703407 | English  | Behar et al., 2012. |
|         |    | JQ703171 | German   | Behar et al., 2012. |
|         |    | EU677385 | NA       | Family Tree DNA     |
|         |    | GU971379 | NA       | Family Tree DNA     |
|         |    | JQ704948 | NA       | Behar et al., 2012. |
|         |    | JQ702471 | NA       | Behar et al., 2012. |
|         |    | EF464682 | NA       | Family Tree DNA     |
|         |    | JQ702610 | NA       | Behar et al., 2012. |
|         |    | MC1444   | USA      | mtDNA Community     |
|         |    | JF433953 | British  | Family Tree DNA     |
|         |    | JN258704 | English  | Family Tree DNA     |
|         |    | JX153840 | Finnish  | Raule et al., 2014. |
|         |    | MC821    | Finnish  | mtDNA Community     |
|         |    | JQ705215 | German   | Behar et al., 2012. |
|         |    | EU692798 | NA       | Family Tree DNA     |

|          |    |          |           |                        |
|----------|----|----------|-----------|------------------------|
| K1a4a1d  | 4  | KF703542 | USA       | Family Tree DNA        |
|          |    | AY495266 | European  | Coble et al., 2004.    |
|          |    | JQ705404 | German    | Behar et al., 2012.    |
|          |    | MC1892   | NA        | mtDNA Community        |
|          |    | JQ705558 | UK        | Behar et al., 2012.    |
| K1a4a1e  | 9  | EU597496 | Basque    | Hartmann et al., 2009. |
|          |    | KJ446001 | Basque    | Zheng et al., 2014.    |
|          |    | KF162102 | Danish    | Li et al., 2014.       |
|          |    | KF162742 | Danish    | Li et al., 2014.       |
|          |    | JQ704526 | Irish     | Behar et al., 2012.    |
|          |    | JQ705838 | Irish     | Behar et al., 2012.    |
|          |    | JQ705938 | NA        | Behar et al., 2012.    |
|          |    | HM103359 | NA        | Gomez-Duran 2010.      |
|          |    | JQ702341 | Norwegian | Behar et al., 2012.    |
| K1a4a1f  | 10 | HQ336048 | British   | Family Tree DNA        |
|          |    | JX127147 | English   | Family Tree DNA        |
|          |    | HQ843088 | English   | Family Tree DNA        |
|          |    | MC1001   | NA        | mtDNA Community        |
|          |    | JQ705816 | NA        | Behar et al., 2012.    |
|          |    | JQ703548 | NA        | Behar et al., 2012.    |
|          |    | JQ702302 | NA        | Behar et al., 2012.    |
|          |    | JQ702760 | NA        | Behar et al., 2012.    |
|          |    | KM101821 | USA       | Just et al., 2015.     |
|          |    | MC4090   | USA       | mtDNA Community        |
| Ka1a4a1g | 3  | JX048671 | Canadian  | Family Tree DNA        |
|          |    | JQ704759 | NA        | Behar et al., 2012.    |
|          |    | JQ703807 | NA        | Behar et al., 2012.    |
| K1a4a1h  | 4  | KF161479 | Danish    | Li et al., 2014.       |
|          |    | KF161570 | Danish    | Li et al., 2014.       |



|          |         |          |          |                     |                     |
|----------|---------|----------|----------|---------------------|---------------------|
| K1a4b    | K1a4a1i | 2        | JQ701994 | German              | Behar et al., 2012. |
|          |         |          | JN001930 | USA                 | Family Tree DNA     |
|          | K1a4a1j | 5        | KF417432 | English             | Family Tree DNA     |
|          |         |          | JQ702315 | NA                  | Behar et al., 2012. |
|          | K1a4a1k | 3        | JQ704770 | Polish              | Behar et al., 2012. |
|          |         |          | MC4185   | Spanish             | mtDNA Community     |
|          |         |          | JQ702744 | UK                  | Behar et al., 2012. |
|          |         |          | EU910091 | USA                 | Family Tree DNA     |
|          |         |          | JN086562 | USA                 | Family Tree DNA     |
|          | K1a4a1l | 3        | KF161586 | Danish              | Li et al., 2014.    |
|          |         |          | KT749781 | Italian             | Coia et al., 2016.  |
|          |         |          | KT749790 | Italian             | Coia et al., 2016.  |
|          | K1a4a1m | 3        | KT749779 | Italian             | Coia et al., 2016.  |
|          |         |          | KC878725 | Italian             | Costa et al., 2013. |
|          |         |          | MC1489   | Italian             | mtDNA Community     |
|          | K1a4a1n | 4        | Snb09    | Spanish             | Ramos et al., 2013. |
|          |         |          | Z144     | Spanish             | Ramos et al., 2013. |
|          |         |          | Z273     | Spanish             | Ramos et al., 2013. |
|          | K1a4a1o | 2        | JX273251 | Chuvash (Russia)    | Costa et al., 2013. |
|          |         |          | JX273275 | Chuvash (Russia)    | Costa et al., 2013. |
| JQ704092 |         |          | German   | Behar et al., 2012. |                     |
| JQ704727 |         |          | Irish    | Behar et al., 2012. |                     |
|          |         | JQ704078 | NA       | Behar et al., 2012. |                     |
|          |         | MC3711   | USA      | mtDNA Community     |                     |
|          |         | 11       |          |                     |                     |
|          |         |          | KT749814 | Italian             | Coia et al., 2016.  |
|          |         |          | EU675299 | NA                  | Family Tree DNA     |

|         |    |          |             |                             |
|---------|----|----------|-------------|-----------------------------|
| Ka1a4b1 | 8  | JX273287 | Syrian      | Costa et al., 2013.         |
|         |    | JN088539 | Armenian    | Family Tree DNA             |
|         |    | KF451142 | Beduin      | Lippold et al., 2014.       |
|         |    | EU600366 | Druze       | Shlush et al., 2008.        |
|         |    | KF451099 | Druze       | Lippold et al., 2014.       |
|         |    | KJ445988 | Druze       | Zheng et al., 2014.         |
|         |    | DQ301792 | NA          | Behar et al., 2006.         |
|         |    | JX273284 | Palestinian | Costa et al., 2013.         |
| K1a4c   | 9  | JX273257 | Romanian    | Costa et al., 2013.         |
|         |    | DQ301809 | NA          | Behar et al., 2006.         |
| K1a4c1  | 8  | HQ435872 | Armenian    | Family Tree DNA             |
|         |    | HQ538515 | Armenian    | Family Tree DNA             |
|         |    | JQ703523 | Italian     | Behar et al., 2012.         |
|         |    | JQ706020 | NA          | Behar et al., 2012.         |
|         |    | KC911519 | Persian     | Derenko et al., 2013.       |
|         |    | NA20530  | Tuscan      | Gomez-Carbala et al., 2015. |
|         |    | KM101939 | USA         | Just et al., 2015.          |
|         |    | KM101937 | USA         | Just et al., 2015.          |
| K1a4d   | 26 | Cz_V471  | Czech       | this study                  |
|         |    | KF163019 | Danish      | Li et al., 2014.            |
|         |    | KF162139 | Danish      | Li et al., 2014.            |
|         |    | KF162073 | Danish      | Li et al., 2014.            |
|         |    | JF710373 | Danish      | Family Tree DNA             |
|         |    | KF163021 | Danish      | Li et al., 2014.            |
|         |    | KF162022 | Danish      | Li et al., 2014.            |
|         |    | KF162714 | Danish      | Li et al., 2014.            |
|         |    | JQ703085 | English     | Behar et al., 2012.         |
|         |    | JQ705775 | English     | Behar et al., 2012.         |
|         |    | EU714298 | English     | Family Tree DNA             |
|         |    | AY495255 | European    | Coble et al., 2004.         |

|        |    |          |             |                             |
|--------|----|----------|-------------|-----------------------------|
|        |    | AY495253 | European    | Coble et al., 2004.         |
|        |    | AY495259 | European    | Coble et al., 2004.         |
|        |    | JQ701838 | French      | Behar et al., 2012.         |
|        |    | EU926621 | German      | Family Tree DNA             |
|        |    | JQ704760 | German      | Behar et al., 2012.         |
|        |    | JQ703048 | German      | Behar et al., 2012.         |
|        |    | JQ704963 | German      | Behar et al., 2012.         |
|        |    | JQ705629 | Irish       | Behar et al., 2012.         |
|        |    | JQ703034 | NA          | Behar et al., 2012.         |
|        |    | JQ702076 | NA          | Behar et al., 2012.         |
|        |    | HM565771 | NA          | Family Tree DNA             |
|        |    | 10_Sb    | Serbian     | this study                  |
|        |    | JQ703025 | Swiss       | Behar et al., 2012.         |
|        |    | KM101857 | USA         | Just et al., 2015.          |
| K1a4e  | 5  |          |             |                             |
|        |    | JQ704761 | NA          | Behar et al., 2012.         |
|        |    | JQ701973 | NA          | Behar et al., 2012.         |
|        |    | MC415    | NA          | mtDNA Community             |
|        |    | JX294315 | UK          | Family Tree DNA             |
|        |    | MC921    | USA         | mtDNA Community             |
| K1a4f  | 12 |          |             |                             |
|        |    | KF163000 | Danish      | Li et al., 2014.            |
|        |    | KC900995 | Greek       | Family Tree DNA             |
|        |    | JX273279 | Iraqi       | Costa et al., 2013.         |
|        |    | JX273277 | Iraqi       | Costa et al., 2013.         |
|        |    | GU722601 | NA          | Family Tree DNA             |
|        |    | KF451223 | Palestinian | Lippold et al., 2014.       |
|        |    | KF451261 | Palestinian | Lippold et al., 2014.       |
|        |    | JX273267 | Turkish     | Costa et al., 2013.         |
| K1a4f1 | 4  |          |             |                             |
|        |    | JX153062 | Italian     | Raule et al., 2014.         |
|        |    | JQ704764 | Malta       | Behar et al., 2012.         |
|        |    | EF177416 | Portuguese  | Pereira 2007.               |
|        |    | NA20828  | Tuscan      | Gomez-Carbala et al., 2015. |

|        |        |   |          |           |                         |
|--------|--------|---|----------|-----------|-------------------------|
| K1a4g  |        | 2 | EU219921 | NA        | Family Tree DNA         |
|        |        |   | JQ705656 | Swiss     | Behar et al., 2012.     |
| K1a4h  |        | 4 | JQ703361 | NA        | Behar et al., 2012.     |
|        | K1a4h1 | 3 | KC911589 | Armenian  | Derenko et al., 2013.   |
|        |        |   | EU564851 | NA        | Family Tree DNA         |
|        |        |   | JQ702911 | NA        | Behar et al., 2012.     |
| K1a4i  |        | 4 | JX273270 | Adygei    | Costa et al., 2013.     |
|        |        |   | KJ446006 | Adygei    | Zheng et al., 2014.     |
|        |        |   | HM852890 | Georgian  | Schonberg et al., 2011. |
|        |        |   | JX273269 | Turkish   | Costa et al., 2013.     |
| K1a4jj |        | 5 | JX273271 | Azeri     | Costa et al., 2013.     |
|        | K1a4j  | 4 | KC878714 | Turkish   | Costa et al., 2013.     |
|        |        | 3 | KC911477 | Armenian  | Derenko et al., 2013.   |
|        |        |   | JX273292 | Kurdish   | Costa et al., 2013.     |
|        |        |   | JX273290 | Kurdish   | Costa et al., 2013.     |
| K1a4k  |        | 2 | JQ705162 | NA        | Behar et al., 2012.     |
|        |        |   | 138_Sb   | Serbian   | this study              |
| K1a4l  |        | 2 | KT634229 | Bulgarian | Family Tree DNA         |
|        |        |   | 4_Sb     | Serbian   | this study              |
| K1a30  |        | 6 |          |           |                         |
| K1a30a |        | 3 | KC878710 | Turkish   | Costa et al., 2013.     |
|        |        |   | KC878711 | Turkish   | Costa et al., 2013.     |
|        |        |   | KM986530 | Yemen     | Vyas et al., 2016.      |

|        |    |          |             |                       |
|--------|----|----------|-------------|-----------------------|
| K1a30b | 3  | JN202911 | French      | Family Tree DNA       |
|        |    | JQ705751 | NA          | Behar et al., 2012.   |
|        |    | 89_Sb    | Serbian     | this study            |
| K1b1c  | 19 | EU600370 | Druze       | Shlush et al., 2008.  |
|        |    | JX273293 | Druze       | Costa et al., 2013.   |
|        |    | GU455378 | English     | Family Tree DNA       |
|        |    | KC911572 | Kurdish     | Derenko et al., 2013. |
|        |    | JQ703003 | NA          | Behar et al., 2012.   |
|        |    | 5_Sb     | Serbian     | this study            |
|        |    | 148_Sb   | Serbian     | this study            |
|        |    | 145_Sb   | Serbian     | this study            |
|        |    | KC878717 | Turkish     | Costa et al., 2013.   |
|        |    | KC878716 | Turkish     | Costa et al., 2013.   |
|        |    | KP744017 | USA         | Family Tree DNA       |
| K1b1c1 | 3  | K663     | Polish      | this study            |
|        |    | P142     | Polish      | this study            |
|        |    | SI_218   | Slovak      | this study            |
| K1b1c2 | 3  | JX152834 | Danish      | Raule et al., 2014.   |
|        |    | JX153719 | Danish      | Raule et al., 2014.   |
|        |    | KF162621 | Danish      | Li et al., 2014.      |
| K1b1c3 | 2  | DQ301810 | Palestinian | Behar et al., 2006.   |
|        |    | KC911594 | Qashqai     | Derenko et al., 2013. |
| K1b2a2 | 22 | KF162900 | Danish      | Li et al., 2014.      |
|        |    | JQ705044 | German      | Behar et al., 2012.   |
|        |    | JQ705736 | Irish       | Behar et al., 2012.   |
|        |    | MC1665   | Irish       | mtDNA Community       |
|        |    | KJ856701 | Khamnigan   | Derenko et al., 2014. |
|        |    | JQ702849 | Polish      | Behar et al., 2012.   |

|       |        |          |   |          |           |                             |
|-------|--------|----------|---|----------|-----------|-----------------------------|
| U1a1c | U1a1c1 | K1b2a2a  | 6 | KJ856823 | Russian   | Derenko et al., 2014.       |
|       |        |          |   | 23_Sb    | Serbian   | this study                  |
|       |        |          |   | KC878718 | Turkish   | Costa et al., 2013.         |
|       |        |          |   | JQ702636 | NA        | Behar et al., 2012.         |
|       |        |          |   | JQ702325 | NA        | Behar et al., 2012.         |
|       |        |          |   | MC1733   | Swedish   | mtDNA Community             |
|       |        | K1b2a2b  | 5 | KP419691 | Swedish   | Family Tree DNA             |
|       |        |          |   | KT821555 | Swedish   | Family Tree DNA             |
|       |        |          |   | EU849091 | Swedish   | Family Tree DNA             |
|       |        |          |   | KJ856772 | Buryat    | Derenko et al., 2014.       |
|       |        |          |   | KJ856838 | Russian   | Derenko et al., 2014.       |
|       |        |          |   | KJ856840 | Russian   | Derenko et al., 2014.       |
|       |        | K1b2a2c  | 2 | JQ774501 | Russian   | Family Tree DNA             |
|       |        |          |   | KJ856836 | Russian   | Derenko et al., 2014.       |
|       |        |          |   | KF163028 | Danish    | Li et al., 2014.            |
|       |        |          |   | EU372659 | NA        | Family Tree DNA             |
|       |        |          |   | 22       |           |                             |
|       |        |          |   | 19       |           |                             |
|       |        | U1a1c1a  | 2 | KM434265 | USA       | Family Tree DNA             |
|       |        |          |   | AY714038 | Indian    | Palanichamy et al., 2004.   |
|       |        |          |   | FJ748753 | Tibetan   | Ji et al., 2012.            |
|       |        | U1a1c1b  | 2 | JQ704034 | Italian   | Behar et al., 2012.         |
|       |        |          |   | NA20826  | Tuscan    | Gomez-Carbala et al., 2015. |
|       |        | U1a1c1c  | 5 | KC911388 | Persian   | Derenko et al., 2013.       |
|       |        |          |   | KC911365 | Persian   | Derenko et al., 2013.       |
|       |        | U1a1c1c1 | 3 | JN872374 | Italian   | Perli et al., 2012.         |
|       |        |          |   | DQ523621 | Sardinian | Fraumene et al., 2006.      |

|         |    |          |            |                           |
|---------|----|----------|------------|---------------------------|
| U1a1c1d | 9  | DQ523634 | Sardinian  | Fraumene et al., 2006.    |
|         |    | JX462732 | Indian     | Khan et al., NCBI         |
|         |    | KF451000 | Pakistani  | Lippold et al., 2014.     |
|         |    | KM047208 | Polish     | Skonieczna et al., 2015.  |
|         | 2  | KC911306 | Persian    | Derenko et al., 2013.     |
|         |    | KC911527 | Qashqai    | Derenko et al., 2013.     |
|         | 2  | MC3198   | Indian     | mtDNA Community           |
|         |    | AY714042 | Indian     | Palanichamy et al., 2004. |
|         | 2  | KC911457 | Azeri      | Derenko et al., 2013.     |
|         |    | KF451137 | Beduin     | Lippold et al., 2014.     |
| U1a1c2  | 3  | 168_Sb   | Serbian    | this study                |
|         |    | 93_Sb    | Serbian    | this study                |
|         |    | JX153116 | Greek      | Raule et al., 2014.       |
| U2e1b1  | 18 | KJ856731 | Belarusian | Derenko et al., 2014.     |
|         |    | KJ856725 | Belarusian | Derenko et al., 2014.     |
|         |    | JQ664543 | Croatian   | Fu et al., 2012.          |
|         |    | KF161340 | Danish     | Li et al., 2014.          |
|         |    | KF163041 | Danish     | Li et al., 2014.          |
|         |    | KF162886 | Danish     | Li et al., 2014.          |
|         |    | JQ705384 | Finnish    | Behar et al., 2012.       |
|         |    | MC2793   | NA         | mtDNA Community           |
|         |    | JQ702663 | NA         | Behar et al., 2012.       |
|         |    | JQ704773 | NA         | Behar et al., 2012.       |
|         |    | KJ856798 | Polish     | Derenko et al., 2014.     |
|         |    | JQ703917 | Polish     | Behar et al., 2012.       |
|         |    | KJ856830 | Russian    | Derenko et al., 2014.     |
|         |    | 170_Sb   | Serbian    | this study                |
|         |    | KJ856835 | Ukrainian  | Derenko et al., 2014.     |

|     |         |    |          |                              |                             |         |
|-----|---------|----|----------|------------------------------|-----------------------------|---------|
| U3a | U2e1b1a | 3  | KJ856817 | Polish                       | Derenko et al., 2014.       | ancient |
|     |         |    | KJ856812 | Polish                       | Derenko et al., 2014.       |         |
|     |         |    | KJ856833 | Ukrainian                    | Derenko et al., 2014.       |         |
|     | U2e2a1d | 12 | KJ856698 | Belarusian                   | Derenko et al., 2014.       |         |
|     |         |    | HM156683 | Indian                       | Govindaraj et al., 2011.    |         |
|     |         |    | HM156688 | Indian                       | Govindaraj et al., 2011.    |         |
|     |         |    | JQ701947 | NA                           | Behar et al., 2012.         |         |
|     |         |    | JQ702004 | NA                           | Behar et al., 2012.         |         |
|     |         |    | JQ701890 | NA                           | Behar et al., 2012.         |         |
|     |         |    | KJ856714 | Russian                      | Derenko et al., 2014.       |         |
|     |         |    | KJ856678 | Russian                      | Derenko et al., 2014.       |         |
|     |         |    | KJ856696 | Russian                      | Derenko et al., 2014.       |         |
|     |         |    | KJ856710 | Russian                      | Derenko et al., 2014.       |         |
|     |         |    | KJ856690 | Russian                      | Derenko et al., 2014.       |         |
|     |         |    | 52_Sb    | Serbian                      | this study                  |         |
|     |         | 82 | HQ436348 | Armenian                     | Family Tree DNA             |         |
|     |         |    | HM852891 | Georgian                     | Schonberg et al., 2011.     |         |
|     |         |    | KT779172 | Lebanese                     | Matisoo-Smith et al., 2016. |         |
|     | U3a1    | 54 | KJ856809 | Czech                        | Derenko et al., 2014.       |         |
|     |         |    | JX153939 | Danish                       | Raule et al., 2014.         |         |
|     |         |    | KF162006 | Danish                       | Li et al., 2014.            |         |
|     |         |    | JX152854 | Danish                       | Raule et al., 2014.         |         |
|     |         |    | KF162390 | Danish                       | Li et al., 2014.            |         |
|     |         |    | KF162263 | Danish                       | Li et al., 2014.            |         |
|     |         |    | SALZ3B   | Salzmünde-Schiebzig, Germany | Haak et al., 2015.          |         |
|     |         |    | KT779191 | Lebanese                     | Matisoo-Smith et al., 2016. |         |
|     |         |    | MC825    | Mexican                      | mtDNA Community             |         |
|     |         |    | EU057183 | NA                           | Family Tree DNA             |         |
|     |         |    | JQ705387 | NA                           | Behar et al., 2012.         |         |



|        |    |          |            |                                  |
|--------|----|----------|------------|----------------------------------|
| U3a1a  | 16 | HM625682 | NA         | Kloss-Brandstatter et al., 2010. |
|        |    | HQ404665 | Spanish    | Family Tree DNA                  |
|        |    | MC1883   | USA        | mtDNA Community                  |
|        |    | KF161897 | Danish     | Li et al., 2014.                 |
|        |    | KF162268 | Danish     | Li et al., 2014.                 |
|        |    | KF161357 | Danish     | Li et al., 2014.                 |
|        |    | JQ704950 | Irish      | Behar et al., 2012.              |
|        |    | MC838    | Irish      | mtDNA Community                  |
|        |    | JX153017 | Italian    | Raule et al., 2014.              |
|        |    | MC1112   | Lithuanian | mtDNA Community                  |
|        |    | JQ703990 | NA         | Behar et al., 2012.              |
|        |    | MC2790   | NA         | mtDNA Community                  |
|        |    | JQ705871 | NA         | Behar et al., 2012.              |
|        |    | JN203207 | Polish     | Family Tree DNA                  |
|        |    | KJ856806 | Russian    | Derenko et al., 2014.            |
| U3a1b  | 3  | GU122986 | Russian    | Malyarchuk et al., 2010.         |
|        |    | KJ856754 | Russian    | Derenko et al., 2014.            |
|        |    | FJ968795 | USA        | Family Tree DNA                  |
|        |    | MC4085   | USA        | mtDNA Community                  |
| U3a1c  | 14 | JQ702681 | NA         | Behar et al., 2012.              |
|        |    | MC146    | NA         | mtDNA Community                  |
|        |    | JQ702677 | NA         | Behar et al., 2012.              |
|        |    | KF162718 | Danish     | Li et al., 2014.                 |
|        |    | JX154057 | Danish     | Raule et al., 2014.              |
|        |    | KF162675 | Danish     | Li et al., 2014.                 |
|        |    | KF161178 | Danish     | Li et al., 2014.                 |
| U3a1c1 | 7  | KF161165 | Danish     | Li et al., 2014.                 |
|        |    | JQ703769 | German     | Behar et al., 2012.              |
|        |    | AF381982 | Spanish    | Maca-Meyer et al., 2001.         |
|        |    | KF161553 | Danish     | Li et al., 2014.                 |

|       |        |    |          |            |                         |
|-------|--------|----|----------|------------|-------------------------|
|       |        |    | KF161262 | Danish     | Li et al., 2014.        |
|       |        |    | JX153689 | Danish     | Raule et al., 2014.     |
|       |        |    | HQ286323 | English    | Family Tree DNA         |
|       |        |    | MC622    | Irish      | mtDNA Community         |
|       |        |    | JQ705739 | NA         | Behar et al., 2012.     |
|       |        |    | JQ704420 | NA         | Behar et al., 2012.     |
| U3a1d |        | 2  |          |            |                         |
|       |        |    | 144_Sb   | Serbian    | this study              |
|       |        |    | DQ156213 | Spanish    | Montiel-Sosa 2005.      |
| U3a1e |        | 5  |          |            |                         |
|       |        |    | KF162097 | Danish     | Li et al., 2014.        |
|       |        |    | KF162952 | Danish     | Li et al., 2014.        |
|       |        |    | KF161806 | Danish     | Li et al., 2014.        |
|       |        |    | JX154025 | Danish     | Raule et al., 2014.     |
|       |        |    | JQ705014 |            | Behar et al., 2012.     |
| U3a2  |        | 12 |          |            |                         |
|       |        |    | MC1326   | English    | mtDNA Community         |
|       |        |    | MC2685   | NA         | mtDNA Community         |
|       |        |    | KC911305 | Persian    | Derenko et al., 2013.   |
|       |        |    | JQ618033 | USA        | Family Tree DNA         |
| U3a2a |        | 8  |          |            |                         |
|       |        |    | KJ856832 | Belarusian | Derenko et al., 2014.   |
|       |        |    | JX153094 | Italian    | Raule et al., 2014.     |
|       |        |    | FJ348224 | NA         | Pichler 2010.           |
|       |        |    | KP726893 | Russian    | Family Tree DNA         |
|       | U3a2a1 | 4  |          |            |                         |
|       |        |    | KC911314 | Persian    | Derenko et al., 2013.   |
|       |        |    | KC911522 | Qashqai    | Derenko et al., 2013.   |
|       |        |    | KC911568 | Qashqai    | Derenko et al., 2013.   |
|       |        |    | AY882383 | Yemen      | Achilli et al., 2005.   |
| U3a3  |        | 4  |          |            |                         |
|       |        |    | 95_Sb    | Serbian    | this study              |
| U3a3a |        | 3  |          |            |                         |
|       |        |    | HM852895 | Georgian   | Schonberg et al., 2011. |

|      |     |          |            |                             |
|------|-----|----------|------------|-----------------------------|
| U3a4 | 4   | JQ704440 | NA         | Behar et al., 2012.         |
|      |     | KC911491 | Persian    | Derenko et al., 2013.       |
|      |     | KT779163 | Lebanese   | Matisoo-Smith et al., 2016. |
|      |     | KT779202 | Lebanese   | Matisoo-Smith et al., 2016. |
|      |     | KT779189 | Lebanese   | Matisoo-Smith et al., 2016. |
| U3a5 | 3   | KC911550 | Persian    | Derenko et al., 2013.       |
|      |     | KJ445942 | Algerian   | Zheng et al., 2014.         |
|      |     | KJ445941 | Algerian   | Zheng et al., 2014.         |
|      |     | KJ445940 | Algerian   | Zheng et al., 2014.         |
| U3a6 | 2   | KP184339 | German     | Family Tree DNA             |
|      |     | AF381983 | Moroccan   | Maca-Meyer et al., 2001.    |
| U4a2 | 104 | HM453049 | Austrian   | Family Tree DNA             |
|      |     | MC495    | Austrian   | mtDNA Community             |
|      |     | EU545430 | Belarusian | Malyarchuk et al., 2008.    |
|      |     | KF161939 | Danish     | Li et al., 2014.            |
|      |     | KF162727 | Danish     | Li et al., 2014.            |
|      |     | MC1595   | Dutch      | mtDNA Community             |
|      |     | MC1012   | English    | mtDNA Community             |
|      |     | JQ704052 | Estonian   | Behar et al., 2012.         |
|      |     | JQ705609 | Finnish    | Behar et al., 2012.         |
|      |     | HM852885 | Georgian   | Schonberg et al., 2011.     |
|      |     | JX153114 | Italian    | Raule et al., 2014.         |
|      |     | DQ156209 | NA         | Montiel-Sosa 2005.          |
|      |     | KC911285 | Persian    | Derenko et al., 2013.       |
|      |     | KJ856813 | Polish     | Derenko et al., 2014.       |
|      |     | KC911382 | Qashqai    | Derenko et al., 2013.       |
|      |     | KF451402 | Russian    | Lippold et al., 2014.       |
|      |     | EU545453 | Slovak     | Malyarchuk et al., 2008.    |
|      |     | EU545455 | Slovak     | Malyarchuk et al., 2008.    |

U4a2a

35

|          |            |                          |
|----------|------------|--------------------------|
| KJ856727 | Altaian    | Derenko et al., 2014.    |
| KJ856718 | Altaian    | Derenko et al., 2014.    |
| KF162833 | Danish     | Li et al., 2014.         |
| EST74    | Estonian   | Stoljarova et al., 2016. |
| JX153621 | Finnish    | Raule et al., 2014.      |
| AY882387 | Italian    | Achilli et al., 2005.    |
| MC387    | Lithuanian | mtDNA Community          |
| JQ702403 | Lithuanian | Behar et al., 2012.      |
| EF222249 | NA         | Malyarchuk et al., 2008. |
| JQ705907 | NA         | Behar et al., 2012.      |
| KM047234 | Polish     | Skonieczna et al., 2015. |
| EU545450 | Russian    | Malyarchuk et al., 2008. |
| EU545440 | Russian    | Malyarchuk et al., 2008. |
| KM096779 | Serbian    | Davidovic et al., 2015.  |
| EU545458 | Slovak     | Malyarchuk et al., 2008. |
| JQ705363 | Swedish    | Behar et al., 2012.      |

U4a2a1

8

|          |         |                          |
|----------|---------|--------------------------|
| KJ445968 | Chinese | Zheng et al., 2014.      |
| KF162134 | Danish  | Li et al., 2014.         |
| EF222236 | Polish  | Malyarchuk et al., 2008. |
| EF222250 | Polish  | Malyarchuk et al., 2008. |
| EF222237 | Polish  | Malyarchuk et al., 2008. |
| KM096774 | Serbian | Davidovic et al., 2015.  |
| JQ702094 | Swedish | Behar et al., 2012.      |
| MC438    | Swedish | mtDNA Community          |

U4a2a2

5

|          |        |                          |
|----------|--------|--------------------------|
| JQ705566 | Danish | Behar et al., 2012.      |
| JX154043 | Danish | Raule et al., 2014.      |
| JQ704321 | German | Behar et al., 2012.      |
| EF222238 | NA     | Malyarchuk et al., 2008. |
| EU545461 | Slovak | Malyarchuk et al., 2008. |

U4a2a3

2

|          |    |                          |
|----------|----|--------------------------|
| EF222239 | NA | Malyarchuk et al., 2008. |
|----------|----|--------------------------|

|       |        |    |          |            |                             |
|-------|--------|----|----------|------------|-----------------------------|
| U4a2b | U4a2a4 | 2  | EU545446 | Russian    | Malyarchuk et al., 2008.    |
|       |        |    | MC824    | NA         | mtDNA Community             |
|       |        |    | JQ702942 | NA         | Behar et al., 2012.         |
|       | U4a2a5 | 2  | EU545425 | Czech      | Malyarchuk et al., 2008.    |
|       |        |    | KM047229 | Polish     | Skonieczna et al., 2015.    |
|       |        |    |          |            |                             |
|       |        | 13 | MC184    | Austrian   | mtDNA Community             |
|       |        |    | KF162652 | Danish     | Li et al., 2014.            |
|       |        |    | JX153535 | Danish     | Raule et al., 2014.         |
|       |        |    | AY339550 | Finnish    | Moilanen et al., 2003.      |
|       |        |    | JQ705121 | German     | Behar et al., 2012.         |
|       |        |    | MC2651   | NA         | mtDNA Community             |
|       |        |    | EF222241 | Polish     | Malyarchuk et al., 2008.    |
|       |        |    | EF222240 | Polish     | Malyarchuk et al., 2008.    |
|       |        |    | GU123033 | Russian    | Malyarchuk et al., 2010.    |
|       |        |    | MC48     | Russian    | mtDNA Community             |
| U4a2c | U4a2c1 | 5  | NA20512  | Tuscan     | Gomez-Carbala et al., 2015. |
|       |        |    | JQ703385 | UK         | Behar et al., 2012.         |
|       |        |    | JX239772 | USA        | Family Tree DNA             |
|       |        |    |          |            |                             |
|       |        |    |          |            |                             |
|       |        |    |          |            |                             |
|       |        |    |          |            |                             |
|       |        |    |          |            |                             |
|       |        |    |          |            |                             |
|       |        |    |          |            |                             |
| U4a2d | U4a2c2 | 2  | EU545464 | Belarusian | Malyarchuk et al., 2008.    |
|       |        |    | KM096781 | Serbian    | Davidovic et al., 2015.     |
|       |        |    |          |            |                             |
|       |        | 3  | EU545421 | Czech      | Malyarchuk et al., 2008.    |
|       |        |    | JQ705152 | German     | Behar et al., 2012.         |
|       |        |    | JQ702351 | Scottish   | Behar et al., 2012.         |
|       |        |    |          |            |                             |

|        |   |          |         |                          |
|--------|---|----------|---------|--------------------------|
| U4a2e  | 4 | JQ702862 | NA      | Behar et al., 2012.      |
|        |   | JQ704772 | NA      | Behar et al., 2012.      |
|        |   | EU545442 | Russian | Malyarchuk et al., 2008. |
|        |   | EU545456 | Slovak  | Malyarchuk et al., 2008. |
| U4a2f  | 4 | KF162665 | Danish  | Li et al., 2014.         |
|        |   | JQ705828 | NA      | Behar et al., 2012.      |
|        |   | JQ704811 | Spanish | Behar et al., 2012.      |
|        |   | KM233203 | Swedish | Family Tree DNA          |
| U4a2g  | 9 | JX154049 | Danish  | Raule et al., 2014.      |
|        |   | KF450863 | Hazar   | Lippold et al., 2014.    |
|        |   | JQ480650 | NA      | Family Tree DNA          |
|        |   | KM047227 | Polish  | Skonieczna et al., 2015. |
|        |   | MC501    | Russian | mtDNA Community          |
| U4a2g1 | 4 | MC963    | Finnish | mtDNA Community          |
|        |   | KP691018 | Russian | Family Tree DNA          |
|        |   | EU545434 | Russian | Malyarchuk et al., 2008. |
|        |   | KM096773 | Serbian | Davidovic et al., 2015.  |
| U4a2h  | 7 | KF161329 | Danish  | Li et al., 2014.         |
|        |   | EF222235 | NA      | Malyarchuk et al., 2008. |
|        |   | JX289843 | USA     | Family Tree DNA          |
| U4a2h1 | 4 | JX152824 | Danish  | Raule et al., 2014.      |
|        |   | JX153725 | Danish  | Raule et al., 2014.      |
|        |   | KF161509 | Danish  | Li et al., 2014.         |
|        |   | JQ702549 | Dutch   | Behar et al., 2012.      |
| U4a2i  | 4 | MC1371   | NA      | mtDNA Community          |
|        |   | JQ705655 | NA      | Behar et al., 2012.      |
|        |   | JQ701841 | NA      | Behar et al., 2012.      |

|      |       |        |           |  |          |                     |                          |                 |
|------|-------|--------|-----------|--|----------|---------------------|--------------------------|-----------------|
|      |       |        |           |  | KJ856818 | Polish              | Derenko et al., 2014.    |                 |
|      | U4a2j |        |           |  | 2        |                     |                          |                 |
|      |       |        |           |  | JQ705919 | English             | Behar et al., 2012.      |                 |
|      |       |        |           |  | KJ716337 | German              | Family Tree DNA          |                 |
| U4b  |       |        |           |  | 103      |                     |                          |                 |
|      |       |        |           |  | KC911585 | Persian             | Derenko et al., 2013.    |                 |
|      |       |        |           |  | JQ705130 | Portuguese          | Behar et al., 2012.      |                 |
|      |       |        |           |  | EU545444 | Russian             | Malyarchuk et al., 2008. |                 |
|      |       |        |           |  | 11_Sb    | Serbian             | this study               |                 |
| U4b1 |       |        |           |  | 73       |                     |                          |                 |
|      | U4b1a |        |           |  | 42       |                     |                          |                 |
|      |       | U4b1a1 |           |  | 16       |                     |                          |                 |
|      |       |        | U4b1a1a   |  | 15       | HM044301            | Icelandic                | Family Tree DNA |
|      |       |        |           |  | JQ705255 | English             | Behar et al., 2012.      |                 |
|      |       |        |           |  | JQ705865 | NA                  | Behar et al., 2012.      |                 |
|      |       |        |           |  | JQ703912 | NA                  | Behar et al., 2012.      |                 |
|      |       |        |           |  | 84_Sb    | Serbian             | this study               |                 |
|      |       |        |           |  | KJ856687 | Ukrainian           | Derenko et al., 2014.    |                 |
|      |       |        | U4b1a1a1  |  | 10       |                     |                          |                 |
|      |       |        |           |  | AY882388 | Adygei              | Achilli et al., 2005.    |                 |
|      |       |        |           |  | KJ445953 | Adygei              | Zheng et al., 2014.      |                 |
|      |       |        |           |  | ESP11    | Esperstedt, Germany | Haak et al., 2015.       | ancient         |
|      |       |        |           |  | EF660983 | Italian             | Gasparre et al., 2007.   |                 |
|      |       |        |           |  | KJ445952 | Pakistani           | Zheng et al., 2014.      |                 |
|      |       |        |           |  | KC911524 | Persian             | Derenko et al., 2013.    |                 |
|      |       |        |           |  | 68_Sb    | Serbian             | this study               |                 |
|      |       |        |           |  | FJ460530 | Tunisian            | Costa et al., 2009.      |                 |
|      |       |        | U4b1a1a1a |  | 2        |                     |                          |                 |
|      |       |        |           |  | JX152963 | Greek               | Raule et al., 2014.      |                 |
|      |       |        |           |  | 104_Sb   | Serbian             | this study               |                 |
|      |       |        |           |  | 13       |                     |                          |                 |
|      |       |        |           |  | HM041972 | Canadian            | Family Tree DNA          |                 |
|      |       |        |           |  | JQ702446 | NA                  | Behar et al., 2012.      |                 |
|      |       | U4b1a2 |           |  |          |                     |                          |                 |

|           |         |    |          |            |                                  |
|-----------|---------|----|----------|------------|----------------------------------|
|           | U4b1a2a | 6  | EU545415 | Belarusian | Malyarchuk et al., 2008.         |
|           |         |    | JX153652 | Danish     | Raule et al., 2014.              |
|           |         |    | KF162643 | Danish     | Li et al., 2014.                 |
|           |         |    | KF163023 | Danish     | Li et al., 2014.                 |
|           |         |    | EF660921 | Italian    | Gasparre et al., 2007.           |
|           |         |    | JQ704098 | NA         | Behar et al., 2012.              |
|           | U4b1a2b | 5  | JX153376 | Danish     | Raule et al., 2014.              |
|           |         |    | JQ701876 | NA         | Behar et al., 2012.              |
|           |         |    | MC3772   | NA         | mtDNA Community                  |
|           |         |    | JQ701990 | NA         | Behar et al., 2012.              |
|           |         |    | MC203    | Norwegian  | mtDNA Community                  |
| U4b1a3    |         | 8  |          |            |                                  |
|           | U4b1a3a | 7  | EU545419 | Polish     | Malyarchuk et al., 2008.         |
|           |         |    | KF161791 | Danish     | Li et al., 2014.                 |
|           |         |    | KF162688 | Danish     | Li et al., 2014.                 |
|           |         |    | EU571946 | Hungarian  | Maasz 2008.                      |
|           |         |    | HM625699 | NA         | Kloss-Brandstatter et al., 2010. |
|           |         |    | KJ801420 | NA         | Lang et al., 2015.               |
|           |         |    | FJ858802 | USA        | Family Tree DNA                  |
|           |         |    | MC2380   | USA        | mtDNA Community                  |
| U4b1a4    |         | 5  |          |            |                                  |
|           |         |    | KF450970 | Kalash     | Lippold et al., 2014.            |
|           |         |    | KC911400 | Qashqai    | Derenko et al., 2013.            |
|           |         |    | FJ147313 | Russian    | Sukernik et al., 2012.           |
|           |         |    | FJ147314 | Russian    | Sukernik et al., 2012.           |
|           |         |    | FJ147316 | Russian    | Sukernik et al., 2012.           |
| U4b1b'b1b |         | 31 |          |            |                                  |
|           |         |    | FJ147315 | Altaian    | Sukernik et al., 2012.           |
| U4b1b     |         | 30 |          |            |                                  |
|           | U4b1b1  | 29 |          |            |                                  |
|           |         |    | JN647925 | Armenian   | Family Tree DNA                  |



|          |   |          |           |                          |
|----------|---|----------|-----------|--------------------------|
| U4b1b1a  | 7 | HM852897 | Georgian  | Schonberg et al., 2011.  |
|          |   | HM852884 | Georgian  | Schonberg et al., 2011.  |
|          |   | JQ705342 | NA        | Behar et al., 2012.      |
|          |   | JQ705560 | NA        | Behar et al., 2012.      |
|          |   | GQ859272 | NA        | Guillet 2010.            |
|          |   | JQ704021 | NA        | Behar et al., 2012.      |
|          |   | JQ701911 | NA        | Behar et al., 2012.      |
|          |   | KJ801419 | NA        | Lang et al., 2015.       |
|          |   | KR105198 | Scottish  | Family Tree DNA          |
|          |   | EU545463 | Slovak    | Malyarchuk et al., 2008. |
| U4b1b1b  | 4 | MC275    | Canadian  | mtDNA Community          |
|          |   | HM535647 | English   | Family Tree DNA          |
|          |   | GU797476 | Irish     | Family Tree DNA          |
|          |   | MC4218   | NA        | mtDNA Community          |
|          |   | JQ703886 | NA        | Behar et al., 2012.      |
|          |   | MC2193   | Scottish  | mtDNA Community          |
|          |   | MC2234   | USA       | mtDNA Community          |
| U4b1b1c' | 6 | JX153717 | Danish    | Raule et al., 2014.      |
|          |   | JQ704155 | NA        | Behar et al., 2012.      |
|          |   | JQ702864 | NA        | Behar et al., 2012.      |
|          |   | KM101946 | USA       | Just et al., 2015.       |
| U4b1b1c  | 3 | KJ856738 | Altaian   | Derenko et al., 2014.    |
|          |   | KJ856683 | Russian   | Derenko et al., 2014.    |
|          |   | KJ856794 | Russian   | Derenko et al., 2014.    |
| U4b1b1d  | 1 | KC911460 | Khorasani | Derenko et al., 2013.    |
|          |   | GU123041 | Russian   | Malyarchuk et al., 2010. |
|          |   | GU123039 | Russian   | Malyarchuk et al., 2010. |
|          |   | JX153693 | Danish    | Raule et al., 2014.      |

|       |         |    |          |                   |                             |
|-------|---------|----|----------|-------------------|-----------------------------|
|       | U4b1b2  | 1  | JQ704676 | NA                | Behar et al., 2012.         |
| U4b2  |         | 11 | KF450991 | Burusho           | Lippold et al., 2014.       |
|       |         |    | EU140898 | NA                | Family Tree DNA             |
| U4b2a |         | 9  | JQ701937 | NA                | Behar et al., 2012.         |
|       |         |    | JQ702783 | NA                | Behar et al., 2012.         |
|       |         |    | KM101964 | USA               | Just et al., 2015.          |
|       | U4b2a1  | 6  | KF161555 | Danish            | Li et al., 2014.            |
|       |         |    | GQ891957 | USA               | Family Tree DNA             |
|       | U4b2a1a | 4  | HQ190906 | German            | Family Tree DNA             |
|       |         |    | EF452295 | NA                | Family Tree DNA             |
|       |         |    | GU365881 | Northern European | Family Tree DNA             |
|       |         |    | HM856584 | USA               | Family Tree DNA             |
| U4b3  |         | 13 | KJ856783 | Buryat            | Derenko et al., 2014.       |
|       |         |    | JX152874 | Danish            | Raule et al., 2014.         |
|       |         |    | JX152951 | Danish            | Raule et al., 2014.         |
|       |         |    | KF161430 | Danish            | Li et al., 2014.            |
|       |         |    | KF162145 | Danish            | Li et al., 2014.            |
|       |         |    | JX152952 | Danish            | Raule et al., 2014.         |
|       |         |    | EST110   | Estonian          | Stoljarova et al., 2016.    |
|       |         |    | EST98    | Estonian          | Stoljarova et al., 2016.    |
|       |         |    | EU007874 | Kchanti           | Ingman et al., 2007.        |
|       |         |    | KT779185 | Lebanese          | Matisoo-Smith et al., 2016. |
|       |         |    | KT779199 | Lebanese          | Matisoo-Smith et al., 2016. |
|       |         |    | FJ147322 | Siberian          | Sukernik et al., 2012.      |
|       |         |    | GU727823 | USA               | Family Tree DNA             |
| U4b4  |         | 2  | KF162547 | Danish            | Li et al., 2014.            |
|       |         |    | JQ702211 | NA                | Behar et al., 2012.         |

U4c1

49

|          |            |                          |
|----------|------------|--------------------------|
| EU545465 | Belarusian | Malyarchuk et al., 2008. |
| KJ856792 | Czech      | Derenko et al., 2014.    |
| KF162508 | Danish     | Li et al., 2014.         |
| KF162433 | Danish     | Li et al., 2014.         |
| KF161496 | Danish     | Li et al., 2014.         |
| JQ704326 | Dutch      | Behar et al., 2012.      |
| JQ704993 | English    | Behar et al., 2012.      |
| EST24    | Estonian   | Stoljarova et al., 2016. |
| FJ348178 | German     | Pichler 2010.            |
| HQ286589 | Hungarian  | Family Tree DNA          |
| JQ704121 | Irish      | Behar et al., 2012.      |
| MC3995   | NA         | mtDNA Community          |
| EU135973 | NA         | Family Tree DNA          |
| MC460    | NA         | mtDNA Community          |
| JQ704181 | NA         | Behar et al., 2012.      |
| KC911375 | Persian    | Derenko et al., 2013.    |
| KC911396 | Persian    | Derenko et al., 2013.    |
| KC911453 | Persian    | Derenko et al., 2013.    |
| HQ591466 | Polish     | Family Tree DNA          |
| KM047213 | Polish     | Skonieczna et al., 2015. |
| EF222248 | Polish     | Malyarchuk et al., 2008. |
| KP406603 | Romanian   | Family Tree DNA          |
| MC4857   | Romanian   | mtDNA Community          |
| JQ704661 | Scottish   | Behar et al., 2012.      |
| 134_Sb   | Serbian    | this study               |
| EU545462 | Slovak     | Malyarchuk et al., 2008. |
| JQ704675 | UK         | Behar et al., 2012.      |
| GU471242 | USA        | Family Tree DNA          |
| KM101758 | USA        | Just et al., 2015.       |
| HM003577 | USA        | Family Tree DNA          |

U4c1a

3

|          |        |                     |
|----------|--------|---------------------|
| JX153870 | Danish | Raule et al., 2014. |
| KF161599 | Danish | Li et al., 2014.    |

|     |       |        |    |          |            |                          |
|-----|-------|--------|----|----------|------------|--------------------------|
| U4d | U4c1b | U4c1b1 | 5  | KF162998 | Danish     | Li et al., 2014.         |
|     |       |        |    | JX153069 | Italian    | Raule et al., 2014.      |
|     |       |        |    | JX153455 | Italian    | Raule et al., 2014.      |
|     |       |        | 3  | KP733896 | Bulgarian  | Family Tree DNA          |
|     |       |        |    | 66_Sb    | Serbian    | this study               |
|     |       |        |    | 53_Sb    | Serbian    | this study               |
|     |       |        | 2  |          |            |                          |
|     |       |        |    | KF161305 | Danish     | Li et al., 2014.         |
|     |       |        |    | KF161597 | Danish     | Li et al., 2014.         |
|     |       |        | 3  |          |            |                          |
|     | U4c1c | U4c1d  |    | JQ702777 | English    | Behar et al., 2012.      |
|     |       |        |    | MC230    | English    | mtDNA Community          |
|     |       |        |    | JQ703900 | UK         | Behar et al., 2012.      |
|     | U4c1e | U4c1f  | 3  |          |            |                          |
|     |       |        |    | KF161794 | Danish     | Li et al., 2014.         |
|     |       |        |    | KU552334 | Swedish    | Family Tree DNA          |
|     |       |        |    | KJ675742 | Swedish    | Family Tree DNA          |
|     | U4d1  | U4d1b  | 3  |          |            |                          |
|     |       |        |    | JX153153 | Danish     | Raule et al., 2014.      |
|     |       |        |    | KF161404 | Danish     | Li et al., 2014.         |
|     |       |        |    | KF162738 | Danish     | Li et al., 2014.         |
|     | U4d1b | U4d1b  | 38 |          |            |                          |
|     |       |        | 21 |          |            |                          |
|     |       |        |    | HQ167735 | Dutch      | Family Tree DNA          |
|     |       |        |    | MC141    | Lithuanian | mtDNA Community          |
|     | U4d1b | U4d1b  |    | MC527    | NA         | mtDNA Community          |
|     |       |        |    | MC3092   | Polish     | mtDNA Community          |
|     |       |        | 8  |          |            |                          |
|     |       |        |    | EST41    | Estonian   | Stoljarova et al., 2016. |
|     |       |        |    | EST92    | Estonian   | Stoljarova et al., 2016. |
|     |       |        |    | EST108   | Estonian   | Stoljarova et al., 2016. |
|     |       |        |    | MC3320   | German     | mtDNA Community          |

|       |         |          |             |                          |
|-------|---------|----------|-------------|--------------------------|
| U4d1a |         | MC3265   | Polish      | mtDNA Community          |
|       |         | EU545448 | Russian     | Malyarchuk et al., 2008. |
|       |         | EU545438 | Russian     | Malyarchuk et al., 2008. |
|       |         | GU122982 | Russian     | Malyarchuk et al., 2010. |
|       | U4d1a1  | GU123021 | Russian     | Malyarchuk et al., 2010. |
|       |         | EST95    | Estonian    | Stoljarova et al., 2016. |
|       |         | MC1106   | Finnish     | mtDNA Community          |
|       |         | AY339549 | Finnish     | Moilanen et al., 2003.   |
|       | U4d1a1a | JQ702267 | Finnish     | Behar et al., 2012.      |
|       |         | JQ702154 | NA          | Behar et al., 2012.      |
|       |         | KF451413 | Russian     | Lippold et al., 2014.    |
|       |         | JX153233 | Finnish     | Raule et al., 2014.      |
|       | U4d2    | JQ704741 | NA          | Behar et al., 2012.      |
|       |         | EU007891 | Mongolian   | Ingman et al., 2007.     |
|       |         | KF451219 | Palestinian | Lippold et al., 2014.    |
|       |         | GU122985 | Volga Tatar | Malyarchuk et al., 2010. |
|       | U4d2a   | GU122988 | Volga Tatar | Malyarchuk et al., 2010. |
|       |         | FJ230891 | Nganasan    | Volodko et al., 2008.    |
|       |         | KJ856788 | Tuvinian    | Derenko et al., 2014.    |
|       |         | KF148381 | Yakut       | Duggan et al., 2013.     |
|       | U4d2b   | EU545426 | Czech       | Malyarchuk et al., 2008. |
|       |         | KJ856735 | Khakassian  | Derenko et al., 2014.    |
|       |         | JQ655422 | Polish      | Family Tree DNA          |
|       |         | KJ856699 | Russian     | Derenko et al., 2014.    |
|       |         | KJ445951 | Russian     | Zheng et al., 2014.      |
|       |         | 58_Sb    | Serbian     | this study               |
| U4d3  |         | KF162695 | Danish      | Li et al., 2014.         |

U5a1a1

148

|          |             |                          |
|----------|-------------|--------------------------|
| JQ705926 | NA          | Behar et al., 2012.      |
| GU244374 | Scottish    | Family Tree DNA          |
| GU727822 | USA         | Family Tree DNA          |
| GU296583 | Belarusian  | Malyarchuk et al., 2010. |
| KF161767 | Danish      | Li et al., 2014.         |
| KF161166 | Danish      | Li et al., 2014.         |
| MC2362   | English     | mtDNA Community          |
| KJ868086 | English     | Family Tree DNA          |
| EST52    | Estonian    | Stoljarova et al., 2016. |
| MC712    | German      | mtDNA Community          |
| MC1184   | German      | mtDNA Community          |
| EU523128 | German      | Family Tree DNA          |
| MC3290   | German      | mtDNA Community          |
| JQ702038 | German      | Behar et al., 2012.      |
| MC903    | German      | mtDNA Community          |
| JQ705617 | Irish       | Behar et al., 2012.      |
| MC902    | Irish       | mtDNA Community          |
| MC949    | Irish       | mtDNA Community          |
| KT364276 | Italian     | Ancora et al., 2016.     |
| JQ704708 | NA          | Behar et al., 2012.      |
| JQ705430 | NA          | Behar et al., 2012.      |
| JQ702339 | NA          | Behar et al., 2012.      |
| EU698951 | NA          | Family Tree DNA          |
| JQ703614 | NA          | Behar et al., 2012.      |
| JQ704915 | NA          | Behar et al., 2012.      |
| JQ705132 | NA          | Behar et al., 2012.      |
| KF451199 | Palestinian | Lippold et al., 2014.    |
| EU597527 | Palestinian | Hartmann et al., 2009.   |
| KJ446102 | Palestinian | Zheng et al., 2014.      |
| MC3966   | Romanian    | mtDNA Community          |
| JQ701869 | Spanish     | Behar et al., 2012.      |
| HM852852 | Turkish     | Schonberg et al., 2011.  |
| JQ704930 | UK          | Behar et al., 2012.      |

|             |    |          |                    |                          |         |
|-------------|----|----------|--------------------|--------------------------|---------|
| U5a1a1a'b'h | 48 | MC524    | USA                | mtDNA Community          |         |
|             |    | MC2811   | USA                | mtDNA Community          |         |
|             |    | KM101774 | USA                | Just et al., 2015.       |         |
|             |    | SVP52    | Lopatino I, Russia | Haak et al., 2015.       | ancient |
|             |    | SVP50    | Luzkhi I, Russia   | Haak et al., 2015.       | ancient |
|             |    | JX153722 | Danish             | Raule et al., 2014.      |         |
|             |    | JX152792 | Danish             | Raule et al., 2014.      |         |
|             |    | JX153888 | Danish             | Raule et al., 2014.      |         |
|             |    | KF161673 | Danish             | Li et al., 2014.         |         |
|             |    | JX153802 | Danish             | Raule et al., 2014.      |         |
|             |    | KF161162 | Danish             | Li et al., 2014.         |         |
|             |    | JX153762 | Danish             | Raule et al., 2014.      |         |
|             |    | KF163045 | Danish             | Li et al., 2014.         |         |
|             |    | JX153131 | Danish             | Raule et al., 2014.      |         |
|             |    | JX152809 | Danish             | Raule et al., 2014.      |         |
|             |    | KF161903 | Danish             | Li et al., 2014.         |         |
|             |    | KF161341 | Danish             | Li et al., 2014.         |         |
|             |    | EST56    | Estonian           | Stoljarova et al., 2016. |         |
|             |    | KC763424 | Finnish            | Soini et al., 2013.      |         |
|             |    | KC763419 | Finnish            | Soini et al., 2013.      |         |
| U5a1a1a     | 8  | KJ446101 | Hazar              | Zheng et al., 2014.      |         |
|             |    | KF450864 | Hazar              | Lippold et al., 2014.    |         |
|             |    | GU296636 | Polish             | Malyarchuk et al., 2010. |         |
|             |    | GU296573 | Polish             | Malyarchuk et al., 2010. |         |
|             |    | GU296601 | Russian            | Malyarchuk et al., 2010. |         |
|             |    | GU296594 | Russian            | Malyarchuk et al., 2010. |         |
|             |    | GU296595 | Russian            | Malyarchuk et al., 2010. |         |
|             |    | GU296581 | Belarusian         | Malyarchuk et al., 2010. |         |
|             |    | JQ703906 | Croatian           | Behar et al., 2012.      |         |
|             |    | GU296564 | Czech              | Malyarchuk et al., 2010. |         |
|             |    | MC1285   | German             | mtDNA Community          |         |
|             |    | JQ701834 | German             | Behar et al., 2012.      |         |

|         |    |          |            |                             |
|---------|----|----------|------------|-----------------------------|
| U5a1a1b | 14 | MC1862   | NA         | mtDNA Community             |
|         |    | JQ702085 | NA         | Behar et al., 2012.         |
|         |    | GU296558 | Russian    | Malyarchuk et al., 2010.    |
|         |    | GU296652 | Belarusian | Malyarchuk et al., 2010.    |
|         |    | KF161103 | Danish     | Li et al., 2014.            |
|         |    | KF162072 | Danish     | Li et al., 2014.            |
|         |    | KF162108 | Danish     | Li et al., 2014.            |
|         |    | KF161380 | Danish     | Li et al., 2014.            |
|         |    | KF162148 | Danish     | Li et al., 2014.            |
|         |    | KF162175 | Danish     | Li et al., 2014.            |
|         |    | JQ704725 | English    | Behar et al., 2012.         |
|         |    | GU206811 | Finnish    | Family Tree DNA             |
|         |    | JQ703937 | NA         | Behar et al., 2012.         |
|         |    | KM220890 | Russian    | Family Tree DNA             |
| U5a1a1h | 4  | KR809713 | Swedish    | Family Tree DNA             |
|         |    | MC2703   | Swedish    | mtDNA Community             |
|         |    | NA20812  | Tuscan     | Gomez-Carbala et al., 2015. |
|         |    |          |            |                             |
| U5a1a1c | 11 | KF162056 | Danish     | Li et al., 2014.            |
|         |    | JX153217 | Finnish    | Raule et al., 2014.         |
|         |    | GQ368895 | Polish     | Family Tree DNA             |
|         |    | KM378619 | Russian    | Family Tree DNA             |
|         |    | KF161545 | Danish     | Li et al., 2014.            |
|         |    | KF162861 | Danish     | Li et al., 2014.            |
|         |    | KF162395 | Danish     | Li et al., 2014.            |
|         |    | KF162003 | Danish     | Li et al., 2014.            |
|         |    | KF162704 | Danish     | Li et al., 2014.            |
|         |    | JQ702437 | NA         | Behar et al., 2012.         |
|         |    | JQ704022 | NA         | Behar et al., 2012.         |
|         |    | JQ704658 | NA         | Behar et al., 2012.         |
|         |    | JQ702696 | Russian    | Behar et al., 2012.         |
|         |    | JQ702922 | Scottish   | Behar et al., 2012.         |



|           |    |          |           |                         |
|-----------|----|----------|-----------|-------------------------|
| U5a1a1d'd | 28 | JQ703590 | Slovenian | Behar et al., 2012.     |
|           |    | JQ704920 | NA        | Behar et al., 2012.     |
|           |    | HM852873 | Turkish   | Schonberg et al., 2011. |
| U5a1a1d   | 26 | JX441882 | Czech     | Family Tree DNA         |
|           |    | JX152822 | Danish    | Raule et al., 2014.     |
|           |    | JX153912 | Danish    | Raule et al., 2014.     |
|           |    | KF161640 | Danish    | Li et al., 2014.        |
|           |    | MC2766   | English   | mtDNA Community         |
|           |    | JQ701958 | German    | Behar et al., 2012.     |
|           |    | GU459066 | Irish     | Family Tree DNA         |
|           |    | MC235    | Irish     | mtDNA Community         |
|           |    | JQ704961 | NA        | Behar et al., 2012.     |
|           |    | JQ703297 | NA        | Behar et al., 2012.     |
|           |    | KR858869 | Scottish  | Family Tree DNA         |
|           |    | GQ160809 | Scottish  | Family Tree DNA         |
|           |    | JQ705479 | UK        | Behar et al., 2012.     |
| U5a1a1d1  | 13 | KF161882 | Danish    | Li et al., 2014.        |
|           |    | JX154024 | Danish    | Raule et al., 2014.     |
|           |    | KF162217 | Danish    | Li et al., 2014.        |
|           |    | KF161993 | Danish    | Li et al., 2014.        |
|           |    | MC2205   | English   | mtDNA Community         |
|           |    | JQ701866 | Irish     | Behar et al., 2012.     |
|           |    | JQ702809 | NA        | Behar et al., 2012.     |
|           |    | JQ701903 | NA        | Behar et al., 2012.     |
|           |    | KC257387 | NA        | Sequeira et al., 2015.  |
|           |    | JQ704695 | NA        | Behar et al., 2012.     |
|           |    | MC2989   | Swedish   | mtDNA Community         |
|           |    | MC3322   | USA       | mtDNA Community         |
|           |    | JQ705318 | Welsh     | Behar et al., 2012.     |
| U5a1a1e   | 4  | JQ705621 | NA        | Behar et al., 2012.     |

|         |   |          |           |                             |
|---------|---|----------|-----------|-----------------------------|
| U5a1a1g | 5 | MC2510   | NA        | mtDNA Community             |
|         |   | JQ704796 | NA        | Behar et al., 2012.         |
|         |   | MC844    | USA       | mtDNA Community             |
|         |   | KP128017 | English   | Family Tree DNA             |
|         |   | KT779182 | Lebanese  | Matisoo-Smith et al., 2016. |
| U5a1a1i | 2 | KT779180 | Lebanese  | Matisoo-Smith et al., 2016. |
|         |   | JQ705243 | NA        | Behar et al., 2012.         |
|         |   | MC1472   | Norwegian | mtDNA Community             |
|         |   | JQ582984 | English   | Family Tree DNA             |
|         |   | JX153282 | Italian   | Raule et al., 2014.         |
| U5a1a1j | 2 | 127_Sb   | Serbian   | this study                  |
|         |   | X93334   | Swedish   | Arnason et al., 1996.       |
| U5a1a1k | 2 | JQ701913 | English   | Behar et al., 2012.         |
|         |   | MC3212   | USA       | mtDNA Community             |
| U5a1a1l | 2 | KP735165 | Czech     | Family Tree DNA             |
|         |   | JQ703965 | NA        | Behar et al., 2012.         |
|         |   | JQ705065 | NA        | Behar et al., 2012.         |
| U5a1a1m | 3 | KC911503 | Qashqai   | Derenko et al., 2013.       |
|         |   | MC4018   | Slovak    | mtDNA Community             |
|         |   | DQ785296 | NA        | Family Tree DNA             |
| U5a1a1n | 2 | JQ702078 | NA        | Behar et al., 2012.         |
|         |   | JQ704823 | English   | Behar et al., 2012.         |
| U5a1a1o | 2 | KC911582 | Khalaj    | Derenko et al., 2013.       |
|         |   | JQ702730 | NA        | Behar et al., 2012.         |
| U5a1a1p | 2 | KM101910 | USA       | Just et al., 2015.          |

|          |    |          |                                |                          |         |
|----------|----|----------|--------------------------------|--------------------------|---------|
| U5a1a2a  | 29 | HQ588904 | Armenian                       | Family Tree DNA          |         |
|          |    | GU296557 | Buryat                         | Malyarchuk et al., 2010. |         |
|          |    | JQ705855 | German                         | Behar et al., 2012.      |         |
|          |    | MC569    | German                         | mtDNA Community          |         |
|          |    | BZH12    | Benzingerode-Heimburg, Germany | Haak et al., 2015.       | ancient |
|          |    | HM852836 | Iranian                        | Schonberg et al., 2011.  |         |
|          |    | JQ702806 | NA                             | Behar et al., 2012.      |         |
|          |    | JQ703717 | NA                             | Behar et al., 2012.      |         |
|          |    | GU296620 | Russian                        | Malyarchuk et al., 2010. |         |
|          |    | GU296623 | Russian                        | Malyarchuk et al., 2010. |         |
|          |    | KF451396 | Russian                        | Lippold et al., 2014.    |         |
|          |    | GU123037 | Russian                        | Malyarchuk et al., 2010. |         |
|          |    | KJ446097 | Russian                        | Zheng et al., 2014.      |         |
|          |    | 62_Sb    | Serbian                        | this study               |         |
|          |    | JQ702871 | Turkish                        | Behar et al., 2012.      |         |
| U5a1a2a1 | 10 | JX153678 | Danish                         | Raule et al., 2014.      |         |
|          |    | KC175644 | English                        | Family Tree DNA          |         |
|          |    | KC862290 | English                        | Family Tree DNA          |         |
|          |    | JQ705849 | NA                             | Behar et al., 2012.      |         |
|          |    | JQ702568 | NA                             | Behar et al., 2012.      |         |
|          |    | JQ703926 | Polish                         | Behar et al., 2012.      |         |
|          |    | KC602499 | Swedish                        | Family Tree DNA          |         |
|          |    | MC1657   | Swedish                        | mtDNA Community          |         |
|          |    | KR349268 | USA                            | Family Tree DNA          |         |
|          |    | MC1007   | USA                            | mtDNA Community          |         |
| U5a1a2a2 | 4  | KF161215 | Danish                         | Li et al., 2014.         |         |
|          |    | KF161506 | Danish                         | Li et al., 2014.         |         |
|          |    | KF161948 | Danish                         | Li et al., 2014.         |         |
|          |    | JQ704990 | NA                             | Behar et al., 2012.      |         |

U5a2b

80

|          |           |                             |
|----------|-----------|-----------------------------|
| KU727896 | Bulgarian | Family Tree DNA             |
| GU296559 | Buryat    | Malyarchuk et al., 2010.    |
| KJ856766 | Buryat    | Derenko et al., 2014.       |
| KJ856782 | Buryat    | Derenko et al., 2014.       |
| KF161858 | Danish    | Li et al., 2014.            |
| KF161711 | Danish    | Li et al., 2014.            |
| GU296577 | Hamnigan  | Malyarchuk et al., 2010.    |
| KT779196 | Lebanese  | Matisoo-Smith et al., 2016. |
| MC173    | NA        | mtDNA Community             |
| KM047194 | Polish    | Skonieczna et al., 2015.    |
| FJ460552 | Tunisian  | Costa et al., 2009.         |
| GU371930 | Ukrainian | Family Tree DNA             |

U5a2b1

40

|          |            |                          |
|----------|------------|--------------------------|
| GU296653 | Belarusian | Malyarchuk et al., 2010. |
| KF162973 | Danish     | Li et al., 2014.         |
| MC4879   | NA         | mtDNA Community          |
| GU296549 | Polish     | Malyarchuk et al., 2010. |
| GU296624 | Russian    | Malyarchuk et al., 2010. |
| GU296632 | Russian    | Malyarchuk et al., 2010. |
| GU296618 | Russian    | Malyarchuk et al., 2010. |
| GU296593 | Russian    | Malyarchuk et al., 2010. |

U5a2b1a

11

|          |            |                          |
|----------|------------|--------------------------|
| GU296651 | Belarusian | Malyarchuk et al., 2010. |
| KF161578 | Danish     | Li et al., 2014.         |
| JX153861 | Danish     | Raule et al., 2014.      |
| JX153363 | Danish     | Raule et al., 2014.      |
| KP266547 | Irish      | Family Tree DNA          |
| MC2704   | Irish      | mtDNA Community          |
| KP877127 | Italian    | Barcaccia et al., 2015.  |
| MC2154   | NA         | mtDNA Community          |
| JQ705696 | Polish     | Behar et al., 2012.      |
| GU296633 | Russian    | Malyarchuk et al., 2010. |

|        |          |   |          |            |                             |
|--------|----------|---|----------|------------|-----------------------------|
| U5a2b  | U5a2b1b  | 4 | JQ655176 | Sicilian   | Family Tree DNA             |
|        |          |   | GU296560 | Czech      | Malyarchuk et al., 2010.    |
|        |          |   | JQ704044 | German     | Behar et al., 2012.         |
|        |          |   | GU296607 | Russian    | Malyarchuk et al., 2010.    |
|        |          |   | MC1245   | Swiss      | mtDNA Community             |
|        | U5a2b1c  | 4 | KP726908 | Czech      | Family Tree DNA             |
|        |          |   | GU296600 | Russian    | Malyarchuk et al., 2010.    |
|        |          |   | GU296629 | Russian    | Malyarchuk et al., 2010.    |
|        |          |   | KM101983 | USA        | Just et al., 2015.          |
|        |          |   |          |            |                             |
|        | U5a2b1d  | 3 | GU296656 | Belarusian | Malyarchuk et al., 2010.    |
|        |          |   | EST44    | Estonian   | Stoljarova et al., 2016.    |
|        |          |   | JQ703087 | Greek      | Behar et al., 2012.         |
|        | U5a2b1e  | 3 |          |            |                             |
|        |          |   | GU296622 | Russian    | Malyarchuk et al., 2010.    |
| U5a2b2 | U5a2b1e1 | 2 | 146_Sb   | Serbian    | this study                  |
|        |          |   | 22_Sb    | Serbian    | this study                  |
|        |          |   |          |            |                             |
|        | U5a2b1f  | 3 | KF161453 | Danish     | Li et al., 2014.            |
|        |          |   | EST46    | Estonian   | Stoljarova et al., 2016.    |
|        |          |   | EF660930 | Italian    | Gasparre et al., 2007.      |
|        | U5a2b1g  | 2 | GU296578 | Belarusian | Malyarchuk et al., 2010.    |
|        |          |   | KF162779 | Danish     | Li et al., 2014.            |
|        | U5a2b1h  | 2 | JQ702746 | German     | Behar et al., 2012.         |
|        |          |   | KT900258 | Portuguese | Family Tree DNA             |
|        | U5a2b2   | 6 | KP189245 | Austrian   | Family Tree DNA             |
|        |          |   | KC246057 | Italian    | Family Tree DNA             |
|        |          |   | NA20765  | Tuscan     | Gomez-Carbala et al., 2015. |

|        |          |   |          |                       |                             |         |
|--------|----------|---|----------|-----------------------|-----------------------------|---------|
| U5a2b3 | U5a2b2a  | 3 | JQ702184 | NA                    | Behar et al., 2012.         | ancient |
|        | U5a2b2a1 | 2 | GU296587 | Polish                | Malyarchuk et al., 2010.    |         |
|        |          |   | GU296646 | Slovak                | Malyarchuk et al., 2010.    |         |
|        | U5a2b3a  | 6 | KC661077 | NA                    | Family Tree DNA             |         |
|        |          |   | KF161415 | Danish                | Li et al., 2014.            |         |
|        |          |   | KF161321 | Danish                | Li et al., 2014.            |         |
|        |          |   | JX153580 | Finnish               | Raule et al., 2014.         |         |
|        |          |   | JQ702847 | NA                    | Behar et al., 2012.         |         |
|        | U5a2b3a1 | 2 | JN899603 | English               | Family Tree DNA             |         |
|        |          |   | JQ702230 | Italian               | Behar et al., 2012.         |         |
| U5a2b4 | U5a2b4a  | 4 | KF162213 | Danish                | Li et al., 2014.            |         |
|        |          |   | BENZ14   | Benzingerode, Germany | Haak et al., 2015.          |         |
|        |          |   | JQ702320 | NA                    | Behar et al., 2012.         |         |
|        |          |   | MC1480   | USA                   | mtDNA Community             |         |
|        |          |   | JX153863 | Danish                | Raule et al., 2014.         |         |
|        |          |   | MC3216   | NA                    | mtDNA Community             |         |
| U5a2b5 | U5a2b5   | 3 | JQ704895 | NA                    | Behar et al., 2012.         |         |
|        |          |   | KC146708 | NA                    | Family Tree DNA             |         |
|        |          |   | EU597544 | Italian               | Hartmann et al., 2009.      |         |
|        |          |   | KJ446096 | Italian               | Zheng et al., 2014.         |         |
| U5a2b6 | U5a2b6   | 2 | NA20760  | Tuscan                | Gomez-Carbala et al., 2015. |         |
|        |          |   | JQ702392 | NA                    | Behar et al., 2012.         |         |
|        |          |   | 123_Sb   | Serbian               | this study                  |         |

|        |        |    |          |                          |                             |         |
|--------|--------|----|----------|--------------------------|-----------------------------|---------|
| U5b1a  | U5a2b7 | 2  | JQ703987 | NA                       | Behar et al., 2012.         |         |
|        |        |    | JQ702917 | NA                       | Behar et al., 2012.         |         |
|        |        | 9  | JN544933 | English                  | Family Tree DNA             |         |
|        |        |    | FJ194437 | French                   | Family Tree DNA             |         |
|        |        |    | KU534977 | Berry-Au-Bac,<br>France  | Posth et al., 2016.         | ancient |
|        |        |    | KC521455 | Loschbour,<br>Luxembourg | Fu et al., 2013.            | ancient |
|        |        |    | JQ704875 | NA                       | Behar et al., 2012.         |         |
|        | U5b1a1 | 4  | JQ703849 | Polish                   | Behar et al., 2012.         |         |
|        |        |    | GU296590 | Russian                  | Malyarchuk et al., 2010.    |         |
|        |        |    | 96_Sb    | Serbian                  | this study                  |         |
| U5b1e  | U5b1e  | 49 | 135_Sb   | Serbian                  | this study                  |         |
|        |        |    | GU296582 | Belarusian               | Malyarchuk et al., 2010.    |         |
|        |        |    | KJ446109 | French                   | Zheng et al., 2014.         |         |
|        |        |    | KU534978 | Ranchot, France          | Posth et al., 2016.         | ancient |
|        |        |    | HQ675040 | NA                       | Seoane et al., 2011.        |         |
|        |        |    | 7_Sb     | Serbian                  | this study                  |         |
|        |        |    | NA20540  | Tuscan                   | Gomez-Carbala et al., 2015. |         |
|        | U5b1e  | 38 | KT372902 | English                  | Family Tree DNA             |         |
|        |        |    | Z087     | Spanish                  | Ramos et al., 2013.         |         |
|        |        |    | JX677560 | USA                      | Family Tree DNA             |         |
| U5b1e1 |        | 35 | JX153868 | Danish                   | Raule et al., 2014.         |         |
|        |        |    | KF161292 | Danish                   | Li et al., 2014.            |         |
|        |        |    | EST97    | Estonian                 | Stoljarova et al., 2016.    |         |
|        |        |    | JX153815 | Finnish                  | Raule et al., 2014.         |         |
|        |        |    | JX152975 | Finnish                  | Raule et al., 2014.         |         |
|        |        |    | JX153824 | Finnish                  | Raule et al., 2014.         |         |
|        |        |    | JX153826 | Finnish                  | Raule et al., 2014.         |         |

|         |   |          |               |                          |
|---------|---|----------|---------------|--------------------------|
| U5b1e1a | 6 | JQ704302 | German        | Behar et al., 2012.      |
|         |   | MC845    | German        | mtDNA Community          |
|         |   | MC1456   | Latvian       | mtDNA Community          |
|         |   | KC257380 | NA            | Sequeira et al., 2015.   |
|         |   | JQ705267 | NA            | Behar et al., 2012.      |
|         |   | JQ705608 | NA            | Behar et al., 2012.      |
|         |   | MC1481   | NA            | mtDNA Community          |
|         |   | JQ705742 | NA            | Behar et al., 2012.      |
|         |   | MC1479   | NA            | mtDNA Community          |
|         |   | KJ446113 | Palestinian   | Zheng et al., 2014.      |
|         |   | KF451218 | Palestinian   | Lippold et al., 2014.    |
|         |   | KF451217 | Palestinian   | Lippold et al., 2014.    |
|         |   | KJ446114 | Palestinian   | Zheng et al., 2014.      |
|         |   | FJ493517 | Russian       | Sukernik et al., 2012.   |
|         |   | GU122991 | Russian       | Malyarchuk et al., 2010. |
|         |   | GU296630 | Russian       | Malyarchuk et al., 2010. |
|         |   | GU296647 | Slovak        | Malyarchuk et al., 2010. |
|         |   | GU296645 | Slovak        | Malyarchuk et al., 2010. |
|         |   | GU296639 | Slovak        | Malyarchuk et al., 2010. |
|         |   | JQ705405 | UK            | Behar et al., 2012.      |
|         |   | GU295665 | USA           | Family Tree DNA          |
|         |   | MC1765   | USA           | mtDNA Community          |
| U5b1h   | 3 | FJ499497 | Crimean Tatar | Family Tree DNA          |
|         |   | GU296571 | Czech         | Malyarchuk et al., 2010. |
|         |   | GU296585 | Polish        | Malyarchuk et al., 2010. |
|         |   | GU296631 | Russian       | Malyarchuk et al., 2010. |
|         |   | MC1799   | Ukrainian     | mtDNA Community          |
|         |   | MC1606   | Ukrainian     | mtDNA Community          |
|         |   | JQ705183 | NA            | Behar et al., 2012.      |
|         |   | JQ703755 | NA            | Behar et al., 2012.      |
|         |   | JQ704053 | NA            | Behar et al., 2012.      |



|       |         |    |          |           |                        |
|-------|---------|----|----------|-----------|------------------------|
| U5b1j |         | 2  | KT956911 | French    | Family Tree DNA        |
|       |         |    | KM101862 | USA       | Just et al., 2015.     |
| U5b3  |         | 80 | GQ129146 | Croatian  | Pala et al., 2009.     |
|       |         |    | GQ129144 | French    | Pala et al., 2009.     |
|       |         |    | GQ129148 | Italian   | Pala et al., 2009.     |
|       |         |    | GQ129147 | Spanish   | Pala et al., 2009.     |
| U5b3a |         | 29 |          |           |                        |
|       | U5b3a1  | 21 |          |           |                        |
|       |         | 19 |          |           |                        |
|       |         |    | AF346988 | Italian   | Ingman et al., 2000.   |
|       |         |    | GQ129151 | Sardinian | Pala et al., 2009.     |
|       |         |    | GQ129150 | Sardinian | Pala et al., 2009.     |
|       |         |    | KJ446118 | Sardinian | Zheng et al., 2014.    |
|       |         |    | DQ523664 | Sardinian | Fraumene et al., 2006. |
|       |         |    | DQ523658 | Sardinian | Fraumene et al., 2006. |
|       |         |    | DQ523655 | Sardinian | Fraumene et al., 2006. |
|       |         |    | DQ523624 | Sardinian | Fraumene et al., 2006. |
|       |         |    | DQ523628 | Sardinian | Fraumene et al., 2006. |
|       |         |    | GQ129153 | Sardinian | Pala et al., 2009.     |
|       |         |    | GQ129152 | Sardinian | Pala et al., 2009.     |
|       |         |    | GQ129155 | Sardinian | Pala et al., 2009.     |
|       |         |    | GQ129154 | Sardinian | Pala et al., 2009.     |
|       |         |    | EU597508 | Sardinian | Hartmann et al., 2009. |
|       |         |    | KF451190 | Sardinian | Lippold et al., 2014.  |
|       |         |    | DQ523669 | Sardinian | Fraumene et al., 2006. |
|       |         |    | DQ523644 | Sardinian | Fraumene et al., 2006. |
|       |         |    | GQ129156 | Sardinian | Pala et al., 2009.     |
|       |         |    | KJ446117 | Sardinian | Zheng et al., 2014.    |
|       |         |    | GQ129149 | Sardinian | Pala et al., 2009.     |
|       |         | 2  |          |           |                        |
|       |         |    | GQ129157 | French    | Pala et al., 2009.     |
|       |         |    | GQ129158 | USA       | Pala et al., 2009.     |
|       | U5b3a1b |    |          |           |                        |

|        |    |          |           |                          |
|--------|----|----------|-----------|--------------------------|
| U5b3a2 | 8  | JQ702792 | English   | Behar et al., 2012.      |
|        |    | EU926618 | English   | Family Tree DNA          |
|        |    | EST112   | Estonian  | Stoljarova et al., 2016. |
|        |    | GQ129164 | Estonian  | Pala et al., 2009.       |
|        |    | GQ129161 | Italian   | Pala et al., 2009.       |
|        |    | GQ129162 | Italian   | Pala et al., 2009.       |
|        |    | GQ129163 | USA       | Pala et al., 2009.       |
|        |    | KM101745 | USA       | Just et al., 2015.       |
| U5b3b  | 12 | GQ129168 | Italian   | Pala et al., 2009.       |
|        |    | JQ704971 | Scottish  | Behar et al., 2012.      |
| U5b3b1 | 6  | GQ129167 | Czech     | Pala et al., 2009.       |
|        |    | GQ129165 | Greek     | Pala et al., 2009.       |
|        |    | KT445932 | Irish     | Family Tree DNA          |
|        |    | JQ702146 | NA        | Behar et al., 2012.      |
|        |    | GQ129166 | Spanish   | Pala et al., 2009.       |
|        |    | MC1675   | USA       | mtDNA Community          |
| U5b3b2 | 4  | JX153697 | Danish    | Raule et al., 2014.      |
|        |    | GQ129169 | German    | Pala et al., 2009.       |
|        |    | EU130681 | NA        | Family Tree DNA          |
|        |    | JQ703971 | NA        | Behar et al., 2012.      |
| U5b3c  | 3  | GQ129172 | Italian   | Pala et al., 2009.       |
|        |    | GQ129170 | Sardinian | Pala et al., 2009.       |
|        |    | GQ129171 | Spanish   | Pala et al., 2009.       |
| U5b3d  | 2  | GQ129174 | Iraqi     | Pala et al., 2009.       |
|        |    | GQ129173 | Spanish   | Pala et al., 2009.       |
| U5b3e  | 7  | GQ129178 | Bulgarian | Pala et al., 2009.       |
|        |    | JQ702295 | Czech     | Behar et al., 2012.      |

|       |   |          |            |                             |
|-------|---|----------|------------|-----------------------------|
| U5b3f | 5 | KF162843 | Danish     | Li et al., 2014.            |
|       |   | HQ658737 | Dutch      | Family Tree DNA             |
|       |   | GQ129176 | German     | Pala et al., 2009.          |
|       |   | GQ129177 | Polish     | Pala et al., 2009.          |
|       |   | GQ129175 | UK         | Pala et al., 2009.          |
|       |   | GQ129183 | Italian    | Pala et al., 2009.          |
|       |   | GQ129180 | Italian    | Pala et al., 2009.          |
|       |   | GQ129181 | Italian    | Pala et al., 2009.          |
|       |   | GQ129182 | Spanish    | Pala et al., 2009.          |
|       |   | GQ129179 | USA        | Pala et al., 2009.          |
| U5b3g | 5 | MC22     | Australian | mtDNA Community             |
|       |   | JQ689453 | Irish      | Family Tree DNA             |
|       |   | GQ129143 | Italian    | Pala et al., 2009.          |
|       |   | KM101984 | USA        | Just et al., 2015.          |
|       |   | MC1408   | USA        | mtDNA Community             |
| U5b3h | 6 | JX154014 | Danish     | Raule et al., 2014.         |
|       |   | KF161350 | Danish     | Li et al., 2014.            |
|       |   | JX153636 | Danish     | Raule et al., 2014.         |
|       |   | JX153407 | Danish     | Raule et al., 2014.         |
|       |   | JN315868 | German     | Family Tree DNA             |
|       |   | MC320y   | German     | mtDNA Community             |
| U5b3i | 2 | GU296563 | Czech      | Malyarchuk et al., 2010.    |
|       |   | JQ705968 | English    | Behar et al., 2012.         |
| U5b3j | 2 | GQ129145 | Bosnian    | Pala et al., 2009.          |
| U5b3k | 3 | 21_Sb    | Serbian    | this study                  |
|       |   | GQ129159 | Italian    | Pala et al., 2009.          |
|       |   | KT779174 | Lebanese   | Matisoo-Smith et al., 2016. |
|       |   | GQ129160 | Moroccan   | Pala et al., 2009.          |

U7b

36

|          |           |                           |
|----------|-----------|---------------------------|
| KF161502 | Danish    | Li et al., 2014.          |
| JX152844 | Danish    | Raule et al., 2014.       |
| KT359595 | German    | Family Tree DNA           |
| MC787    | German    | mtDNA Community           |
| GU213255 | Indian    | Palanichamy et al., 2015. |
| GU213256 | Indian    | Palanichamy et al., 2015. |
| GU213247 | Indian    | Palanichamy et al., 2015. |
| KR139750 | Italian   | Family Tree DNA           |
| JQ705198 | NA        | Behar et al., 2012.       |
| AY882391 | Pakistani | Achilli et al., 2005.     |
| KC911278 | Persian   | Derenko et al., 2013.     |
| GU213236 | Russian   | Palanichamy et al., 2015. |
| 109_Sb   | Serbian   | this study                |
| GU213241 | Slovak    | Palanichamy et al., 2015. |
| AF382011 | Spanish   | Maca-Meyer et al., 2001.  |
| MC2242   | USA       | mtDNA Community           |

U7b1

9

|          |         |                          |
|----------|---------|--------------------------|
| EU445686 | Italian | Brisigheli et al., 2009. |
| EU445683 | Italian | Brisigheli et al., 2009. |
| EU445687 | Italian | Brisigheli et al., 2009. |
| EU445690 | Italian | Brisigheli et al., 2009. |
| EU445691 | Italian | Brisigheli et al., 2009. |
| EU445689 | Italian | Brisigheli et al., 2009. |
| EU445684 | Italian | Brisigheli et al., 2009. |
| EU445688 | Italian | Brisigheli et al., 2009. |
| EU445685 | Italian | Brisigheli et al., 2009. |

U7b2

7

|          |         |                           |
|----------|---------|---------------------------|
| JX153191 | Finnish | Raule et al., 2014.       |
| GQ176284 | Finnish | Family Tree DNA           |
| JX153172 | Finnish | Raule et al., 2014.       |
| KC763409 | Finnish | Soini et al., 2013.       |
| GU213258 | Indian  | Palanichamy et al., 2015. |
| MC3583   | NA      | mtDNA Community           |

|      |          |   |          |         |                           |
|------|----------|---|----------|---------|---------------------------|
| U7b3 |          | 2 | JQ704100 | NA      | Behar et al., 2012.       |
|      |          |   | KF161517 | Danish  | Li et al., 2014.          |
|      |          |   | KF162984 | Danish  | Li et al., 2014.          |
| U7b4 |          | 2 | GU213253 | Indian  | Palanichamy et al., 2015. |
|      |          |   | GU213244 | Indian  | Palanichamy et al., 2015. |
|      |          |   |          |         |                           |
|      | U8a1a1a  | 8 |          |         |                           |
|      | U8a1a1a1 | 2 | HM765458 | NA      | Zaragoza 2010.            |
|      |          |   | JQ705281 | Swiss   | Behar et al., 2012.       |
|      |          |   |          |         |                           |
|      | U8a1a1a2 | 2 | KJ856801 | Czech   | Derenko et al., 2014.     |
|      |          |   | 172_Sb   | Serbian | this study                |
|      |          |   |          |         |                           |
|      | U8a1a1a3 | 4 | DQ200803 | Basque  | Gonzalez 2006.            |
|      |          |   | GU299344 | English | Family Tree DNA           |
|      |          |   | JQ704011 | NA      | Behar et al., 2012.       |
|      |          |   | JQ705819 | Swedish | Behar et al., 2012.       |
|      |          |   |          |         |                           |

NA - not available; N- Number of sequences

## References:

1. Achilli A, Rengo C, Battaglia V, Pala M, Olivieri A, Fornarino S, Magri C, Scozzari R, Babudri N, Santachiara-Benerecetti AS et al. 2005. Saami and Berbers - An unexpected mitochondrial DNA link. *Am J Hum Genet* 76(5):883-886.
2. Allentoft ME, Sikora M, Sjogren KG, Rasmussen S, Rasmussen M, Stenderup J, Damgaard PB, Schroeder H, Ahlstrom T, Vinner L et al. 2015. Population genomics of Bronze Age Eurasia. *Nature* 522(7555):167.
3. Ancora M, Orsini M, Colosimo A, Marcacci M, Russo V, De Santo M, D'Aurora M, Stuppia L, Barboni B, Camma C et al. 2016. Complete sequence of human mitochondrial DNA obtained by combining multiple displacement amplification and next-generation sequencing on a single oocyte. *Mitochondrial DNA A DNA MappSeq Anal* 24:1-2.
4. Arnason U, Xu XF, Gullberg A. 1996. Comparison between the complete mitochondrial DNA sequences of Homo and the common chimpanzee based on nonchimeric sequences. *J Mol Evol* 42(2):145-152.
5. Barcaccia G, Galla G, Achilli A, Olivieri A, Torroni A. 2015. Uncovering the sources of DNA found on the Turin Shroud. *Sci Rep* 5(5):14484.
6. Behar DM, Metspalu E, Kivisild T, Achilli A, Hadid Y, Tzur S, Pereira L, Amorim A, Quintana-Murci L, Majamaa K et al. 2006. The matrilineal ancestry of Ashkenazi Jewry: portrait of a recent founder event. *Am J Hum Genet* 78(3):487-497.

7. Behar DM, van Oven M, Rosset S, Metspalu M, Loogvali EL, Silva NM, Kivisild T, Torroni A, Villems R. 2012. A "Copernican" Reassessment of the Human Mitochondrial DNA Tree from Its Root. *Am J Hum Genet* 90(5):936-936.
8. Brisighelli F, Capelli C, Alvarez-Iglesias V, Onofri V, Paoli G, Tofanelli S, Carracedo A, Pascali VL, Salas A. 2009. The Etruscan timeline: a recent Anatolian connection. *Eur J Hum Genet* 17(5):693-696.
9. Coble MD, Just RS, O'Callaghan JE, Letmanyi IH, Peterson CT, Irwin JA, Parsons TJ. 2004. Single nucleotide polymorphisms over the entire mtDNA genome that increase the power of forensic testing in Caucasians. *Int J Legal Med* 118(3):137-146.
10. Coia V, Cipollini G, Anagnostou P, Maixner F, Battaglia C, Brisighelli F, Gomez-Carballa A, Destro Biso G, Salas A, Zink A. 2016. Whole mitochondrial DNA sequencing in Alpine populations and the genetic history of the Neolithic Tyrolean Iceman. *Sci Rep* 6:18932.
11. Costa MD, Cherni L, Fernandes V, Freitas F, el Gaaied ABA, Pereira L. 2009. Data from complete mtDNA sequencing of Tunisian centenarians: Testing haplogroup association and the "golden mean" to longevity. *Mech Ageing Dev* 130(4):222-226.
12. Costa MD, Pereira JB, Pala M, Fernandes V, Olivieri A, Achilli A, Perego UA, Rychkov S, Naumova O, Hatina J et al. 2013. A substantial prehistoric European ancestry amongst Ashkenazi maternal lineages. *Nat Commun* 4:2543.
13. Davidovic S, Malyarchuk B, Aleksic JM, Derenko M, Topalovic V, Litvinov A, Stevanovic M, Kovacevic-Grujicic N. 2015. Mitochondrial DNA Perspective of Serbian Genetic Diversity. *Am J Phys Anthropol* 156(3):449-465.
14. Derenko M, Malyarchuk B, Bahmanimehr A, Denisova G, Perkova M, Farjadian S, Yepiskoposyan L. 2013. Complete mitochondrial DNA diversity in Iranians. *Plos ONE* 8(11):e80673.
15. Derenko M, Malyarchuk B, Denisova G, Perkova M, Litvinov A, Grzybowski T, Dambueva I, Skonieczna K, Rogalla U, Tsybovsky I et al. 2014. Western Eurasian ancestry in modern Siberians based on mitogenomic data. *BMC Evol Biol* 14:217.
16. Duggan AT, Whitten M, Wiebe V, Crawford M, Butthof A, Spitsyn V, Makarov S, Novgorodov I, Osakovsky V, Pakendorf B. 2013. Investigating the prehistory of Tungusic peoples of Siberia and the Amur-Ussuri region with complete mtDNA genome sequences and Y-chromosomal markers. *Plos ONE* 8(12):e83570.
17. Family Tree DNA - Genealogy by Genetics
18. Fraumene C, Belle EMS, Castri L, Sanna S, Mancosu G, Cosso M, Marras F, Barbujani G, Pirastu M, Angius A. 2006. High resolution analysis and phylogenetic network construction using complete mtDNA sequences in Sardinian genetic isolates. *Mol Biol Evol* 23(11):2101-2111.
19. Fu Q, Mittnik A, Johnson PL, Bos K, Lari M, Bollongino R, Sun C, Giemsch L, Schmitz R, Burger J et al. 2013. A revised timescale for human evolution based on ancient mitochondrial genomes. *Curr Biol* 23(7):553-559.
20. Fu QM, Rudan P, Paabo S, Krause J. 2012. Complete Mitochondrial Genomes Reveal Neolithic Expansion into Europe. *Plos ONE* 7(3): e32473.
21. Gasparre G, Porcelli AM, Bonora E, Pennisi LF, Toller M, Iommarini L, Ghelli A, Moretti M, Betts CM, Martinelli GN et al. 2007. Disruptive mitochondrial DNA mutations in complex I subunits are markers of oncocytic phenotype in thyroid tumors. *Proc Natl Acad Sci USA* 104(21):9001-9006.
22. Gomez-Carballa A, Pardo-Seco J, Amigo J, Martinon-Torres F, Salas A. 2015. Mitogenomes from The 1000 Genome Project reveal new Near Eastern features in present-day Tuscans. *Plos ONE* 10(3):e0119242.
23. Gomez-Duran A, Pacheu-Grau D, Lopez-Gallardo E, Diez-Sanchez C, Montoya J, Lopez-Perez MJ, Ruiz-Pesini E. 2010. Unmasking the causes of multifactorial disorders: OXPHOS differences between mitochondrial haplogroups. *Hum Mol Genet* 19(17):3343-3353.
24. Gonzalez AM, Garcia O, Larruga JM, Cabrera VM. 2006. The mitochondrial lineage U8a reveals a Paleolithic settlement in the Basque country. *BMC Genomics* 7:124.
25. Govindaraj P, Khan NA, Gopalakrishna P, Chandra RV, Vanniarajan A, Reddy AA, Singh S, Kumaresan R, Srinivas G, Singh L et al. 2011. Mitochondrial dysfunction and genetic heterogeneity in chronic periodontitis. *Mitochondrion* 11(3):504-512.

26. Guillet V, Chevrollier A, Cassereau J, Letournel F, Gueguen N, Richard L, Desquirit V, Verny C, Procaccio V, Amati-Bonneau P et al. 2010. Ethambutol-induced optic neuropathy linked to OPA1 mutation and mitochondrial toxicity. *Mitochondrion* 10(2):115-124.
27. Haak W, Lazaridis I, Patterson N, Rohland N, Mallick S, Llamas B, Brandt G, Nordenfelt S, Harney E, Stewardson K et al. 2015. Massive migration from the steppe was a source for Indo-European languages in Europe. *Nature* 522(7555):207.
28. Hartmann A, Thieme M, Nanduri LK, Stempf T, Moehle C, Kivisild T, Oefner PJ. 2009. Validation of Microarray-Based Resequencing of 93 Worldwide Mitochondrial Genomes. *Hum Mutat* 30(1):115-122.
29. Ingman M, Gyllensten U. 2007. Rate variation between mitochondrial domains and adaptive evolution in humans. *Hum Mol Genet* 16(19):2281-2287.
30. Ingman M, Kaessmann H, Paabo S, Gyllensten U. 2000. Mitochondrial genome variation and the origin of modern humans. *Nature* 408(6813):708-713.
31. Ji FY, Sharpley MS, Derbeneva O, Alves LS, Qian P, Wang YL, Chalkia D, Lvova M, Xu JC, Yao W et al. 2012. Mitochondrial DNA variant associated with Leber hereditary optic neuropathy and high-altitude Tibetans. *Proc Natl Acad Sci USA* 109(19):7391-7396.
32. Just RS, Scheible MK, Fast SA, Sturk-Andreaggi K, Rock AW, Bush JM, Higginbotham JL, Peck MA, Ring JD, Huber GE et al. 2015. Full mtGenome reference data: development and characterization of 588 forensic-quality haplotypes representing three U.S. populations. *Forensic Sci Int Genet* 14:141-155.
33. Khan N, Govindaraj P, Thangaraj K. 2012. NCBI GenBank.
34. Kloss-Brandstatter A, Schafer G, Erhart G, Huttenhofer A, Coassin S, Seifarth C, Summerer M, Bektic J, Klocker H, Kronenberg F. 2010. Somatic mutations throughout the entire mitochondrial genome are associated with elevated PSA levels in prostate cancer patients. *Am J Hum Genet* 87(6):802-812.
35. Kovacevic L, Tambets K, Ilumae AM, Kushniarevich A, Yunusbayev B, Solnik A, Bego T, Primorac D, Skaro V, Leskovac A et al. 2014. Standing at the Gateway to Europe - The Genetic Structure of Western Balkan Populations Based on Autosomal and Haploid Markers. *Plos ONE* 9(8):e105090.
36. Lang M, Vocke CD, Merino MJ, Schmidt LS, Linehan WM. 2015. Mitochondrial DNA mutations distinguish bilateral multifocal renal oncocytomas from familial Birt-Hogg-Dube tumors. *Mod Pathol* 28(11):1458-1469.
37. Li ST, Besenbacher S, Li YR, Kristiansen K, Grarup N, Albrechtsen A, Sparso T, Korneliussen T, Hansen T, Wang J et al. 2014. Variation and association to diabetes in 2000 full mtDNA sequences mined from an exome study in a Danish population. *Eur J Hum Genet* 22(8):1040-5.
38. Lippold S, Xu H, Ko A, Li M, Renaud G, Butthof A, Schroder R, Stoneking M. 2014. Human paternal and maternal demographic histories: insights from high-resolution Y chromosome and mtDNA sequences. *Investig Genet* 5:13.
39. Maasz A, Komlosi K, Hadzsiev K, Szabo Z, Willems PJ, Gerlinger I, Kosztolanyi G, Mehes K, Melegh B. 2008. Phenotypic variants of the deafness-associated mitochondrial DNA A7445G mutation. *Curr Med Chem* 15(13):1257-1262.
40. Maca-Meyer N, Gonzalez AM, Larruga JM, Flores C, Cabrera VM. 2001. Major genomic mitochondrial lineages delineate early human expansions. *Bmc Genet* 2:13.
41. Malyarchuk B, Derenko M, Denisova G, Kravtsova O. 2010a. Mitogenomic diversity in Tatars from the Volga-Ural region of Russia. *Mol Biol Evol* 27(10):2220-2226.
42. Malyarchuk B, Derenko M, Grzybowski T, Perkova M, Rogalla U, Vanecek T, Tsybovsky I. 2010b. The peopling of Europe from the mitochondrial haplogroup U5 perspective. *Plos ONE* 5(4):e10285.
43. Malyarchuk B, Grzybowski T, Derenko M, Perkova M, Vanecek T, Lazur J, Gomolcak P, Tsybovsky I. 2008. Mitochondrial DNA phylogeny in eastern and western Slavs. *Mol Biol Evol* 25(8):1651-1658.
44. Matisoo-Smith EA, Gosling AL, Boocock J, Kardailsky O, Kurumilian Y, Roudesli-Chebbi S, Badre L, Morel JP, Sebai LL, Zalloua PA. 2016. A European Mitochondrial Haplotype Identified in Ancient Phoenician Remains from Carthage, North Africa. *Plos ONE* 11(5):e0155046.
45. Moilanen JS, Finnila S, Majamaa K. 2003. Lineage-specific selection in human mtDNA: lack of polymorphisms in a segment of MTND5 gene in haplogroup J. *Mol Biol Evol* 20(12):2132-2142.

46. Montiel-Sosa F, Ruiz-Pesini E, Enriquez JA, Marcuello A, Diez-Sanchez C, Montoya J, Wallace DC, Lopez-Perez MJ. 2006. Differences of sperm motility in mitochondrial DNA haplogroup U sublineages. *Gene* 368:21-27.
47. mtDNA Community.
48. Pala M, Achilli A, Olivieri A, Kashani BH, Perego UA, Sanna D, Metspalu E, Tambets K, Tamm E, Accetturo M et al. 2009. Mitochondrial Haplogroup U5b3: A Distant Echo of the Epipaleolithic in Italy and the Legacy of the Early Sardinians. *Am J Hum Genet* 84(6):814-821.
49. Palanichamy MG, Mitra B, Zhang CL, Debnath M, Li GM, Wang HW, Agrawal S, Chaudhuri TK, Zhang YP. 2015. West Eurasian mtDNA lineages in India: an insight into the spread of the Dravidian language and the origins of the caste system. *Hum Genet* 134(6):637-647.
50. Palanichamy MG, Sun C, Agrawal S, Bandelt HJ, Kong QP, Khan F, Wang CY, Chaudhuri TK, Palla V, Zhang YP. 2004. Phylogeny of mitochondrial DNA macrohaplogroup N in India, based on complete sequencing: Implications for the peopling of South Asia. *Am J Hum Genet* 75(6):966-978.
51. Pello R, Martin MA, Carelli V, Nijtmans LG, Achilli A, Pala M, Torroni A, Gomez-Duran A, Ruiz-Pesini E, Martinuzzi A et al. 2008. Mitochondrial DNA background modulates the assembly kinetics of OXPHOS complexes in a cellular model of mitochondrial disease. *Hum Mol Genet* 17(24):4001-4011.
52. Pereira L, Goncalves J, Franco-Duarte R, Silva J, Rocha T, Arnold C, Richards M, Macaulay V. 2007. No evidence for an mtDNA role in sperm motility: Data from complete sequencing of asthenozoospermic males. *Mol Biol Evol* 24(3):868-874.
53. Perli E, Giordano C, Tuppen HAL, Montopoli M, Montanari A, Orlandi M, Pisano A, Catanzaro D, Caparrotta L, Musumeci B et al. 2012. Isoleucyl-tRNA synthetase levels modulate the penetrance of a homoplasmic m.4277T > C mitochondrial tRNA(Ile) mutation causing hypertrophic cardiomyopathy. *Hum Mol Genet* 21(1):85-100.
54. Pichler I, Fuchsberger C, Platzer C, Caliskan M, Marroni F, Pramstaller PP, Ober C. 2010. Drawing the history of the Hutterite population on a genetic landscape: inference from Y-chromosome and mtDNA genotypes. *Eur J Hum Genet* 18(4):463-470.
55. Posth C, Renaud G, Mittnik A, Drucker DG, Rougier H, Cupillard C, Valentin F, Thevenet C, Furtwangler A, Wissing C et al. 2016. Pleistocene Mitochondrial Genomes Suggest a Single Major Dispersal of Non-Africans and a Late Glacial Population Turnover in Europe. *Curr Biol* 26(6):827-833.
56. Ramos A, Santos C, Mateiu L, Gonzalez MD, Alvarez L, Azevedo L, Amorim A, Aluja MP. 2013. Frequency and Pattern of Heteroplasmy in the Complete Human Mitochondrial Genome. *Plos ONE* 8(10):e74636.
57. Raule N, Sevinci F, Li S, Barbieri A, Tallaro F, Lomartire L, Vianello D, Montesanto A, Moilanen JS, Bezrukov V et al. 2014. The co-occurrence of mtDNA mutations on different oxidative phosphorylation subunits, not detected by haplogroup analysis, affects human longevity and is population specific. *Aging Cell* 13(3):401-407.
58. Schonberg A, Theunert C, Li MK, Stoneking M, Nasidze I. 2011. High-throughput sequencing of complete human mtDNA genomes from the Caucasus and West Asia: high diversity and demographic inferences. *Eur J Hum Genet* 19(9):988-994.
59. Seoane M, Mosquera-Miguel A, Gonzalez T, Fraga M, Salas A, Costoya JA. 2011. The Mitochondrial Genome Is a "Genetic Sanctuary" during the Oncogenic Process. *Plos ONE* 6(8):e23327.
60. Sequeira A, Rollins B, Magnan C, van Oven M, Baldi P, Myers RM, Barchas JD, Schatzberg AF, Watson SJ, Akil H et al. 2015. Mitochondrial mutations in subjects with psychiatric disorders. *Plos ONE* 10(5):e0127280.
61. Shlush LI, Behar DM, Yudkovsky G, Templeton A, Hadid Y, Basis F, Hammer M, Itzkovitz S, Skorecki K. 2008. The Druze: a population genetic refugium of the Near East. *Plos ONE* 3(5):e2105.
62. Skonieczna K, Malyarchuk B, Jawien A, Marszalek A, Banaszkiewicz Z, Jarmocik P, Borcz M, Bala P, Grzybowski T. 2015. Heteroplasmic substitutions in the entire mitochondrial genomes of human colon cells detected by ultra-deep 454 sequencing. *Forensic Sci Int-Gen* 15:16-20.
63. Soini HK, Moilanen JS, Vilmi-Kerala T, Finnila S, Majamaa K. 2013. Mitochondrial DNA variant m.15218A > G in Finnish epilepsy patients who have maternal relatives with epilepsy, sensorineural hearing impairment or diabetes mellitus. *BMC Med Genet* 14:73.



64. Stoljarova M, King JL, Takahashi M, Aaspollu A, Budowle B. 2016. Whole mitochondrial genome genetic diversity in an Estonian population sample. *Int J Legal Med* 130(1):67-71.
65. Sukernik RI, Volodko NV, Mazunin IO, Eltsov NP, Dryomov SV, Starikovskaya EB. 2012. Mitochondrial genome diversity in the tubalar, even, and ulchi: Contribution to prehistory of native siberians and their affinities to native americans. *Am J Phys Anthropol* 148(1):123-138.
66. Volodko NV, Starikovskaya EB, Mazunin IO, Eltsov NP, Naidenko PV, Wallace DC, Sukernik RI. 2008. Mitochondrial genome diversity in arctic Siberians, with particular reference to the evolutionary history of Beringia and Pleistocenic peopling of the Americas. *Am J Hum Genet* 82(5):1084-1100.
67. Vyas DN, Kitchen A, Miro-Herrans AT, Pearson LN, Al-Meer A, Mulligan CJ. 2016. Bayesian analyses of Yemeni mitochondrial genomes suggest multiple migration events with Africa and Western Eurasia. *Am J Phys Anthropol* 159(3):382-393.
68. Zaragoza MV, Fass J, Diegoli M, Lin DW, Arbustini E. 2010. Mitochondrial DNA Variant Discovery and Evaluation in Human Cardiomyopathies through Next-Generation Sequencing. *Plos ONE* 5(8):e12295.
69. Zheng H, Qin Z, Jin L, Jin L. 2014. NCBI GenBank.
