# Supplementary material
Source: publisher figshare collection journal article supplement (https://tandf.figshare.com/articles/dataset/_/4738054)
Supplement: Supplementary file 5 [file 1]

**Table S2.** *De novo* and previously sequenced super-haplogroup U mitogenomes of our samples

|    | Population | Sample ID/Acc. No. | mtDNA haplogroup | Haplogroup assignment based on control region sequencing and coding region markers | Complete mitogenome sequencing |
|----|------------|--------------------|------------------|------------------------------------------------------------------------------------|--------------------------------|
| 1  | Serbian    | 4_Sb               | K1a4l            | Davidovic et al., 2015                                                             | this study                     |
| 2  | Serbian    | 5_Sb               | K1b1c            | Davidovic et al., 2015                                                             | this study                     |
| 3  | Serbian    | 7_Sb               | U5b1e'h          | Davidovic et al., 2015                                                             | this study                     |
| 4  | Serbian    | 10_Sb              | K1a4d            | Davidovic et al., 2015                                                             | this study                     |
| 5  | Serbian    | 11_Sb              | U4b              | Davidovic et al., 2015                                                             | this study                     |
| 6  | Serbian    | 21_Sb              | U5b3j            | Davidovic et al., 2015                                                             | this study                     |
| 7  | Serbian    | 22_Sb              | U5a2b1e1         | Davidovic et al., 2015                                                             | this study                     |
| 8  | Serbian    | 23_Sb              | K1b2a2           | Davidovic et al., 2015                                                             | this study                     |
| 9  | Serbian    | 39_Sb              | K1a13a1          | Davidovic et al., 2015                                                             | this study                     |
| 10 | Serbian    | 52_Sb              | U2e2a1d          | Davidovic et al., 2015                                                             | this study                     |
| 11 | Serbian    | 53_Sb              | U4c1b1           | Davidovic et al., 2015                                                             | this study                     |
| 12 | Serbian    | 57_Sb              | K1a4a1           | Davidovic et al., 2015                                                             | this study                     |
| 13 | Serbian    | 58_Sb              | U4d2b            | Davidovic et al., 2015                                                             | this study                     |
| 14 | Serbian    | 62_Sb              | U5a1a2a          | Davidovic et al., 2015                                                             | this study                     |
| 15 | Serbian    | 66_Sb              | U4c1b1           | Davidovic et al., 2015                                                             | this study                     |
| 16 | Serbian    | 68_Sb              | U4b1a1a1         | Davidovic et al., 2015                                                             | this study                     |
| 17 | Serbian    | 80_Sb              | K1a2             | Davidovic et al., 2015                                                             | this study                     |
| 18 | Serbian    | 84_Sb              | U4b1a1a          | Davidovic et al., 2015                                                             | this study                     |
| 19 | Serbian    | 89_Sb              | K1a30b           | Davidovic et al., 2015                                                             | this study                     |
| 20 | Serbian    | 93_Sb              | U1a1c2           | Davidovic et al., 2015                                                             | this study                     |
| 21 | Serbian    | 95_Sb              | U3a3             | Davidovic et al., 2015                                                             | this study                     |
| 22 | Serbian    | 96_Sb              | U5b1a1           | Davidovic et al., 2015                                                             | this study                     |
| 23 | Serbian    | 104_Sb             | U4b1a1a1a        | Davidovic et al., 2015                                                             | this study                     |
| 24 | Serbian    | 109_Sb             | U7b              | Davidovic et al., 2015                                                             | this study                     |
| 25 | Serbian    | 123_Sb             | U5a2b6           | Davidovic et al., 2015                                                             | this study                     |
| 26 | Serbian    | 127_Sb             | U5a1a1j          | Davidovic et al., 2015                                                             | this study                     |
| 27 | Serbian    | 134_Sb             | U4c1             | Davidovic et al., 2015                                                             | this study                     |
| 28 | Serbian    | 135_Sb             | U5b1a1           | Davidovic et al., 2015                                                             | this study                     |
| 29 | Serbian    | 138_Sb             | K1a4k            | Davidovic et al., 2015                                                             | this study                     |
| 30 | Serbian    | 144_Sb             | U3a1d            | Davidovic et al., 2015                                                             | this study                     |
| 31 | Serbian    | 145_Sb             | K1b1c            | Davidovic et al., 2015                                                             | this study                     |
| 32 | Serbian    | 146_Sb             | U5a2b1e1         | Davidovic et al., 2015                                                             | this study                     |
| 33 | Serbian    | 148_Sb             | K1b1c            | Davidovic et al., 2015                                                             | this study                     |
| 34 | Serbian    | 168_Sb             | U1a1c2           | this study                                                                         | this study                     |
| 35 | Serbian    | 170_Sb             | U2e1b1           | this study                                                                         | this study                     |
| 36 | Serbian    | 172_Sb             | U8a1a1a2         | this study                                                                         | this study                     |
| 37 | Serbian    | KM096779           | U4a2a            | Davidovic et al., 2015                                                             | Davidovic et al., 2015         |
| 38 | Serbian    | KM096774           | U4a2a1           | Davidovic et al., 2015                                                             | Davidovic et al., 2015         |
| 39 | Serbian    | KM096781           | U4a2c2           | Davidovic et al., 2015                                                             | Davidovic et al., 2015         |
| 40 | Serbian    | KM096773           | U4a2g1           | Davidovic et al., 2015                                                             | Davidovic et al., 2015         |
| 41 | Czech      | Cz_III10           | K1a4             | this study                                                                         | this study                     |
| 42 | Czech      | Cz_V471            | K1a4d            | this study                                                                         | this study                     |
| 43 | Polish     | K663               | K1b1c1           | this study                                                                         | this study                     |
| 44 | Polish     | P142               | K1b1c1           | this study                                                                         | this study                     |
| 45 | Russian    | NN_20              | K1a2             | this study                                                                         | this study                     |
| 46 | Slovak     | SI_218             | K1b1c1           | this study                                                                         | this study                     |
